# Supplementary material
Source: publisher figshare collection journal article supplement (https://gsajournals.figshare.com/ndownloader/files/24062282)
Supplement: Supplementary file 1 [file 24062282]

## Sheet: Supplementary Table S1
Supplementary Table S1: Interproscan and EffectorP 2.0 annotation of predicted proteins in the FO5176 genome
gene_id	chr	start	end	SignalP_EUK	Phobius_TM	Phobius_Secr	Phobius_EC	Phobius_CP	Number of transmembrane domains predicted (TMHMM)	EffectorP2.0_prediction	EffectorP2.0_prob	Protein_length	Percent_Cysteine	PFAM	InterProScan summary	GO terms	Pathway	CDD domains	ProSiteProfiles	SMART	SUPERFAMILY	TIGRFAM	Hamap
g1	1	2309	3520									403	3.47	MYND finger	Transcription factor DEAF-1, Zinc finger, MYND-type				Zinc finger, MYND-type				Transcription factor DEAF-1
g2	1	3820	8258									1440	1.18
g3	1	11763	12077									104	2.88		LysM domain			LysM domain
g4	1	13754	16799									558	3.94	Glycosyl hydrolases family 18, Chitin recognition protein	Glycoside hydrolase family 18, catalytic domain, Chitinase insertion domain superfamily, Endochitinase-like superfamily, Chitin-binding, type 1, Chitin-binding, type 1, conserved site, Glycoside hydrolase superfamily	GO:0005975|GO:0008061			Chitin-binding, type 1	Chitin-binding, type 1	Endochitinase-like superfamily, Glycoside hydrolase superfamily
g5	1	16890	17884									312	3.53
g6	1	19042	19588	1		1	1			Non-effector	0.704	161	4.97	CFEM domain	Extracellular membrane protein, CFEM domain					Extracellular membrane protein, CFEM domain
g7	1	24974	26034	1		1	1			Non-effector	0.967	320	2.19
g8	1	30535	31314	1		1	1			Non-effector	0.791	259	2.7
g9	1	34916	36506		12		6	7	12			488	1.43	Major Facilitator Superfamily	MFS transporter superfamily, Major facilitator superfamily domain, Major facilitator superfamily	GO:0022857|GO:0022857|GO:0055085			Major facilitator superfamily domain		MFS transporter superfamily
g10	1	36985	37914									309	0.32	SMP-30/Gluconolactonase/LRE-like region	SMP-30/Gluconolactonase/LRE-like region, Six-bladed beta-propeller, TolB-like
g11	1	49934	50485	1		1	1			Effector	0.69	160	3.75
g12	1	54641	58238		1		1	1				911	2.52	Fungal Zn(2)-Cys(6) binuclear cluster domain, Tannase and feruloyl esterase	Zn(2)-C6 fungal-type DNA-binding domain superfamily, Zn(2)-C6 fungal-type DNA-binding domain, Tannase/feruloyl esterase, Alpha/Beta hydrolase fold	GO:0000981|GO:0006355|GO:0008270|GO:0042025	MetaCyc: PWY-6784	Zn(2)-C6 fungal-type DNA-binding domain	Zn(2)-C6 fungal-type DNA-binding domain	Zn(2)-C6 fungal-type DNA-binding domain	Zn(2)-C6 fungal-type DNA-binding domain superfamily, Alpha/Beta hydrolase fold		Tannase/feruloyl esterase
g13	1	58911	59844		7		4	4	7			291	1.72	RTA1 like protein	RTA-like protein	GO:0016021							RTA-like protein
g14	1	60707	62583									319	1.25	Peptidase family M20/M25/M40	Peptidase M20, Bacterial exopeptidase dimerisation domain	GO:0016787					Bacterial exopeptidase dimerisation domain
g15	1	63388	66717									1109	1.17
g16	1	70115	71833	1		1	1		1			532	3.2	Tannase and feruloyl esterase	Tannase/feruloyl esterase, Alpha/Beta hydrolase fold		MetaCyc: PWY-6784				Alpha/Beta hydrolase fold		Tannase/feruloyl esterase
g17	1	73034	74367		7		4	4	7			358	1.96
g18	1	85861	87067									378	1.32	Metallo-beta-lactamase superfamily	Ribonuclease Z/Hydroxyacylglutathione hydrolase-like, Metallo-beta-lactamase					Metallo-beta-lactamase	Ribonuclease Z/Hydroxyacylglutathione hydrolase-like
g19	1	87570	91035		10		5	6	9			886	1.92	Major Facilitator Superfamily, Fungal specific transcription factor domain	Major facilitator superfamily domain, Transcription factor domain, fungi, Major facilitator superfamily, MFS transporter superfamily	GO:0022857|GO:0003677|GO:0005634|GO:0006351|GO:0008270|GO:0022857|GO:0055085			Major facilitator superfamily domain	Transcription factor domain, fungi	MFS transporter superfamily
g20	1	94105	96729									694	2.16	Homeobox KN domain	Homeobox KN domain, Homeobox domain, Homeobox-like domain superfamily	GO:0003677|GO:0006355|GO:0003677		Homeobox domain	Homeobox domain	Homeobox domain	Homeobox-like domain superfamily
g21	1	110185	114763		15		8	8	11			1232	1.3	ABC transporter transmembrane region, ABC transporter	P-loop containing nucleoside triphosphate hydrolase, ABC transporter type 1, transmembrane domain superfamily, ABC transporter type 1, transmembrane domain, ABC transporter, conserved site, AAA+ ATPase domain, ABC transporter-like	GO:0005524|GO:0016021|GO:0005524|GO:0016021|GO:0042626|GO:0055085|GO:0005524|GO:0016887			ABC transporter-like, ABC transporter type 1, transmembrane domain, ABC transporter-like, ABC transporter type 1, transmembrane domain	AAA+ ATPase domain, AAA+ ATPase domain	P-loop containing nucleoside triphosphate hydrolase, ABC transporter type 1, transmembrane domain superfamily, P-loop containing nucleoside triphosphate hydrolase, ABC transporter type 1, transmembrane domain superfamily
g22	1	115446	117224		11		6	6	12			521	1.15	Major Facilitator Superfamily	MFS transporter superfamily, Major facilitator superfamily, Major facilitator superfamily domain	GO:0022857|GO:0055085|GO:0022857			Major facilitator superfamily domain		MFS transporter superfamily
g23	1	118124	119473									449	3.56
g24	1	119878	120519									213	0.94
g25	1	125123	126715	1		1	1			Effector	0.618	284	1.06	Bacterial tandem repeat domain 1, Bacterial tandem repeat domain 1, Bacterial tandem repeat domain 1, Bacterial tandem repeat domain 1
g26	1	126816	128088		7		4	4	7			362	1.1	Major Facilitator Superfamily	MFS transporter superfamily, Major facilitator superfamily domain, Major facilitator superfamily	GO:0022857|GO:0022857|GO:0055085			Major facilitator superfamily domain		MFS transporter superfamily
g27	1	130252	131391	1		1	1			Non-effector	0.589	364		Bacterial extracellular solute-binding protein
g28	1	132670	133757									292	1.37	Enoyl-(Acyl carrier protein) reductase	NAD(P)-binding domain superfamily, Short-chain dehydrogenase/reductase SDR						NAD(P)-binding domain superfamily
g29	1	134731	135683									297		Glycosyl hydrolase family 20, catalytic domain	Beta-hexosaminidase, Glycoside hydrolase family 20, catalytic domain, Glycoside hydrolase superfamily	GO:0004563|GO:0005975|GO:0004553|GO:0005975	KEGG: 00511+3.2.1.52|KEGG: 00513+3.2.1.52|KEGG: 00520+3.2.1.52|KEGG: 00531+3.2.1.52|KEGG: 00603+3.2.1.52|KEGG: 00604+3.2.1.52|MetaCyc: PWY-6902|MetaCyc: PWY-7822|MetaCyc: PWY-7883|Reactome: R-HSA-1660662|Reactome: R-HSA-2022857|Reactome: R-HSA-2024101|Reactome: R-HSA-2160916, KEGG: 00511+3.2.1.52|KEGG: 00513+3.2.1.52|KEGG: 00520+3.2.1.52|KEGG: 00531+3.2.1.52|KEGG: 00603+3.2.1.52|KEGG: 00604+3.2.1…				Glycoside hydrolase superfamily
g30	1	136357	137052									231	1.3	O-methyltransferase	Class I-like SAM-dependent O-methyltransferase, S-adenosyl-L-methionine-dependent methyltransferase	GO:0008171			Class I-like SAM-dependent O-methyltransferase		S-adenosyl-L-methionine-dependent methyltransferase
g31	1	138663	139451									262	2.29
g32	1	139673	140659									252	1.19	ThiJ/PfpI family-like	Class I glutamine amidotransferase-like, ThiJ/PfpI family-like						Class I glutamine amidotransferase-like
g33	1	141394	142890									498	0.6	Fungal specific transcription factor domain	Fungal transcription factor
g34	1	152404	155643									1079	1.67	CHAT domain	Tetratricopeptide-like helical domain superfamily, CHAT domain	GO:0005515
g35	1	157713	158814									297	1.01	NAD(P)H-binding	NAD(P)-binding domain, NAD(P)-binding domain superfamily						NAD(P)-binding domain superfamily
g36	1	163190	169092									1696	1.77	PIF1-like helicase, Helitron helicase-like domain at N-terminus	DNA helicase Pif1-like, Helitron helicase-like domain, P-loop containing nucleoside triphosphate hydrolase	GO:0000723|GO:0003678|GO:0006281					P-loop containing nucleoside triphosphate hydrolase, P-loop containing nucleoside triphosphate hydrolase
g37	1	169606	170790									394	0.76	Peptidase family S58	Peptidase S58, DmpA, ArgJ-like domain superfamily		KEGG: 00220+2.3.1.35+2.3.1.1|MetaCyc: PWY-5154				ArgJ-like domain superfamily		Peptidase S58, DmpA
g38	1	172067	173932		14		7	8	12			584	1.2	Major Facilitator Superfamily	Tetracycline resistance protein/drug resistance transporter, Major facilitator superfamily, MFS transporter superfamily, Major facilitator superfamily domain	GO:0022857|GO:0055085|GO:0022857			Major facilitator superfamily domain		MFS transporter superfamily		Tetracycline resistance protein/drug resistance transporter
g39	1	177945	179950		4		3	2	4			631	0.79
g40	1	180085	182825									847	2.83	Fungal specific transcription factor domain, Fungal Zn(2)-Cys(6) binuclear cluster domain	Zn(2)-C6 fungal-type DNA-binding domain, Zn(2)-C6 fungal-type DNA-binding domain superfamily, Transcription factor domain, fungi	GO:0000981|GO:0006355|GO:0008270|GO:0042025|GO:0003677|GO:0005634|GO:0006351|GO:0008270		Zn(2)-C6 fungal-type DNA-binding domain	Zn(2)-C6 fungal-type DNA-binding domain	Zn(2)-C6 fungal-type DNA-binding domain	Zn(2)-C6 fungal-type DNA-binding domain superfamily
g41	1	189132	189763									193	0.52	Isochorismatase family	Isochorismatase-like, Isochorismatase-like superfamily	GO:0003824					Isochorismatase-like superfamily
g42	1	189822	191603		2		2	1				544	0.92	Cytochrome P450	Cytochrome P450, conserved site, Cytochrome P450, E-class, group I, Cytochrome P450, Cytochrome P450 superfamily	GO:0016705|GO:0055114|GO:0005506|GO:0016705|GO:0020037|GO:0055114					Cytochrome P450 superfamily
g43	1	193169	194581									470	1.49	Phosphorylase superfamily	Nucleoside phosphorylase domain, Nucleoside phosphorylase superfamily	GO:0003824|GO:0009116					Nucleoside phosphorylase superfamily
g44	1	198476	200023									380	1.05	Methyltransferase domain	S-adenosyl-L-methionine-dependent methyltransferase						S-adenosyl-L-methionine-dependent methyltransferase
g45	1	201266	203513									663	0.9	Acetyl-coenzyme A synthetase N-terminus, AMP-binding enzyme, AMP-binding enzyme C-terminal domain	Acetyl-coenzyme A synthetase, N-terminal domain, Acetate-CoA ligase, AMP-dependent synthetase/ligase, AMP-binding enzyme, C-terminal domain, AMP-binding, conserved site, AMP-dependent synthetase-like superfamily	GO:0003987|GO:0016208|GO:0019427|GO:0003824	KEGG: 00010+6.2.1.1|KEGG: 00620+6.2.1.1|KEGG: 00630+6.2.1.1|KEGG: 00640+6.2.1.1|KEGG: 00680+6.2.1.1|KEGG: 00720+6.2.1.1|MetaCyc: PWY-5108|MetaCyc: PWY-5132|MetaCyc: PWY-5133|MetaCyc: PWY-6672|MetaCyc: PWY-7118|MetaCyc: PWY-7857, KEGG: 00010+6.2.1.1|KEGG: 00620+6.2.1.1|KEGG: 00630+6.2.1.1|KEGG: 00640+6.2.1.1|KEGG: 00680+6.2.1.1|KEGG: 00720+6.2.1.1|MetaCyc: PWY-5108|MetaCyc: PWY-5132|MetaCyc: PWY-5…					Acetate-CoA ligase
g46	1	203755	204907									345		alpha/beta hydrolase fold	Alpha/Beta hydrolase fold, Alpha/beta hydrolase fold-3	GO:0016787					Alpha/Beta hydrolase fold
g47	1	205355	208847									824	1.09	Fungal N-terminal domain of STAND proteins, Beta-lactamase	Beta-lactamase/transpeptidase-like, Fungal N-terminal domain of STAND protein, Beta-lactamase-related						Beta-lactamase/transpeptidase-like
g48	1	209356	209787									143	0.7	Endoribonuclease L-PSP	YjgF/YER057c/UK114 family, RutC-like superfamily		Reactome: R-HSA-8849175				RutC-like superfamily
g49	1	209961	210778									232	1.72	Bacterial transferase hexapeptide (six repeats), Maltose acetyltransferase	Hexapeptide repeat, Maltose/galactoside acetyltransferase, Trimeric LpxA-like superfamily	GO:0016407				Maltose/galactoside acetyltransferase	Trimeric LpxA-like superfamily
g50	1	211351	213282		12		6	7	11			535	2.43	Amino acid permease	Amino acid/polyamine transporter I, Amino acid permease, conserved site	GO:0016020|GO:0022857|GO:0055085|GO:0006865|GO:0016021|GO:0055085
g51	1	213932	215640									498	0.6	Flavin containing amine oxidoreductase	Amine oxidase, FAD/NAD(P)-binding domain superfamily, Flavin amine oxidase	GO:0016491|GO:0055114					FAD/NAD(P)-binding domain superfamily
g52	1	216206	217096									260	0.77	Enoyl-(Acyl carrier protein) reductase	Short-chain dehydrogenase/reductase, conserved site, Short-chain dehydrogenase/reductase SDR, NAD(P)-binding domain superfamily	GO:0016491					NAD(P)-binding domain superfamily
g53	1	217595	220153									547	2.01	Fungal specific transcription factor domain	Fungal transcription factor
g54	1	220619	221581									320	0.94	Amino-transferase class IV	Branched-chain-amino-acid aminotransferase-like, N-terminal, Aminotransferase class IV, Aminotransferase-like, PLP-dependent enzymes, Branched-chain-amino-acid aminotransferase-like, C-terminal	GO:0003824	Reactome: R-HSA-70895				Aminotransferase-like, PLP-dependent enzymes
g55	1	222393	223677			1	1		1			353	0.85	FAD dependent oxidoreductase	D-amino acid oxidase, conserved site, D-amino-acid oxidase, FAD dependent oxidoreductase	GO:0003884|GO:0055114|GO:0003884|GO:0046416|GO:0071949|GO:0016491|GO:0055114	Reactome: R-HSA-389661|Reactome: R-HSA-9033241						D-amino-acid oxidase
g56	1	223968	227633	1		1	1			Non-effector	0.99	1221	1.88
g57	1	232588	233557									285	1.75	Alanine racemase, N-terminal domain	PLP-binding barrel, Alanine racemase, N-terminal		KEGG: 00473+5.1.1.1|MetaCyc: PWY-7383|MetaCyc: PWY-8040|MetaCyc: PWY-8072				PLP-binding barrel
g58	1	234200	235899		11		6	6	12			505	3.76	Amino acid permease	Amino acid/polyamine transporter I	GO:0016020|GO:0022857|GO:0055085
g59	1	236445	238182									515	1.17	Glutamine synthetase, catalytic domain, Glutamine synthetase, catalytic domain	Glutamine synthetase, catalytic domain, Glutamine synthetase/guanido kinase, catalytic domain	GO:0004356|GO:0006807|GO:0003824	KEGG: 00220+6.3.1.2|KEGG: 00250+6.3.1.2|KEGG: 00630+6.3.1.2|KEGG: 00910+6.3.1.2|MetaCyc: PWY-381|MetaCyc: PWY-5675|MetaCyc: PWY-6549|MetaCyc: PWY-6963|MetaCyc: PWY-6964			Glutamine synthetase, catalytic domain	Glutamine synthetase/guanido kinase, catalytic domain
g60	1	239154	240717		1		1	1	1			465	1.29	Aldehyde dehydrogenase family	Aldehyde/histidinol dehydrogenase, Aldehyde dehydrogenase, glutamic acid active site, Aldehyde dehydrogenase domain, Aldehyde dehydrogenase, cysteine active site, Aldehyde dehydrogenase, N-terminal, Aldehyde dehydrogenase, C-terminal	GO:0016491|GO:0055114|GO:0016491|GO:0016620|GO:0055114					Aldehyde/histidinol dehydrogenase
g61	1	241335	242500									326	0.92	Enoyl-(Acyl carrier protein) reductase, short chain dehydrogenase	Short-chain dehydrogenase/reductase SDR, NAD(P)-binding domain superfamily						NAD(P)-binding domain superfamily
g62	1	242560	245618		6		4	3	4			663	2.26	Fungal specific transcription factor domain	MFS transporter superfamily, Fungal transcription factor						MFS transporter superfamily
g63	1	247652	248446									264	1.52	Acetyltransferase (GNAT) domain	GNAT domain, Acyl-CoA N-acyltransferase	GO:0008080			GNAT domain		Acyl-CoA N-acyltransferase
g64	1	250197	251056									263	1.14	Hemerythrin HHE cation binding domain	Haemerythrin-like		Reactome: R-HSA-390471|Reactome: R-HSA-8951664|Reactome: R-HSA-917937|Reactome: R-HSA-983168
g65	1	252751	253715	1	1	1	1	1	1			282	1.42
g66	1	254455	255350	1		1	1			Non-effector	0.991	263	2.66
g67	1	258707	260419		12		6	7	12			488	3.28	Major Facilitator Superfamily	MFS transporter superfamily, Major facilitator superfamily	GO:0022857|GO:0055085					MFS transporter superfamily
g68	1	260916	262074									348	2.59	Phosphoenolpyruvate phosphomutase	ICL/PEPM domain, Pyruvate kinase-like domain superfamily, Pyruvate/Phosphoenolpyruvate kinase-like domain superfamily	GO:0003824		ICL/PEPM domain			Pyruvate/Phosphoenolpyruvate kinase-like domain superfamily
g69	1	262166	263358									121	0.83
g70	1	263751	264972									322	0.31	NmrA-like family	NmrA-like domain, NAD(P)-binding domain superfamily		Reactome: R-HSA-70635				NAD(P)-binding domain superfamily
g71	1	270160	274542									1460	1.71	PIF1-like helicase, Helitron helicase-like domain at N-terminus	P-loop containing nucleoside triphosphate hydrolase, DNA helicase Pif1-like, Helitron helicase-like domain	GO:0000723|GO:0003678|GO:0006281					P-loop containing nucleoside triphosphate hydrolase, P-loop containing nucleoside triphosphate hydrolase
g72	1	275595	276401									268	0.75	Glycerophosphoryl diester phosphodiesterase family	PLC-like phosphodiesterase, TIM beta/alpha-barrel domain superfamily, Glycerophosphodiester phosphodiesterase domain	GO:0006629|GO:0008081			Glycerophosphodiester phosphodiesterase domain		PLC-like phosphodiesterase, TIM beta/alpha-barrel domain superfamily
g73	1	279593	281224									543	0.74	DDE superfamily endonuclease, helix-turn-helix, Psq domain, Tc5 transposase DNA-binding domain	DDE superfamily endonuclease domain, HTH CenpB-type DNA-binding domain, DNA binding HTH domain, Psq-type, Homeobox-like domain superfamily	GO:0003676|GO:0003677			HTH CenpB-type DNA-binding domain	HTH CenpB-type DNA-binding domain	Homeobox-like domain superfamily
g74	1	284342	286061		11		6	6	11			541	1.66	Sugar (and other) transporter	Major facilitator, sugar transporter-like, Sugar/inositol transporter, Sugar transporter, conserved site, MFS transporter superfamily, Major facilitator superfamily domain	GO:0016021|GO:0022857|GO:0055085|GO:0016020|GO:0022857|GO:0055085|GO:0022857	Reactome: R-HSA-189200		Major facilitator superfamily domain		MFS transporter superfamily	Sugar/inositol transporter
g75	1	287988	291187									990	1.41	Protein of unknown function (DUF917), Hydantoinase/oxoprolinase, Hydantoinase/oxoprolinase N-terminal region	Protein of unknown function DUF917, ATPase, nucleotide binding domain, Hydantoinase A/oxoprolinase, Hydantoinaseoxoprolinase, N-terminal, Protein of unknown function DUF917, N-terminal	GO:0016787	Reactome: R-HSA-174403|Reactome: R-HSA-5578998				ATPase, nucleotide binding domain, ATPase, nucleotide binding domain
g76	1	291870	293868		10		5	6	10			557	0.54	Permease for cytosine/purines, uracil, thiamine, allantoin	Nucleobase cation symporter-1, NCS1, Purine-cytosine permease superfamily, Purine-cytosine permease	GO:0016020|GO:0022857|GO:0055085						Nucleobase cation symporter-1, NCS1
g77	1	294486	296846		3		2	2				689	1.89	Fungal specific transcription factor domain	Transcription factor domain, fungi, Zn(2)-C6 fungal-type DNA-binding domain, Zn(2)-C6 fungal-type DNA-binding domain superfamily	GO:0003677|GO:0005634|GO:0006351|GO:0008270|GO:0000981|GO:0006355|GO:0008270|GO:0042025		Zn(2)-C6 fungal-type DNA-binding domain	Zn(2)-C6 fungal-type DNA-binding domain	Transcription factor domain, fungi	Zn(2)-C6 fungal-type DNA-binding domain superfamily
g78	1	297481	298338									285	1.4	alpha/beta hydrolase fold	Alpha/beta hydrolase fold-1, Alpha/Beta hydrolase fold						Alpha/Beta hydrolase fold
g79	1	299058	300249									374	1.07	Fungal specific transcription factor domain	Transcription factor domain, fungi	GO:0003677|GO:0005634|GO:0006351|GO:0008270				Transcription factor domain, fungi
g80	1	301945	302446	1		1	1			Effector	0.871	130	6.15	CVNH domain	Cyanovirin-N, Cyanovirin-N superfamily					Cyanovirin-N	Cyanovirin-N superfamily
g81	1	303802	306400									365	1.92		Nucleoside phosphorylase superfamily	GO:0003824|GO:0009116
g82	1	308184	309638		1		1	1	1			468	1.07
g83	1	311847	312818	1		1	1			Non-effector	0.527	323	2.48	Domain of unknown function (DUF1996)	Domain of unknown function DUF1996
g84	1	313345	314355									336	2.68	Proline racemase	Proline racemase family								Proline racemase family
g85	1	314631	315867	1		1	1		1			362	1.38	FAD dependent oxidoreductase	D-amino-acid oxidase, FAD dependent oxidoreductase, D-amino acid oxidase, conserved site	GO:0003884|GO:0046416|GO:0071949|GO:0016491|GO:0055114|GO:0003884|GO:0055114	Reactome: R-HSA-389661|Reactome: R-HSA-9033241						D-amino-acid oxidase
g86	1	316671	317582									303	2.97	Protein kinase domain	Protein kinase domain, Protein kinase-like domain superfamily	GO:0004672|GO:0005524|GO:0006468			Protein kinase domain		Protein kinase-like domain superfamily
g87	1	319698	322187									336	1.49
g88	1	329461	331014									270	2.22
g89	1	332346	332876									176	3.98		Ankyrin repeat-containing domain, Ankyrin repeat-containing domain superfamily				Ankyrin repeat-containing domain		Ankyrin repeat-containing domain superfamily
g90	1	335943	336680									245	0.41	Ankyrin repeat	Ankyrin repeat, Ankyrin repeat-containing domain superfamily, F-box-like domain superfamily, Ankyrin repeat-containing domain	GO:0005515			Ankyrin repeat-containing domain, Ankyrin repeat	Ankyrin repeat, Ankyrin repeat	F-box-like domain superfamily, Ankyrin repeat-containing domain superfamily
g91	1	337176	339122		6		3	4	5			550	1.64	Cytochrome b5-like Heme/Steroid binding domain, Fatty acid desaturase	Cytochrome b5-like heme/steroid binding domain superfamily, Cytochrome b5-like heme/steroid binding domain, Fatty acid desaturase domain, Fatty acid desaturase	GO:0006629|GO:0006629|GO:0016021|GO:0016491			Cytochrome b5-like heme/steroid binding domain	Cytochrome b5-like heme/steroid binding domain	Cytochrome b5-like heme/steroid binding domain superfamily
g92	1	341168	343327									573	0.52	2OG-Fe(II) oxygenase superfamily, Alpha/beta hydrolase family, non-haem dioxygenase in morphine synthesis N-terminal	Alpha/Beta hydrolase fold, Oxoglutarate/iron-dependent dioxygenase, Epoxide hydrolase-like, Isopenicillin N synthase-like, Alpha/beta hydrolase fold-1, Non-haem dioxygenase N-terminal domain	GO:0016491|GO:0055114|GO:0003824			Oxoglutarate/iron-dependent dioxygenase		Alpha/Beta hydrolase fold
g93	1	343573	344572		2		2	1				302	1.66	Fungal specific transcription factor domain	Transcription factor domain, fungi	GO:0003677|GO:0005634|GO:0006351|GO:0008270				Transcription factor domain, fungi
g94	1	346010	346325									72
g95	1	346634	347068									144	1.39
g96	1	348982	349317									111	3.6
g97	1	351178	352782									534	1.31	Amidohydrolase family	Amidohydrolase 3, Metal-dependent hydrolase, composite domain superfamily, Metal-dependent hydrolase, YtcJ like	GO:0016810		YtcJ like			Metal-dependent hydrolase, composite domain superfamily, Metal-dependent hydrolase
g98	1	353493	355080		12		6	7	11			513	2.53	Major Facilitator Superfamily	Major facilitator superfamily, MFS transporter superfamily	GO:0022857|GO:0055085					MFS transporter superfamily
g99	1	355425	357277	1		1	1		1			586	1.19	Carboxylesterase family	Alpha/Beta hydrolase fold, Carboxylesterase, type B						Alpha/Beta hydrolase fold
g100	1	357777	359474		10		5	6	10			565	1.42	Major Facilitator Superfamily	MFS transporter superfamily, Major facilitator superfamily	GO:0022857|GO:0055085					MFS transporter superfamily
g101	1	361526	361861									111	1.8
g102	1	363193	364695									237	0.42
g103	1	365277	367139									588	1.36	F-box domain	F-box domain, F-box-like domain superfamily	GO:0005515					F-box-like domain superfamily
g104	1	367830	369179									449	1.11
g105	1	369343	370398		1		1	1				351	1.14	Inositol monophosphatase family	Inositol monophosphatase-like	GO:0046855
g106	1	372752	373395									179	1.12
g107	1	378917	379492									175	0.57
g108	1	386447	387423									233	2.58
g109	1	389394	392123									840	0.48	BRO1-like domain, ALIX V-shaped domain binding to HIV	BRO1 domain, BRO1 domain superfamily, ALIX V-shaped domain	GO:0005515			BRO1 domain	BRO1 domain
g110	1	392311	393312									333	1.2	NAD dependent epimerase/dehydratase family	NAD-dependent epimerase/dehydratase, NAD(P)-binding domain superfamily	GO:0003824					NAD(P)-binding domain superfamily
g111	1	394103	394891									262
g112	1	396624	398286									520	0.19	SPFH domain / Band 7 family	Flotillin family, Band 7 domain, Band 7/SPFH domain superfamily		Reactome: R-HSA-8849932				Band 7/SPFH domain superfamily		Flotillin family
g113	1	398782	400623									597	0.67	Las17-binding protein actin regulator	Ysc84 actin-binding domain
g114	1	401332	402129									265	1.13	Serine hydrolase (FSH1)	Alpha/Beta hydrolase fold, Serine hydrolase FSH						Alpha/Beta hydrolase fold
g115	1	409070	409747									225	1.33	Vesiculovirus phosphoprotein
g116	1	411866	413540									540	0.56
g117	1	419479	423168									1195	0.59
g118	1	423554	425282	1	1	1	1	1	1			525	1.33	Eukaryotic aspartyl protease	Aspartic peptidase domain superfamily, Peptidase family A1 domain				Peptidase family A1 domain		Aspartic peptidase domain superfamily
g119	1	426179	427330									383	1.31	Glycosyl hydrolase family 47	Seven-hairpin glycosidases, Glycoside hydrolase family 47, Six-hairpin glycosidase-like superfamily	GO:0004571|GO:0005509|GO:0016020|GO:0003824					Seven-hairpin glycosidases
g120	1	428523	429915									196	1.53	Domain of unknown function (DUF3425)	Protein of unknown function DUF3425
g121	1	430802	431939									361	3.05	Alcohol dehydrogenase GroES-like domain, Zinc-binding dehydrogenase	Alcohol dehydrogenase, N-terminal, Alcohol dehydrogenase, zinc-type, conserved site, Alcohol dehydrogenase, C-terminal, GroES-like superfamily, NAD(P)-binding domain superfamily	GO:0055114|GO:0008270|GO:0016491|GO:0055114	Reactome: R-HSA-71384				GroES-like superfamily, NAD(P)-binding domain superfamily
g122	1	432195	432690									131	0.76	6-O-methylguanine DNA methyltransferase, DNA binding domain	Methylated-DNA-[protein]-cysteine S-methyltransferase, DNA binding, Winged helix-like DNA-binding domain superfamily, Methylated DNA-protein cysteine methyltransferase, DNA binding domain	GO:0003824|GO:0006281	Reactome: R-HSA-5657655	Methylated-DNA-[protein]-cysteine S-methyltransferase, DNA binding			Methylated DNA-protein cysteine methyltransferase, DNA binding domain
g123	1	433284	438606									1722	0.35	Kinesin motor domain	Kinesin-like protein, Kinesin motor domain, conserved site, P-loop containing nucleoside triphosphate hydrolase, Kinesin motor domain, Kinesin motor domain superfamily	GO:0003777|GO:0007018|GO:0003777|GO:0005524|GO:0007018|GO:0003777|GO:0005524|GO:0007018|GO:0008017	Reactome: R-HSA-6811434|Reactome: R-HSA-983189		Kinesin motor domain	Kinesin motor domain	P-loop containing nucleoside triphosphate hydrolase		Kinesin-like protein
g124	1	442750	444780									676	0.3	ERCC4 domain	EME1/EME2, C-terminal domain, Mms4/EME1/EME2, ERCC4 domain	GO:0005634|GO:0006281|GO:0048476|GO:0003677|GO:0004518	Reactome: R-HSA-5693568|Reactome: R-HSA-6783310, Reactome: R-HSA-6783310			ERCC4 domain			Mms4/EME1/EME2
g125	1	444833	450361		2		2	1				1634	0.24	Histidine phosphatase superfamily (branch 1), Protein of unknown function (DUF3659), Protein of unknown function (DUF3659), Protein of unknown function (DUF3659), Protein of unknown function (DUF3659), Protein of unknown function (DUF3659), Protein of unknown function (DUF3659), Protein of unknown function (DUF3659), Protein of unknown function (DUF3659), Protein of unknown function (DUF3659), Pr…	Histidine phosphatase superfamily, clade-1, Histidine phosphatase superfamily, Protein of unknown function DUF3659, Phosphoglycerate/bisphosphoglycerate mutase, active site	GO:0003824		Histidine phosphatase superfamily, clade-1		Histidine phosphatase superfamily, clade-1	Histidine phosphatase superfamily
g126	1	451411	452424									337	0.3	Protein of unknown function (DUF3659), Protein of unknown function (DUF3659)	Protein of unknown function DUF3659
g127	1	453388	453929									135
g128	1	454332	454982	1		1	1			Non-effector	0.63	200	0.5
g129	1	455529	456686									322
g130	1	457978	459024									348	0.57	WLM domain	WLM domain, Ubiquitin-like domain superfamily				WLM domain		Ubiquitin-like domain superfamily
g131	1	459140	460383									397	2.52	Carbon-nitrogen hydrolase	Carbon-nitrogen hydrolase, Carbon-nitrogen hydrolase superfamily	GO:0006807			Carbon-nitrogen hydrolase		Carbon-nitrogen hydrolase superfamily
g132	1	461127	463445									723	0.55	Calcineurin-like phosphoesterase, Mre11 DNA-binding presumed domain	Mre11, DNA-binding domain superfamily, Mre11 nuclease, N-terminal metallophosphatase domain, Mre11, DNA-binding, Calcineurin-like phosphoesterase domain, ApaH type, DNA double-strand break repair protein Mre11, Metallo-dependent phosphatase-like	GO:0004519|GO:0005634|GO:0006302|GO:0030145|GO:0016787|GO:0004519|GO:0006302|GO:0008408|GO:0030870	Reactome: R-HSA-1834949|Reactome: R-HSA-2559586|Reactome: R-HSA-3270619|Reactome: R-HSA-5685938|Reactome: R-HSA-5685939|Reactome: R-HSA-5685942|Reactome: R-HSA-5693548|Reactome: R-HSA-5693554|Reactome: R-HSA-5693565|Reactome: R-HSA-5693568|Reactome: R-HSA-5693571|Reactome: R-HSA-5693579|Reactome: R-HSA-5693607|Reactome: R-HSA-5693616|Reactome: R-HSA-6804756|Reactome: R-HSA-69473|Reactome: R-HSA-9…	Mre11 nuclease, N-terminal metallophosphatase domain		Mre11, DNA-binding		DNA double-strand break repair protein Mre11
g133	1	464999	466633									544	1.84		Leucine-rich repeat domain superfamily
g134	1	467379	469217		11		6	6	11			577	1.73	Amino acid permease	Amino acid permease/ SLC12A domain, Amino acid permease, conserved site	GO:0016020|GO:0055085|GO:0006865|GO:0016021|GO:0055085
g135	1	472637	474502	1		1	1			Non-effector	0.971	621	0.81	Glycosyl hydrolase family 1, Glycosyl hydrolase family 1	Glycoside hydrolase family 1, Glycoside hydrolase superfamily	GO:0004553|GO:0005975					Glycoside hydrolase superfamily		Glycoside hydrolase family 1
g136	1	477360	478425									101
g137	1	480048	480877	1		1	1			Effector	0.811	226
g138	1	482723	483845		1		1	1	1			284	2.82	Domain of unknown function (DUF3328)	Mycotoxin biosynthesis protein UstYa-like	GO:0043386							Mycotoxin biosynthesis protein UstYa-like
g139	1	484514	485642									342	1.46	NMT1/THI5 like	SsuA/THI5-like, NMT1/THI5 family	GO:0009228							NMT1/THI5 family
g140	1	491258	492296		1		1	1	1			310	0.97	Tyrosine phosphatase family	Protein-tyrosine phosphatase-like, Atypical dual-specificity phosphatase Siw14-like, Protein-tyrosine phosphatase, active site	GO:0004725|GO:0016311					Protein-tyrosine phosphatase-like
g141	1	493644	494171		3		2	2	2			141	0.71
g142	1	494823	495550									207	2.9	Fungal Zn(2)-Cys(6) binuclear cluster domain	Zn(2)-C6 fungal-type DNA-binding domain superfamily, Zn(2)-C6 fungal-type DNA-binding domain	GO:0000981|GO:0006355|GO:0008270|GO:0042025		Zn(2)-C6 fungal-type DNA-binding domain	Zn(2)-C6 fungal-type DNA-binding domain	Zn(2)-C6 fungal-type DNA-binding domain	Zn(2)-C6 fungal-type DNA-binding domain superfamily
g143	1	502589	503305		1		1	1	1			191		Phosphate transport (Pho88)	SRP-independent targeting protein 3	GO:0005783|GO:0045047							SRP-independent targeting protein 3
g144	1	503823	505079									382	2.36	XPA protein C-terminus	XPA, XPA, conserved site, XPA, C-terminal, Putative DNA-binding domain superfamily, XPA domain superfamily	GO:0003684|GO:0006289|GO:0042025	Reactome: R-HSA-5696395|Reactome: R-HSA-5696400|Reactome: R-HSA-6781823|Reactome: R-HSA-6782135				Putative DNA-binding domain superfamily	XPA	XPA
g145	1	505975	508543									823	1.09	Striatin family, WD domain, G-beta repeat, WD domain, G-beta repeat, WD domain, G-beta repeat, WD domain, G-beta repeat	WD40-repeat-containing domain, WD40 repeat, WD40/YVTN repeat-like-containing domain superfamily, WD40-repeat-containing domain superfamily, Striatin, N-terminal, G-protein beta WD-40 repeat	GO:0005515			WD40-repeat-containing domain, WD40-repeat-containing domain, WD40 repeat, WD40 repeat	WD40 repeat, WD40 repeat, WD40 repeat, WD40 repeat, WD40 repeat, WD40 repeat, WD40 repeat	WD40-repeat-containing domain superfamily
g146	1	509792	510777									296	1.01	alpha/beta hydrolase fold	Alpha/beta hydrolase fold-1, Alpha/Beta hydrolase fold						Alpha/Beta hydrolase fold
g147	1	510970	511787	1		1	1			Effector	0.717	255	3.14
g148	1	513027	514996		12		6	7	10			543	0.74	Major Facilitator Superfamily	MFS transporter superfamily, Major facilitator superfamily	GO:0022857|GO:0055085					MFS transporter superfamily
g149	1	516356	517596									379		Taurine catabolism dioxygenase TauD, TfdA family	TauD/TfdA-like domain, Taurine dioxygenase TauD-like superfamily	GO:0016491|GO:0055114	Reactome: R-HSA-71262
g150	1	517889	519385		3	1	2	2	3			481	0.21		Integral inner nuclear membrane protein ima1	GO:0071765							Integral inner nuclear membrane protein ima1
g151	1	520682	521524		2		2	1	2			280	0.36	DUF2407 C-terminal domain, DUF2407 ubiquitin-like domain	Domain of unknown function DUF2407 C-terminal, Homocysteine-responsive endoplasmic reticulum-resident ubiquitin-like domain member 1 /2, Ubiquitin-like domain superfamily, Domain of unknown function DUF2407 N-terminal						Ubiquitin-like domain superfamily		Homocysteine-responsive endoplasmic reticulum-resident ubiquitin-like domain member 1 /2, Homocysteine-responsive endoplasmic reticulum-resident ubiquitin-like domain member 1 /2
g152	1	522099	525439									1094	1.1	DSHCT (NUC185) domain, Helicase conserved C-terminal domain, rRNA-processing arch domain, DEAD/DEAH box helicase	P-loop containing nucleoside triphosphate hydrolase, ATP-dependent RNA helicase Ski2, C-terminal, Helicase, C-terminal, ATP-dependent RNA helicase Ski2-like, Helicase superfamily 1/2, ATP-binding domain, rRNA-processing arch domain, DEAD/DEAH box helicase domain	GO:0003723|GO:0003724|GO:0006401|GO:0003676|GO:0005524			Helicase, C-terminal, Helicase superfamily 1/2, ATP-binding domain	Helicase superfamily 1/2, ATP-binding domain, ATP-dependent RNA helicase Ski2, C-terminal, Helicase, C-terminal	P-loop containing nucleoside triphosphate hydrolase
g153	1	526130	526564		1		1	1	1			97		Cytochrome c oxidase subunit VIIc	Cytochrome c oxidase subunit VIIc, Cytochrome c oxidase subunit VIIc superfamily	GO:0004129	Reactome: R-HSA-5628897|Reactome: R-HSA-611105				Cytochrome c oxidase subunit VIIc superfamily		Cytochrome c oxidase subunit VIIc
g154	1	526848	528323									491	1.02	PPR repeat, PPR repeat	Pentatricopeptide repeat, Tetratricopeptide-like helical domain superfamily	GO:0005515			Pentatricopeptide repeat, Pentatricopeptide repeat, Pentatricopeptide repeat			Pentatricopeptide repeat
g155	1	529349	530146									248	0.81	Mitochondrial ribosomal protein S25	Mitochondrial ribosomal protein S25	GO:0003735|GO:0005763							Mitochondrial ribosomal protein S25
g156	1	530264	531176		3	1	2	2	4			284	1.06	Oligosaccharide biosynthesis protein Alg14 like	Oligosaccharide biosynthesis protein Alg14-like	GO:0006488	Reactome: R-HSA-446193|Reactome: R-HSA-5633231						Oligosaccharide biosynthesis protein Alg14-like
g157	1	532528	535074									554	0.72	FAD dependent oxidoreductase	FAD/NAD(P)-binding domain superfamily, FAD dependent oxidoreductase	GO:0016491|GO:0055114					FAD/NAD(P)-binding domain superfamily
g158	1	535969	540429									1460	0.68	Inositol polyphosphate kinase	Inositol polyphosphate kinase, Inositol polyphosphate kinase superfamily	GO:0016301|GO:0032958							Inositol polyphosphate kinase
g159	1	545951	548995									1014	0.89
g160	1	549962	555457									1831	0.55		Leucine-rich repeat, Leucine-rich repeat domain superfamily, Leucine-rich repeat, typical subtype	GO:0005515			Leucine-rich repeat, Leucine-rich repeat, Leucine-rich repeat, Leucine-rich repeat, Leucine-rich repeat, Leucine-rich repeat, Leucine-rich repeat, Leucine-rich repeat, Leucine-rich repeat, Leucine-rich repeat, Leucine-rich repeat, Leucine-rich repeat, Leucine-rich repeat, Leucine-rich repeat	Leucine-rich repeat, typical subtype, Leucine-rich repeat, typical subtype, Leucine-rich repeat, typical subtype, Leucine-rich repeat, typical subtype, Leucine-rich repeat, typical subtype
g161	1	557245	560412									1055	0.57	Rab-GTPase-TBC domain	Rab-GTPase-TBC domain superfamily, Rab-GTPase-TBC domain				Rab-GTPase-TBC domain	Rab-GTPase-TBC domain	Rab-GTPase-TBC domain superfamily, Rab-GTPase-TBC domain superfamily
g162	1	561025	562293									393	1.53	Chorismate synthase	Chorismate synthase, Chorismate synthase AroC superfamily, Chorismate synthase, conserved site	GO:0004107|GO:0009073	KEGG: 00400+4.2.3.5|MetaCyc: PWY-6163	Chorismate synthase			Chorismate synthase AroC superfamily	Chorismate synthase	Chorismate synthase
g163	1	563270	564525									399	0.75	Biotin/lipoate A/B protein ligase family	Biotinyl protein ligase (BPL) and lipoyl protein ligase (LPL), catalytic domain, Lipoyltransferase/lipoate-protein ligase	GO:0006464|GO:0009249	KEGG: 00785+2.3.1.181|MetaCyc: PWY-6987|MetaCyc: PWY-7382, KEGG: 00785+6.3.1.20|Reactome: R-HSA-389661		Biotinyl protein ligase (BPL) and lipoyl protein ligase (LPL), catalytic domain				Lipoyltransferase/lipoate-protein ligase
g164	1	574773	578678									1245	0.72	Protein kinase domain, Protein kinase domain	Protein kinase domain, Protein kinase-like domain superfamily, Protein kinase, ATP binding site	GO:0004672|GO:0005524|GO:0006468|GO:0005524			Protein kinase domain	Protein kinase domain	Protein kinase-like domain superfamily
g165	1	579521	581039		1		1	1	1			473	1.69	Glycosyltransferase Family 4, Glycosyl transferases group 1	Glycosyltransferase subfamily 4-like, N-terminal domain, Mannosyltransferase ALG2, Glycosyl transferase, family 1	GO:0004378|GO:0006486	Reactome: R-HSA-446193|Reactome: R-HSA-4549349, KEGG: 00510+2.4.1.257+2.4.1.132|KEGG: 00513+2.4.1.257+2.4.1.132|Reactome: R-HSA-446193|Reactome: R-HSA-4549349						Mannosyltransferase ALG2
g166	1	581561	582437									274	1.09	Enoyl-CoA hydratase/isomerase	ClpP/crotonase-like domain superfamily, Enoyl-CoA hydratase/isomerase	GO:0003824					ClpP/crotonase-like domain superfamily
g167	1	583130	586228		2		2	1				978	1.64	Fungal Zn(2)-Cys(6) binuclear cluster domain, Fungal specific transcription factor domain	Zn(2)-C6 fungal-type DNA-binding domain, Transcription factor domain, fungi, Zn(2)-C6 fungal-type DNA-binding domain superfamily	GO:0000981|GO:0006355|GO:0008270|GO:0042025|GO:0003677|GO:0005634|GO:0006351|GO:0008270		Zn(2)-C6 fungal-type DNA-binding domain	Zn(2)-C6 fungal-type DNA-binding domain	Transcription factor domain, fungi, Zn(2)-C6 fungal-type DNA-binding domain	Zn(2)-C6 fungal-type DNA-binding domain superfamily
g168	1	588308	590577									652	1.99	Fungal Zn(2)-Cys(6) binuclear cluster domain, Fungal specific transcription factor domain	Zn(2)-C6 fungal-type DNA-binding domain superfamily, Zn(2)-C6 fungal-type DNA-binding domain, Fungal transcription factor	GO:0000981|GO:0006355|GO:0008270|GO:0042025		Zn(2)-C6 fungal-type DNA-binding domain	Zn(2)-C6 fungal-type DNA-binding domain	Zn(2)-C6 fungal-type DNA-binding domain	Zn(2)-C6 fungal-type DNA-binding domain superfamily
g169	1	595252	596400		1		1	1	1			382
g170	1	597581	598364									245	0.41	alpha/beta hydrolase fold	Alpha/Beta hydrolase fold, Alpha/beta hydrolase fold-3	GO:0016787					Alpha/Beta hydrolase fold
g171	1	600538	604515		1		1	1				1325	0.68
g172	1	604901	605402		1		1	1	1			146	4.79	Bladder cancer-related protein BC10	Bladder cancer-related BC10					Bladder cancer-related BC10			Bladder cancer-related BC10
g173	1	607551	612379									1592	0.31		WD40/YVTN repeat-like-containing domain superfamily, WD40-repeat-containing domain superfamily	GO:0005515					WD40-repeat-containing domain superfamily
g174	1	614961	616087		6		3	4	5			343	1.46	PAP2 superfamily	Inositolphosphotransferase Aur1/Ipt1
g175	1	616434	617626									376	1.6	Zinc-binding dehydrogenase	Alcohol dehydrogenase, C-terminal, GroES-like superfamily, NAD(P)-binding domain superfamily, Polyketide synthase, enoylreductase domain	GO:0055114|GO:0016491				Polyketide synthase, enoylreductase domain	GroES-like superfamily, NAD(P)-binding domain superfamily
g176	1	619176	621147									624		R3H domain, RNA recognition motif. (a.k.a. RRM, RBD, or RNP domain)	RNA recognition motif domain, R3H domain superfamily, Nucleotide-binding alpha-beta plait domain superfamily, RNA-binding domain superfamily, R3H domain, Pin4-like, RNA recognition motif	GO:0003676		Pin4-like, RNA recognition motif	RNA recognition motif domain, R3H domain	RNA recognition motif domain, R3H domain	R3H domain superfamily, RNA-binding domain superfamily
g177	1	626817	627369									162	1.23
g178	1	631262	632121									143	0.7	Core histone H2A/H2B/H3/H4, C-terminus of histone H2A	Histone H2A, Histone H2A/H2B/H3, Histone-fold, Histone H2A, C-terminal domain	GO:0000786|GO:0003677|GO:0046982	Reactome: R-HSA-3214858	Histone H2A		Histone H2A	Histone-fold
g179	1	632772	633650									292	3.42
g180	1	639162	639971		5		3	3	5			215	0.47	ER lumen protein retaining receptor	ER lumen protein retaining receptor	GO:0006621|GO:0016021|GO:0046923	Reactome: R-HSA-6807878|Reactome: R-HSA-6811434						ER lumen protein retaining receptor
g181	1	640579	641190									188		Transcription initiation factor TFIID 23-30kDa subunit	Transcription initiation factor TFIID, 23-30kDa subunit	GO:0005634|GO:0006352	Reactome: R-HSA-167161|Reactome: R-HSA-167162|Reactome: R-HSA-167172|Reactome: R-HSA-3214847|Reactome: R-HSA-5689880|Reactome: R-HSA-674695|Reactome: R-HSA-6804756|Reactome: R-HSA-73776|Reactome: R-HSA-73779|Reactome: R-HSA-75953|Reactome: R-HSA-76042	Transcription initiation factor TFIID, 23-30kDa subunit					Transcription initiation factor TFIID, 23-30kDa subunit
g182	1	641415	641840									91		Ribosomal protein S19	Ribosomal protein S19/S15, Ribosomal protein S19 conserved site, Ribosomal protein S19, superfamily	GO:0003735|GO:0005840|GO:0006412|GO:0003723	Reactome: R-HSA-156827|Reactome: R-HSA-156902|Reactome: R-HSA-1799339|Reactome: R-HSA-192823|Reactome: R-HSA-2408557|Reactome: R-HSA-6791226|Reactome: R-HSA-72649|Reactome: R-HSA-72689|Reactome: R-HSA-72695|Reactome: R-HSA-72702|Reactome: R-HSA-72706|Reactome: R-HSA-72764|Reactome: R-HSA-9010553|Reactome: R-HSA-9633012|Reactome: R-HSA-975956|Reactome: R-HSA-975957				Ribosomal protein S19, superfamily		Ribosomal protein S19/S15
g183	1	642698	643794	1		1	1			Effector	0.612	333	0.6	Cellulase (glycosyl hydrolase family 5)	Glycoside hydrolase superfamily, Glycoside hydrolase, family 5	GO:0004553|GO:0005975					Glycoside hydrolase superfamily
g184	1	644723	645839		1		1	1	1			356	1.12	DnaJ domain, Domain of unknown function (DUF1977)	DnaJ domain, Chaperone J-domain superfamily, Domain of unknown function DUF1977, DnaJ-like			DnaJ domain	DnaJ domain	DnaJ domain	Chaperone J-domain superfamily
g185	1	647195	649702									835	0.36	MINDY deubiquitinase	MINDY deubiquitinase, MINDY deubiquitinase domain	GO:0004843|GO:1990380							MINDY deubiquitinase
g186	1	650612	652232		5		3	3	2			221	0.9		3-oxo-5-alpha-steroid 4-dehydrogenase/very-long-chain enoyl-CoA reductase								3-oxo-5-alpha-steroid 4-dehydrogenase/very-long-chain enoyl-CoA reductase
g187	1	653181	654868		12		6	7	12			511	1.57	Major Facilitator Superfamily	MFS transporter superfamily, Major facilitator superfamily, Major facilitator superfamily domain	GO:0022857|GO:0055085|GO:0022857			Major facilitator superfamily domain		MFS transporter superfamily
g188	1	664005	665020	1		1	1		1			310	0.32	LicD family	Fukutin-related, LicD family								Fukutin-related
g189	1	665489	667454									638	2.04	MutL C terminal dimerisation domain	MutL, C-terminal domain superfamily, MutL, C-terminal domain, regulatory subdomain, DNA mismatch repair protein Mlh3, MutL, C-terminal domain, dimerisation subdomain, DNA mismatch repair protein MutL/Mlh/Pms, MutL, C-terminal, dimerisation	GO:0006298|GO:0006298|GO:0016887|GO:0032300|GO:0005524|GO:0006298	Reactome: R-HSA-912446			MutL, C-terminal, dimerisation	MutL, C-terminal domain superfamily		DNA mismatch repair protein Mlh3, DNA mismatch repair protein MutL/Mlh/Pms
g190	1	668907	670162									384	0.26
g191	1	670564	673834									981	1.73	Vacuolar protein sorting protein 11 C terminal, Region in Clathrin and VPS	Clathrin, heavy chain/VPS, 7-fold repeat, Armadillo-type fold, Vacuolar protein sorting protein 11, C-terminal, Vacuolar protein sorting-associated protein 11, WD40-repeat-containing domain superfamily, Zinc finger, RING-type, Tetratricopeptide-like helical domain superfamily, WD40/YVTN repeat-like-containing domain superfamily	GO:0006886|GO:0016192|GO:0005515			Clathrin, heavy chain/VPS, 7-fold repeat, Zinc finger, RING-type	Clathrin, heavy chain/VPS, 7-fold repeat	Armadillo-type fold, WD40-repeat-containing domain superfamily		Vacuolar protein sorting-associated protein 11
g192	1	682862	684297									287	1.05	Methyltransferase domain	S-adenosyl-L-methionine-dependent methyltransferase						S-adenosyl-L-methionine-dependent methyltransferase
g193	1	685022	686707									561	1.96
g194	1	688292	688924									210	1.9
g195	1	691451	692845									464	2.59		F-box-like domain superfamily	GO:0005515					F-box-like domain superfamily
g196	1	694317	695444	1		1	1			Non-effector	0.501	375	1.87	Pectate lyase	Pectin lyase fold/virulence factor, Pectate lyase, Pectin lyase fold					Pectate lyase	Pectin lyase fold/virulence factor
g197	1	695907	699363		15		8	8	14			1114	1.26	Sodium/calcium exchanger protein, Sodium/calcium exchanger protein, Inner membrane component domain	Sodium/calcium exchanger membrane region, Inner membrane component domain	GO:0016021|GO:0055085	Reactome: R-HSA-425561
g198	1	701117	702340									389	0.77	AAA+ lid domain, ATPase family associated with various cellular activities (AAA), Proteasomal ATPase OB C-terminal domain	P-loop containing nucleoside triphosphate hydrolase, AAA+ ATPase domain, ATPase, AAA-type, conserved site, AAA ATPase, AAA+ lid domain, 26S proteasome regulatory subunit P45-like, ATPase, AAA-type, core, Proteasomal ATPase OB C-terminal domain	GO:0005524|GO:0005737|GO:0016787|GO:0030163	Reactome: R-HSA-1169091|Reactome: R-HSA-1234176|Reactome: R-HSA-1236974|Reactome: R-HSA-1236978|Reactome: R-HSA-174084|Reactome: R-HSA-174113|Reactome: R-HSA-174154|Reactome: R-HSA-174178|Reactome: R-HSA-174184|Reactome: R-HSA-180534|Reactome: R-HSA-180585|Reactome: R-HSA-187577|Reactome: R-HSA-195253|Reactome: R-HSA-202424|Reactome: R-HSA-211733|Reactome: R-HSA-2467813|Reactome: R-HSA-2871837|Re…			AAA+ ATPase domain	P-loop containing nucleoside triphosphate hydrolase	26S proteasome regulatory subunit P45-like
g199	1	703901	704353									150
g200	1	711517	714409									946	0.95	Protein-tyrosine phosphatase, Protein-tyrosine phosphatase, Rhodanese-like domain	PTP type protein phosphatase, Tyrosine specific protein phosphatases domain, Protein-tyrosine phosphatase, active site, Rhodanese-like domain superfamily, Rhodanese-like domain, Protein-tyrosine phosphatase, catalytic, Protein-tyrosine phosphatase-like	GO:0004725|GO:0006470|GO:0016311|GO:0016791|GO:0004725|GO:0016311			PTP type protein phosphatase, Tyrosine specific protein phosphatases domain, Rhodanese-like domain	Rhodanese-like domain, Protein-tyrosine phosphatase, catalytic, PTP type protein phosphatase	Rhodanese-like domain superfamily, Protein-tyrosine phosphatase-like
g201	1	716878	719886									1002	0.7	T-complex protein 11	T-complex 11								T-complex 11
g202	1	720897	724267									979	0.72	Peptidase M1 N-terminal domain, Peptidase family M1 domain, ERAP1-like C-terminal domain	Aminopeptidase N-like , N-terminal, Peptidase M1, membrane alanine aminopeptidase, Peptidase M1, alanine aminopeptidase/leukotriene A4 hydrolase, Aminopeptidase N-type, ERAP1-like C-terminal domain	GO:0008237|GO:0008270|GO:0006508		Aminopeptidase N-type			Aminopeptidase N-like , N-terminal
g203	1	725532	727286	1		1	1			Non-effector	0.99	584	0.68	Carboxylesterase family	Alpha/Beta hydrolase fold, Carboxylesterase type B, active site, Carboxylesterase, type B						Alpha/Beta hydrolase fold
g204	1	729262	730626									454	1.1
g205	1	731640	732393									192	0.52	ARP2/3 complex ARPC3 (21 kDa) subunit	Actin-related protein 2/3 complex subunit 3 superfamily, Actin-related protein 2/3 complex subunit 3	GO:0005856|GO:0005885|GO:0030833|GO:0034314	Reactome: R-HSA-2029482|Reactome: R-HSA-3928662|Reactome: R-HSA-5663213|Reactome: R-HSA-8856828				Actin-related protein 2/3 complex subunit 3 superfamily		Actin-related protein 2/3 complex subunit 3
g206	1	737708	742094		2	1	2	1				1143	0.87	Flavin-binding monooxygenase-like, Flavin-binding monooxygenase-like, Gcd10p family	FAD/NAD(P)-binding domain superfamily, Flavin monooxygenase FMO, Flavin monooxygenase-like, tRNA (adenine(58)-N(1))-methyltransferase non-catalytic subunit TRM6	GO:0050660|GO:0050661|GO:0055114|GO:0004499|GO:0050660|GO:0050661|GO:0055114|GO:0030488|GO:0031515	Reactome: R-HSA-6782315				FAD/NAD(P)-binding domain superfamily
g207	1	744235	747961		11	1	6	6	11			1209	0.83		E3 ubiquitin-protein ligase RBBP6 family	GO:0006397|GO:0016567|GO:0061630	Reactome: R-HSA-983168						E3 ubiquitin-protein ligase RBBP6 family
g208	1	748500	750329		9		5	5	9			575	0.87	Phosphate transporter family	Phosphate transporter	GO:0005315|GO:0006817|GO:0016020	Reactome: R-HSA-427652						Phosphate transporter
g209	1	752846	754389		11		6	6	12			465	2.15	Major Facilitator Superfamily	MFS transporter superfamily, Major facilitator superfamily	GO:0022857|GO:0055085					MFS transporter superfamily
g210	1	755689	755994									80	3.75
g211	1	756234	758567									740	0.41	NUC130/3NT domain, SDA1	Armadillo-type fold, Uncharacterised domain NUC130/133, N-terminal, Sda1, SDA1 domain	GO:0000055|GO:0030036|GO:0042273					Armadillo-type fold		Sda1
g212	1	759962	761245									321	0.93	Mitochondrial carrier protein, Mitochondrial carrier protein, Mitochondrial carrier protein	Mitochondrial substrate/solute carrier, Mitochondrial carrier domain superfamily				Mitochondrial substrate/solute carrier, Mitochondrial substrate/solute carrier, Mitochondrial substrate/solute carrier		Mitochondrial carrier domain superfamily
g213	1	762747	769013									2088	1.92	Ankyrin repeats (3 copies), Ankyrin repeats (3 copies), Ankyrin repeats (3 copies), Ankyrin repeats (3 copies), Ankyrin repeats (3 copies), NACHT domain, Ankyrin repeat	Ankyrin repeat-containing domain superfamily, Ankyrin repeat-containing domain, Ankyrin repeat, NACHT nucleoside triphosphatase, P-loop containing nucleoside triphosphate hydrolase	GO:0005515			Ankyrin repeat, Ankyrin repeat, Ankyrin repeat, Ankyrin repeat, Ankyrin repeat, Ankyrin repeat, Ankyrin repeat, Ankyrin repeat, Ankyrin repeat-containing domain	Ankyrin repeat, Ankyrin repeat, Ankyrin repeat, Ankyrin repeat, Ankyrin repeat, Ankyrin repeat, Ankyrin repeat, Ankyrin repeat, Ankyrin repeat, Ankyrin repeat, Ankyrin repeat, Ankyrin repeat, Ankyrin repeat, Ankyrin repeat, Ankyrin repeat, Ankyrin repeat, Ankyrin repeat, Ankyrin repeat, Ankyrin repeat, Ankyrin repeat, Ankyrin repeat, Ankyrin repeat, Ankyrin repeat	Ankyrin repeat-containing domain superfamily, Ankyrin repeat-containing domain superfamily, P-loop containing nucleoside triphosphate hydrolase, Ankyrin repeat-containing domain superfamily, Ankyrin repeat-containing domain superfamily, Ankyrin repeat-containing domain superfamily, Ankyrin repeat-containing domain superfamily
g214	1	769517	769804									77
g215	1	771435	775191									1181	1.02	Phosphopantetheine attachment site, Male sterility protein, AMP-binding enzyme	AMP-dependent synthetase-like superfamily, ACP-like superfamily, Phosphopantetheine binding ACP domain, L-2-aminoadipate reductase, Amino acid adenylation domain, Male sterility, NAD-binding, Thioester reductase-like domain, AMP-binding, conserved site, AMP-dependent synthetase/ligase, NAD(P)-binding domain superfamily	GO:0004043|GO:0009085|GO:0003824	KEGG: 00300+1.2.1.95|KEGG: 00310+1.2.1.31, Reactome: R-HSA-9640463	Thioester reductase-like domain	Phosphopantetheine binding ACP domain		ACP-like superfamily, NAD(P)-binding domain superfamily	L-2-aminoadipate reductase, Amino acid adenylation domain, Thioester reductase-like domain
g216	1	779790	781829	1		1	1			Non-effector	0.99	679	2.95
g217	1	786330	788560									726	1.52	Ankyrin repeats (3 copies)	Ankyrin repeat-containing domain superfamily, Ankyrin repeat, Ankyrin repeat-containing domain	GO:0005515			Ankyrin repeat, Ankyrin repeat-containing domain, Ankyrin repeat	Ankyrin repeat, Ankyrin repeat, Ankyrin repeat, Ankyrin repeat	Ankyrin repeat-containing domain superfamily, Ankyrin repeat-containing domain superfamily
g218	1	789377	790509									329	0.3	short chain dehydrogenase	NAD(P)-binding domain superfamily, Short-chain dehydrogenase/reductase SDR						NAD(P)-binding domain superfamily
g219	1	791638	794086									530	1.51
g220	1	800078	801905		14		7	8	14			579	0.52	Major Facilitator Superfamily	MFS transporter superfamily, Tetracycline resistance protein/drug resistance transporter, Major facilitator superfamily, Major facilitator superfamily domain	GO:0022857|GO:0055085|GO:0022857			Major facilitator superfamily domain		MFS transporter superfamily		Tetracycline resistance protein/drug resistance transporter
g221	1	801980	803584									534	0.37	alpha/beta hydrolase fold	Alpha/beta hydrolase fold-1, Alpha/Beta hydrolase fold, Dimeric alpha-beta barrel						Alpha/Beta hydrolase fold, Dimeric alpha-beta barrel
g222	1	804526	808452									1275	1.57	RNA dependent RNA polymerase	RNA-dependent RNA polymerase, eukaryotic-type	GO:0003968							RNA-dependent RNA polymerase, eukaryotic-type
g223	1	809010	810126	1	1	1	1	1	1			340	1.76	Autophagy-related protein 27	Autophagy-related protein 27
g224	1	810903	813962									1001	0.3	Spt20 family	Transcription factor Spt20	GO:0000124|GO:0003712
g225	1	814601	815930		1		1	1	1			364
g226	1	816576	818390			1	1					551	1.81		Nucleotide-diphospho-sugar transferases						Nucleotide-diphospho-sugar transferases
g227	1	826677	827825									364	2.2	Zinc finger, C2H2 type	Zinc finger C2H2-type, Zinc finger C2H2 superfamily				Zinc finger C2H2-type	Zinc finger C2H2-type, Zinc finger C2H2-type	Zinc finger C2H2 superfamily
g228	1	832862	834820									652	1.99		Leucine-rich repeat domain superfamily
g229	1	842042	842788		1		1	1	1			248
g230	1	844997	846072		6		3	4	6			289	2.08	GPR1/FUN34/yaaH family	Protein AlcS/PatA, Acetate transporter GPR1/FUN34/SatP family	GO:0016021							Protein AlcS/PatA
g231	1	846824	848419		3		2	2	1			515	0.78	Cytochrome P450	Cytochrome P450, Cytochrome P450 superfamily	GO:0005506|GO:0016705|GO:0020037|GO:0055114					Cytochrome P450 superfamily
g232	1	850899	852293									446	1.35	Aminotransferase class-III	Aminotransferase class-III, Pyridoxal phosphate-dependent transferase, major domain, Pyridoxal phosphate-dependent transferase, Acetylornithine/Succinylornithine transaminase family, Pyridoxal phosphate-dependent transferase domain 1	GO:0008483|GO:0030170|GO:0003824|GO:0006525|GO:0008483		Aminotransferase class-III			Pyridoxal phosphate-dependent transferase	Acetylornithine/Succinylornithine transaminase family
g233	1	852649	854668									578	1.73	Pyridoxal-dependent decarboxylase conserved domain	Pyridoxal phosphate-dependent transferase, major domain, Pyridoxal phosphate-dependent decarboxylase, Glutamate decarboxylase, Pyridoxal phosphate-dependent transferase	GO:0003824|GO:0016831|GO:0019752|GO:0030170|GO:0004351|GO:0006536|GO:0030170	KEGG: 00250+4.1.1.15|KEGG: 00410+4.1.1.15|KEGG: 00430+4.1.1.15|KEGG: 00650+4.1.1.15|MetaCyc: PWY-4321				Pyridoxal phosphate-dependent transferase	Glutamate decarboxylase	Glutamate decarboxylase
g234	1	857902	860171		4		3	2				739	0.68	alpha/beta hydrolase fold, alpha/beta hydrolase fold	Alpha/beta hydrolase fold-3, Alpha/Beta hydrolase fold	GO:0016787					Alpha/Beta hydrolase fold
g235	1	862808	863990	1		1	1			Non-effector	0.991	360	1.11	Cutinase	Cutinase/acetylxylan esterase, Cutinase, monofunctional, Alpha/Beta hydrolase fold	GO:0016787|GO:0005576|GO:0050525				Cutinase/acetylxylan esterase	Alpha/Beta hydrolase fold
g236	1	865028	867943									924	1.08	Calpain family cysteine protease	Peptidase C2, calpain, catalytic domain, Cysteine peptidase, cysteine active site, Papain-like cysteine peptidase superfamily	GO:0004198|GO:0006508	Reactome: R-HSA-1474228	Peptidase C2, calpain, catalytic domain	Peptidase C2, calpain, catalytic domain	Peptidase C2, calpain, catalytic domain	Papain-like cysteine peptidase superfamily
g237	1	870304	871893									529	4.35	TRAF-type zinc finger, Zinc finger, C3HC4 type (RING finger)	Zinc finger, TRAF-type, Zinc finger, C3HC4 RING-type, TRAF-like, Zinc finger, RING/FYVE/PHD-type, TNF receptor-associated factor TRAF, Zinc finger, RING-type, Zinc finger, RING-type, conserved site	GO:0008270|GO:0046872|GO:0005515			Zinc finger, TRAF-type, Zinc finger, RING-type	Zinc finger, RING-type	TRAF-like		TNF receptor-associated factor TRAF
g238	1	872958	876510									1080	0.93	Ubiquitin elongating factor core, U-box domain	U box domain, Zinc finger, RING/FYVE/PHD-type, Ubiquitin conjugation factor E4, core	GO:0004842|GO:0016567|GO:0000151|GO:0006511|GO:0016567|GO:0034450	MetaCyc: PWY-7511		U box domain	U box domain
g239	1	876855	877916									353	1.98	Adenosine/AMP deaminase	Metal-dependent hydrolase, Adenine deaminase type 2, Adenosine/adenine deaminase, Adenosine/AMP deaminase domain, Adenosine/AMP deaminase active site	GO:0000034|GO:0006146|GO:0019239|GO:0009168|GO:0019239	KEGG: 00230+3.5.4.2|MetaCyc: PWY-6610, Reactome: R-HSA-74217	Adenosine/adenine deaminase			Metal-dependent hydrolase	Adenosine/adenine deaminase
g240	1	888684	894864									1175	2.3	Meiosis protein SPO22/ZIP4 like, Fungal Zn(2)-Cys(6) binuclear cluster domain	Zn(2)-C6 fungal-type DNA-binding domain, Zn(2)-C6 fungal-type DNA-binding domain superfamily, Meiosis specific protein Spo22/ZIP4/TEX11	GO:0000981|GO:0006355|GO:0008270|GO:0042025|GO:0051321		Zn(2)-C6 fungal-type DNA-binding domain	Zn(2)-C6 fungal-type DNA-binding domain	Zn(2)-C6 fungal-type DNA-binding domain	Zn(2)-C6 fungal-type DNA-binding domain superfamily
g241	1	896913	901126									1368	1.83	Aldehyde oxidase and xanthine dehydrogenase, a/b hammerhead domain, CO dehydrogenase flavoprotein C-terminal domain, FAD binding domain in molybdopterin dehydrogenase, [2Fe-2S] binding domain, Molybdopterin-binding domain of aldehyde dehydrogenase, 2Fe-2S iron-sulfur cluster binding domain	Aldehyde oxidase/xanthine dehydrogenase, a/b hammerhead, 2Fe-2S ferredoxin, iron-sulphur binding site, 2Fe-2S ferredoxin-like superfamily, CO dehydrogenase flavoprotein, C-terminal, Aldehyde oxidase/xanthine dehydrogenase, molybdopterin binding domain superfamily, FAD-binding domain, PCMH-type, FAD-binding, type PCMH-like superfamily, 2Fe-2S ferredoxin-type iron-sulfur binding domain, Xanthine de…	GO:0051537|GO:0009055|GO:0051536|GO:0016491|GO:0055114|GO:0071949|GO:0050660|GO:0004854|GO:0004855|GO:0050660|GO:0055114|GO:0016491|GO:0046872|GO:0055114|GO:0005506|GO:0016491|GO:0055114	KEGG: 00230+1.17.1.4|MetaCyc: PWY-5497|MetaCyc: PWY-5695|MetaCyc: PWY-6538|MetaCyc: PWY-6596|MetaCyc: PWY-6606|MetaCyc: PWY-6607|MetaCyc: PWY-6608|MetaCyc: PWY-6999|Reactome: R-HSA-74259|Reactome: R-HSA-8851680		FAD-binding domain, PCMH-type, 2Fe-2S ferredoxin-type iron-sulfur binding domain	CO dehydrogenase flavoprotein, C-terminal, Aldehyde oxidase/xanthine dehydrogenase, a/b hammerhead	2Fe-2S ferredoxin-like superfamily, Aldehyde oxidase/xanthine dehydrogenase, molybdopterin binding domain superfamily, FAD-binding, type PCMH-like superfamily, Aldehyde oxidase/xanthine dehydrogenase, a/b hammerhead superfamily, CO dehydrogenase flavoprotein, C-terminal domain superfamily, [2Fe-2S]-binding domain superfamily	Xanthine dehydrogenase, small subunit
g242	1	902017	903497									426	0.7	Aminotransferase class I and II	Pyridoxal phosphate-dependent transferase, major domain, Aminotransferase, class I/classII, Pyridoxal phosphate-dependent transferase, Pyridoxal phosphate-dependent transferase domain 1	GO:0003824|GO:0009058|GO:0030170					Pyridoxal phosphate-dependent transferase
g243	1	904405	905369		1		1	1				302	1.66	Protein kinase domain	Protein kinase domain, Protein kinase, ATP binding site, Protein kinase-like domain superfamily, Serine/threonine-protein kinase, active site	GO:0004672|GO:0005524|GO:0006468|GO:0005524|GO:0004672|GO:0006468			Protein kinase domain	Protein kinase domain	Protein kinase-like domain superfamily
g244	1	907852	912553									1497	1.4	PHD-zinc-finger like domain, jmjN domain, JmjC domain, hydroxylase	JmjN domain, Extended PHD (ePHD) domain, Zinc finger, PHD-type, Zinc finger, RING/FYVE/PHD-type, JmjC domain		Reactome: R-HSA-3214842		JmjN domain, Extended PHD (ePHD) domain, JmjC domain	Zinc finger, PHD-type, JmjN domain, JmjC domain
g245	1	915954	917759	1	1	1	1	1	1			585	1.2		Histidine phosphatase superfamily						Histidine phosphatase superfamily
g246	1	918182	920055									547	1.65	Heterokaryon incompatibility protein (HET)	Heterokaryon incompatibility
g247	1	920795	922559									570	0.35	bZIP transcription factor	Basic-leucine zipper domain	GO:0003700|GO:0006355			Basic-leucine zipper domain	Basic-leucine zipper domain
g248	1	926171	928860									825	0.36	Uncharacterized conserved protein (DUF2293)	Domain of unknown function DUF2293
g249	1	929273	933068									1240	0.81	NUC173 domain	Uncharacterised domain NUC173, Armadillo-type fold						Armadillo-type fold
g250	1	933413	934130									202	1.49	Calcineurin-like phosphoesterase superfamily domain	Vacuolar protein sorting-associated protein 29, Calcineurin-like phosphoesterase domain, lpxH-type, Phosphodiesterase MJ0936/Vps29, Metallo-dependent phosphatase-like	GO:0030904|GO:0042147	Reactome: R-HSA-3238698	Vacuolar protein sorting-associated protein 29				Phosphodiesterase MJ0936/Vps29	Phosphodiesterase MJ0936/Vps29, Vacuolar protein sorting-associated protein 29
g251	1	934519	936668									678	0.44	Shugoshin C terminus, Shugoshin N-terminal coiled-coil region	Shugoshin, C-terminal, Shugoshin, N-terminal coiled-coil domain	GO:0000775|GO:0005634|GO:0045132	Reactome: R-HSA-141444|Reactome: R-HSA-2467813|Reactome: R-HSA-2500257|Reactome: R-HSA-5663220|Reactome: R-HSA-68877|Reactome: R-HSA-9648025
g252	1	936976	937506									143		DASH complex subunit Dad2	DASH complex subunit Dad2	GO:0000278|GO:0042729|GO:0072686							DASH complex subunit Dad2
g253	1	939416	941558									683	0.15
g254	1	942865	944241		1		1	1	1			458
g255	1	947514	949817		1		1	1	1			693	0.29
g256	1	952732	954803									674	0.89	Helicase associated domain (HA2), Oligonucleotide/oligosaccharide-binding (OB)-fold, Helicase conserved C-terminal domain	Helicase-associated domain, P-loop containing nucleoside triphosphate hydrolase, Helicase superfamily 1/2, ATP-binding domain, Helicase, C-terminal, Domain of unknown function DUF1605, DNA/RNA helicase, ATP-dependent, DEAH-box type, conserved site	GO:0004386			Helicase superfamily 1/2, ATP-binding domain, Helicase, C-terminal	Helicase-associated domain, Helicase superfamily 1/2, ATP-binding domain, Helicase, C-terminal	P-loop containing nucleoside triphosphate hydrolase
g257	1	955264	956696									416		CUE domain	Ubiquitin system component CUE, Cue5/Don1, CUE domain, UBA-like superfamily	GO:0005515		Cue5/Don1, CUE domain	Ubiquitin system component CUE	Ubiquitin system component CUE	UBA-like superfamily
g258	1	958880	963112									1035	1.45	SPX domain, SPX domain, Ankyrin repeats (3 copies), Ankyrin repeats (many copies), Glycerophosphoryl diester phosphodiesterase family	Ankyrin repeat, Glycerophosphodiester phosphodiesterase domain, PLC-like phosphodiesterase, TIM beta/alpha-barrel domain superfamily, Ankyrin repeat-containing domain, SPX domain, Ankyrin repeat-containing domain superfamily	GO:0005515|GO:0006629|GO:0008081			Ankyrin repeat, Ankyrin repeat, Ankyrin repeat, Glycerophosphodiester phosphodiesterase domain, Ankyrin repeat-containing domain, SPX domain, Ankyrin repeat, Ankyrin repeat	Ankyrin repeat, Ankyrin repeat, Ankyrin repeat, Ankyrin repeat, Ankyrin repeat, Ankyrin repeat, Ankyrin repeat, Ankyrin repeat	PLC-like phosphodiesterase, TIM beta/alpha-barrel domain superfamily, Ankyrin repeat-containing domain superfamily
g259	1	963267	964046		4		2	3	3			240
g260	1	964355	965061		1		1	1				215		Cytochrome oxidase complex assembly protein 1	Cytochrome c oxidase assembly factor 1, Cytochrome c oxidase assembly factor 1, fungi	GO:0033617							Cytochrome c oxidase assembly factor 1, fungi
g261	1	965260	966432									390	0.51	Ribosomal protein L3	Ribosomal protein L3, bacterial/organelle-type, Ribosomal protein L3, Translation protein, beta-barrel domain superfamily	GO:0003735|GO:0005840|GO:0006412	Reactome: R-HSA-5368286|Reactome: R-HSA-5389840|Reactome: R-HSA-5419276				Translation protein, beta-barrel domain superfamily	Ribosomal protein L3, bacterial/organelle-type	Ribosomal protein L3, bacterial/organelle-type
g262	1	966601	967323									224	0.45	PITH domain	PITH domain superfamily, PITH domain, Galactose-binding-like domain superfamily				PITH domain		Galactose-binding-like domain superfamily
g263	1	967680	970804									1023	0.68	RNA polymerase I-specific transcription-initiation factor	RNA polymerase I-specific transcription initiation factor RRN6-like								RNA polymerase I-specific transcription initiation factor RRN6-like
g264	1	971278	972102									257	0.78	Chromosome segregation protein Spc25	Chromosome segregation protein Spc25		Reactome: R-HSA-141444|Reactome: R-HSA-2467813|Reactome: R-HSA-2500257|Reactome: R-HSA-5663220|Reactome: R-HSA-68877|Reactome: R-HSA-9648025
g265	1	972517	972854									70	2.86	Mitotic-spindle organizing gamma-tubulin ring associated	Mitotic-spindle organizing protein 1	GO:0008274|GO:0033566	Reactome: R-HSA-380270|Reactome: R-HSA-380320						Mitotic-spindle organizing protein 1
g266	1	973264	975178									621	4.67	Ring finger domain, Zinc-ribbon, CHY zinc finger	Zinc finger, RING-type, Zinc finger, CTCHY-type, Zinc finger, RING/FYVE/PHD-type, Zinc finger, CHY-type superfamily, RCHY1, zinc-ribbon, Zinc finger, CHY-type, Zinc finger, CTCHY-type superfamily	GO:0008270	Reactome: R-HSA-110320|Reactome: R-HSA-983168		Zinc finger, CTCHY-type, Zinc finger, RING-type, Zinc finger, CHY-type	Zinc finger, RING-type, Zinc finger, RING-type	Zinc finger, CHY-type superfamily, Zinc finger, CTCHY-type superfamily
g267	1	977457	979884		10		6	5	10			740	1.49	MIR domain, C-terminal four TMM region of protein-O-mannosyltransferase, Dolichyl-phosphate-mannose-protein mannosyltransferase	MIR motif, Mir domain superfamily, Protein O-mannosyl-transferase, C-terminal four TM domain, Glycosyl transferase family 39/83, Glycosyltransferase 39-like	GO:0016020|GO:0000030|GO:0006493|GO:0016020	KEGG: 00514+2.4.1.109|KEGG: 00515+2.4.1.109|MetaCyc: PWY-7921|MetaCyc: PWY-7922|MetaCyc: PWY-7979|Reactome: R-HSA-5083629|Reactome: R-HSA-5083633|Reactome: R-HSA-5173105, Reactome: R-HSA-5083629|Reactome: R-HSA-5083633|Reactome: R-HSA-5173105		MIR motif, MIR motif, MIR motif	MIR motif, MIR motif, MIR motif	Mir domain superfamily		Glycosyltransferase 39-like
g268	1	980352	981116									254	1.97	Ras family, Ras family	Small GTP-binding protein domain, Small GTPase, P-loop containing nucleoside triphosphate hydrolase	GO:0005525|GO:0003924|GO:0005525					P-loop containing nucleoside triphosphate hydrolase	Small GTP-binding protein domain
g269	1	982850	985205		8		4	5	8			766	0.65	Plasma-membrane choline transporter	Choline transporter-like		Reactome: R-HSA-1483191|Reactome: R-HSA-425366						Choline transporter-like
g270	1	985938	986843									301	1.66	Arginase family	Ureohydrolase domain superfamily, Ureohydrolase	GO:0046872			Ureohydrolase		Ureohydrolase domain superfamily
g271	1	987087	988409									440
g272	1	989718	990922	1		1	1			Non-effector	0.624	383	0.26	FMN-dependent dehydrogenase, FMN-dependent dehydrogenase	L-mandelate/L-lactate dehydrogenase, FMN-binding domain, Alpha-hydroxy acid dehydrogenase, FMN-dependent, FMN hydroxy acid dehydrogenase domain, FMN-dependent alpha-hydroxy acid dehydrogenase, active site, Aldolase-type TIM barrel, FMN-dependent dehydrogenase	GO:0010181|GO:0016491|GO:0055114|GO:0016491|GO:0055114|GO:0003824|GO:0016491	Reactome: R-HSA-9033241	L-mandelate/L-lactate dehydrogenase, FMN-binding domain	FMN hydroxy acid dehydrogenase domain
g273	1	995028	1000135									1349	0.67	Glycosyltransferase family 28 N-terminal domain	Ubiquitin interacting motif, Glycosyltransferase family 28, N-terminal domain, Vacuolar protein sorting-associated protein 13	GO:0005975|GO:0016758|GO:0030259	KEGG: 00550+2.4.1.227|MetaCyc: PWY-5265|MetaCyc: PWY-6385|MetaCyc: PWY-6470|MetaCyc: PWY-6471		Ubiquitin interacting motif	Ubiquitin interacting motif, Ubiquitin interacting motif, Ubiquitin interacting motif, Ubiquitin interacting motif, Ubiquitin interacting motif			Vacuolar protein sorting-associated protein 13
g274	1	1000745	1001962									346	2.02
g275	1	1003916	1004489		1		1	1	1			113		Sec61beta family	Protein transport Sec61-beta/Sbh, Protein transport protein SecG/Sec61-beta/Sbh	GO:0005784|GO:0006886	Reactome: R-HSA-1236974|Reactome: R-HSA-1799339|Reactome: R-HSA-9609523						Protein transport Sec61-beta/Sbh
g276	1	1005778	1008874									531	0.94	NLI interacting factor-like phosphatase	FCP1 homology domain, Dullard phosphatase domain, eukaryotic, HAD-like superfamily, HAD superfamily	GO:0016791			FCP1 homology domain	FCP1 homology domain	HAD-like superfamily	Dullard phosphatase domain, eukaryotic
g277	1	1011309	1013959		3		2	2	1			818	0.49	ABC transporter, ABC transporter transmembrane region 2	ABC transporter-like, ABC transporter type 1, transmembrane domain, ABC transporter, conserved site, P-loop containing nucleoside triphosphate hydrolase, AAA+ ATPase domain	GO:0005524|GO:0016887|GO:0005524|GO:0016021|GO:0042626|GO:0055085			ABC transporter type 1, transmembrane domain, ABC transporter-like	AAA+ ATPase domain	P-loop containing nucleoside triphosphate hydrolase
g278	1	1014835	1015916		1		1	1	1			344	2.91
g279	1	1016238	1018763									749	0.67		Protein kinase-like domain superfamily, Protein kinase domain	GO:0004672|GO:0005524|GO:0006468			Protein kinase domain		Protein kinase-like domain superfamily
g280	1	1021097	1022419									324	1.23	Aldo/keto reductase family	Aldo/keto reductase, NADP-dependent oxidoreductase domain superfamily, NADP-dependent oxidoreductase domain, Aldo/keto reductase, conserved site	GO:0016491|GO:0055114		NADP-dependent oxidoreductase domain			NADP-dependent oxidoreductase domain superfamily		Aldo/keto reductase
g281	1	1022853	1024098									378	0.53	Leucine Rich repeats (2 copies), Leucine Rich repeats (2 copies), Leucine Rich repeats (2 copies), Leucine rich repeat	Leucine-rich repeat, Leucine-rich repeat, typical subtype, Leucine-rich repeat domain superfamily, Leucine rich repeat 4	GO:0005515			Leucine-rich repeat, Leucine-rich repeat, Leucine-rich repeat, Leucine-rich repeat, Leucine-rich repeat, Leucine-rich repeat, Leucine-rich repeat, Leucine-rich repeat, Leucine-rich repeat, Leucine-rich repeat	Leucine-rich repeat, typical subtype, Leucine-rich repeat, typical subtype, Leucine-rich repeat, typical subtype, Leucine-rich repeat, typical subtype, Leucine-rich repeat, typical subtype
g282	1	1025065	1026094									271	1.48		Alpha/Beta hydrolase fold						Alpha/Beta hydrolase fold
g283	1	1027529	1028545			1	1					286	1.05	BTB/POZ domain	BTB/POZ domain, SKP1/BTB/POZ domain superfamily	GO:0005515			BTB/POZ domain		SKP1/BTB/POZ domain superfamily
g284	1	1029672	1031479									455	1.32	PCI domain	Proteasome component (PCI) domain, Winged helix-like DNA-binding domain superfamily				Proteasome component (PCI) domain
g285	1	1031640	1032992									228		Ribosomal proteins 50S-L18Ae/60S-L20/60S-L18A	50S ribosomal protein L18Ae/60S ribosomal protein L20 and L18a, Ribosomal protein 50S-L18Ae/60S-L20/60S-L18A	GO:0003735|GO:0005840|GO:0006412	Reactome: R-HSA-156827|Reactome: R-HSA-156902|Reactome: R-HSA-1799339|Reactome: R-HSA-192823|Reactome: R-HSA-2408557|Reactome: R-HSA-6791226|Reactome: R-HSA-72689|Reactome: R-HSA-72706|Reactome: R-HSA-72764|Reactome: R-HSA-9010553|Reactome: R-HSA-9633012|Reactome: R-HSA-975956|Reactome: R-HSA-975957						50S ribosomal protein L18Ae/60S ribosomal protein L20 and L18a
g286	1	1033179	1035299									706	2.12	Fungal Zn(2)-Cys(6) binuclear cluster domain, Fungal specific transcription factor domain	Zn(2)-C6 fungal-type DNA-binding domain superfamily, Zn(2)-C6 fungal-type DNA-binding domain, Transcription factor domain, fungi	GO:0000981|GO:0006355|GO:0008270|GO:0042025|GO:0003677|GO:0005634|GO:0006351|GO:0008270		Zn(2)-C6 fungal-type DNA-binding domain	Zn(2)-C6 fungal-type DNA-binding domain	Transcription factor domain, fungi, Zn(2)-C6 fungal-type DNA-binding domain	Zn(2)-C6 fungal-type DNA-binding domain superfamily
g287	1	1036099	1036782									227	0.88	Acetyltransferase (GNAT) domain	GNAT domain, Acyl-CoA N-acyltransferase	GO:0008080			GNAT domain		Acyl-CoA N-acyltransferase
g288	1	1037057	1037591		3	1	2	2	3			162		Domain of unknown function (DUF1772)
g289	1	1038020	1038776									231	0.87	Chromo (CHRromatin Organisation MOdifier) domain	Chromo domain, conserved site, Chromo/chromo shadow domain, Chromo domain, Chromo-like domain superfamily				Chromo/chromo shadow domain	Chromo/chromo shadow domain	Chromo-like domain superfamily
g290	1	1039507	1041093									469	0.21	Guanine nucleotide exchange factor synembryn	Guanine nucleotide exchange factor, Ric8, Armadillo-type fold						Armadillo-type fold		Guanine nucleotide exchange factor, Ric8
g291	1	1041886	1047254									1773	0.73	Rap1-interacting factor 1 N terminal	Telomere-associated protein Rif1, N-terminal		Reactome: R-HSA-5693571
g292	1	1050727	1052495		10		5	6	10			548	1.09	Sugar (and other) transporter	Major facilitator, sugar transporter-like, Sugar transporter, conserved site, Sugar/inositol transporter, Major facilitator superfamily domain, MFS transporter superfamily	GO:0016021|GO:0022857|GO:0055085|GO:0016020|GO:0022857|GO:0055085|GO:0022857	Reactome: R-HSA-189200		Major facilitator superfamily domain		MFS transporter superfamily	Sugar/inositol transporter
g293	1	1053361	1054409									313	0.32	Aldose 1-epimerase	Galactose mutarotase-like domain superfamily, Glycoside hydrolase-type carbohydrate-binding, Aldose 1-/Glucose-6-phosphate 1-epimerase, Glucose-6-phosphate 1-epimerase	GO:0003824|GO:0005975|GO:0030246|GO:0030246|GO:0005975|GO:0016853	KEGG: 00010+5.1.3.15	Glucose-6-phosphate 1-epimerase			Galactose mutarotase-like domain superfamily
g294	1	1054737	1056152									471	1.06	Class-II DAHP synthetase family	DAHP synthetase, class II	GO:0003849|GO:0009073	KEGG: 00400+2.5.1.54|MetaCyc: PWY-6164						DAHP synthetase, class II
g295	1	1056919	1057391									121	0.83		Huntingtin-interacting protein K, UBA-like domain			Huntingtin-interacting protein K, UBA-like domain
g296	1	1057635	1061121									1145	0.35		BRCT domain, BRCT domain superfamily, Microcephalin-like		Reactome: R-HSA-2299718		BRCT domain		BRCT domain superfamily		Microcephalin-like
g297	1	1062265	1062650									110	5.45
g298	1	1063436	1064329									297	1.01	RNase P subunit p30	RNase P subunit p30, Polymerase/histidinol phosphatase-like	GO:0004526|GO:0008033|GO:0003824	Reactome: R-HSA-6784531|Reactome: R-HSA-6791226				Polymerase/histidinol phosphatase-like		RNase P subunit p30
g299	1	1064557	1065955	1		1	1			Non-effector	0.97	376
g300	1	1067956	1068647									174	5.75	Glutathione-dependent formaldehyde-activating enzyme	Glutathione-dependent formaldehyde-activating enzyme/centromere protein V, Mss4-like superfamily	GO:0016846	KEGG: 00680+4.4.1.22|MetaCyc: PWY-1801				Mss4-like superfamily
g301	1	1071468	1072304									259		Mediator of RNA polymerase II transcription complex subunit 8	Mediator complex, subunit Med8, fungi/metazoa	GO:0003712|GO:0006357|GO:0016592	Reactome: R-HSA-1989781|Reactome: R-HSA-212436|Reactome: R-HSA-381340						Mediator complex, subunit Med8, fungi/metazoa
g302	1	1073290	1075052									552	1.27	Choline sulfatase enzyme C terminal, Sulfatase	Choline-sulfatase, Sulfatase, conserved site, Choline sulfatase enzyme C-terminal domain, Sulfatase, N-terminal, Alkaline-phosphatase-like, core domain superfamily	GO:0008484|GO:0003824		Choline-sulfatase			Alkaline-phosphatase-like, core domain superfamily	Choline-sulfatase
g303	1	1080025	1085370									1764	0.62	IQ calmodulin-binding motif, RasGAP C-terminus, Calponin homology (CH) domain, GTPase-activator protein for Ras-like GTPase	IQ motif, EF-hand binding site, Rho GTPase activation protein, Calponin homology domain, CH domain superfamily, Ras GTPase-activating domain, RasGAP protein, C-terminal	GO:0005515|GO:0007165|GO:0043087	Reactome: R-HSA-5626467	Calponin homology domain	IQ motif, EF-hand binding site, IQ motif, EF-hand binding site, IQ motif, EF-hand binding site, Calponin homology domain, IQ motif, EF-hand binding site, IQ motif, EF-hand binding site, IQ motif, EF-hand binding site, IQ motif, EF-hand binding site, IQ motif, EF-hand binding site, IQ motif, EF-hand binding site, IQ motif, EF-hand binding site, Ras GTPase-activating domain, IQ motif, EF-hand bindi…	IQ motif, EF-hand binding site, IQ motif, EF-hand binding site, IQ motif, EF-hand binding site, IQ motif, EF-hand binding site, IQ motif, EF-hand binding site, IQ motif, EF-hand binding site, IQ motif, EF-hand binding site, IQ motif, EF-hand binding site, Calponin homology domain, Ras GTPase-activating domain	Rho GTPase activation protein, CH domain superfamily
g304	1	1086996	1088997		1		1	1	1			633	0.63	Uncharacterised ACR, YagE family COG1723	Domain of unknown function DUF155
g305	1	1089646	1090871		10		5	6	8			369	1.08	Triose-phosphate Transporter family	Sugar phosphate transporter domain
g306	1	1093638	1097285		8		4	5	8			1166	1.37	Heavy-metal-associated domain, Heavy-metal-associated domain, Heavy-metal-associated domain, Heavy-metal-associated domain, E1-E2 ATPase, haloacid dehalogenase-like hydrolase	P-type ATPase, transmembrane domain superfamily, Heavy metal-associated domain, HMA, P-type ATPase, cytoplasmic domain N, HAD superfamily, P-type ATPase, phosphorylation site, Heavy metal-associated domain superfamily, HAD-like superfamily, P-type ATPase, subfamily IB, Heavy metal-associated domain, copper ion-binding, P-type ATPase, A domain superfamily, P-type ATPase	GO:0030001|GO:0046872|GO:0000166|GO:0006812|GO:0016021|GO:0019829|GO:0005507|GO:0016021	Reactome: R-HSA-936837	Heavy metal-associated domain, HMA, Heavy metal-associated domain, HMA, Heavy metal-associated domain, HMA, Heavy metal-associated domain, HMA	Heavy metal-associated domain, HMA, Heavy metal-associated domain, HMA, Heavy metal-associated domain, HMA, Heavy metal-associated domain, HMA		P-type ATPase, transmembrane domain superfamily, Heavy metal-associated domain superfamily, Heavy metal-associated domain superfamily, HAD-like superfamily, Heavy metal-associated domain superfamily, Heavy metal-associated domain superfamily, P-type ATPase, A domain superfamily, P-type ATPase, cytoplasmic domain N	P-type ATPase, subfamily IB, Heavy metal-associated domain, copper ion-binding, Heavy metal-associated domain, copper ion-binding, Heavy metal-associated domain, copper ion-binding, P-type ATPase, P-type ATPase
g307	1	1099663	1100543									276	0.36	PCI domain	Proteasome component (PCI) domain				Proteasome component (PCI) domain	Proteasome component (PCI) domain
g308	1	1101029	1102219		3		2	2	3			363	0.83	Regulator of G protein signaling domain	RGS domain, RGS domain superfamily				RGS domain	RGS domain	RGS domain superfamily
g309	1	1102539	1103459									131		Ribosomal protein L31e	Ribosomal protein L31e domain superfamily, Ribosomal protein L31e, Ribosomal protein L31e, conserved site	GO:0003735|GO:0005840|GO:0006412	Reactome: R-HSA-156827|Reactome: R-HSA-156902|Reactome: R-HSA-1799339|Reactome: R-HSA-192823|Reactome: R-HSA-2408557|Reactome: R-HSA-6791226|Reactome: R-HSA-72689|Reactome: R-HSA-72706|Reactome: R-HSA-72764|Reactome: R-HSA-9010553|Reactome: R-HSA-9633012|Reactome: R-HSA-975956|Reactome: R-HSA-975957	Ribosomal protein L31e		Ribosomal protein L31e	Ribosomal protein L31e domain superfamily		Ribosomal protein L31e
g310	1	1103892	1104539									180	0.56	Ubiquitin-conjugating enzyme	Ubiquitin-conjugating enzyme E2, Ubiquitin-conjugating enzyme/RWD-like, Ubiquitin-conjugating enzyme, active site		Reactome: R-HSA-983168, MetaCyc: PWY-7511|Reactome: R-HSA-983168	Ubiquitin-conjugating enzyme E2	Ubiquitin-conjugating enzyme E2		Ubiquitin-conjugating enzyme/RWD-like
g311	1	1105425	1107084									532	0.94	Protein kinase domain	Protein kinase-like domain superfamily, Protein kinase domain, Serine/threonine-protein kinase, active site, Protein kinase, ATP binding site	GO:0004672|GO:0005524|GO:0006468|GO:0004672|GO:0006468|GO:0005524			Protein kinase domain	Protein kinase domain	Protein kinase-like domain superfamily
g312	1	1109822	1111561									545	2.57
g313	1	1113644	1114713									338	1.48	Rhodanese-like domain	Rhodanese-like domain superfamily, Rhodanese-like domain				Rhodanese-like domain, Rhodanese-like domain	Rhodanese-like domain, Rhodanese-like domain	Rhodanese-like domain superfamily, Rhodanese-like domain superfamily
g314	1	1115352	1116335									257	0.78	Ribosomal protein S5, N-terminal domain, Ribosomal protein S5, C-terminal domain	Ribosomal protein S5, N-terminal, Ribosomal protein S5, Ribosomal protein S5 domain 2-type fold, subgroup, Ribosomal protein S5, C-terminal, Ribosomal protein S5, N-terminal, conserved site, Ribosomal protein S5 domain 2-type fold, Ribosomal protein S5, eukaryotic/archaeal	GO:0003723|GO:0003735|GO:0005840|GO:0006412|GO:0003735|GO:0005840|GO:0006412|GO:0003735|GO:0006412|GO:0015935	Reactome: R-HSA-156827|Reactome: R-HSA-156902|Reactome: R-HSA-1799339|Reactome: R-HSA-192823|Reactome: R-HSA-2408557|Reactome: R-HSA-3214858|Reactome: R-HSA-6790901|Reactome: R-HSA-6791226|Reactome: R-HSA-72649|Reactome: R-HSA-72689|Reactome: R-HSA-72695|Reactome: R-HSA-72702|Reactome: R-HSA-72706|Reactome: R-HSA-72764|Reactome: R-HSA-8876725|Reactome: R-HSA-9010553|Reactome: R-HSA-9633012|Reacto…		Ribosomal protein S5, N-terminal		Ribosomal protein S5 domain 2-type fold	Ribosomal protein S5, eukaryotic/archaeal	Ribosomal protein S5
g315	1	1116721	1121222									1416	0.71
g316	1	1121868	1123820									633	1.26
g317	1	1125730	1127094									403	1.24	Arrestin (or S-antigen), C-terminal domain	Arrestin C-terminal-like domain					Arrestin C-terminal-like domain
g318	1	1128214	1129575									453	0.44	tRNA-splicing endonuclease subunit sen54 N-term	tRNA-splicing endonuclease, subunit Sen54, N-terminal, tRNA-splicing endonuclease, subunit Sen54		Reactome: R-HSA-6784531						tRNA-splicing endonuclease, subunit Sen54
g319	1	1133846	1137274									777	0.26
g320	1	1142514	1143700									342	0.58	NAD dependent epimerase/dehydratase family	NAD(P)-binding domain superfamily, NAD-dependent epimerase/dehydratase	GO:0003824					NAD(P)-binding domain superfamily
g321	1	1144591	1147224		1		1	1	1			824	0.36	ATPase family associated with various cellular activities (AAA), Peptidase family M41, AAA+ lid domain	ATPase, AAA-type, conserved site, P-loop containing nucleoside triphosphate hydrolase, ATPase, AAA-type, core, Peptidase M41-like, Peptidase M41, AAA ATPase, AAA+ lid domain, AAA+ ATPase domain, Peptidase, FtsH	GO:0005524|GO:0004222|GO:0005524|GO:0006508|GO:0004222|GO:0016020	Reactome: R-HSA-8949664			AAA+ ATPase domain	P-loop containing nucleoside triphosphate hydrolase, Peptidase M41-like	Peptidase, FtsH
g322	1	1148714	1150126									419	2.39	Zinc finger, C2H2 type, Zinc finger, C2H2 type, Zinc finger, C2H2 type, Zinc finger, C2H2 type	Zinc finger C2H2 superfamily, Zinc finger C2H2-type				Zinc finger C2H2-type, Zinc finger C2H2-type, Zinc finger C2H2-type, Zinc finger C2H2-type	Zinc finger C2H2-type, Zinc finger C2H2-type, Zinc finger C2H2-type, Zinc finger C2H2-type	Zinc finger C2H2 superfamily, Zinc finger C2H2 superfamily
g323	1	1163530	1170791									1868	1.23	Glycerophosphoryl diester phosphodiesterase family, Ankyrin repeats (3 copies)	Ankyrin repeat, Ankyrin repeat-containing domain, Ankyrin repeat-containing domain superfamily, Glycerophosphodiester phosphodiesterase Gde1, Glycerophosphodiester phosphodiesterase domain, PLC-like phosphodiesterase, TIM beta/alpha-barrel domain superfamily, SPX domain	GO:0005515|GO:0046475|GO:0047389|GO:0006629|GO:0008081	Reactome: R-HSA-1483115|Reactome: R-HSA-1483152		Ankyrin repeat, Ankyrin repeat, Ankyrin repeat-containing domain, Ankyrin repeat, Glycerophosphodiester phosphodiesterase domain, SPX domain	Ankyrin repeat, Ankyrin repeat, Ankyrin repeat, Ankyrin repeat, Ankyrin repeat, Ankyrin repeat, Ankyrin repeat	PLC-like phosphodiesterase, TIM beta/alpha-barrel domain superfamily, Ankyrin repeat-containing domain superfamily		Glycerophosphodiester phosphodiesterase Gde1, Glycerophosphodiester phosphodiesterase Gde1
g324	1	1171132	1171831									160	3.12	Eukaryotic protein of unknown function (DUF866)	CXXC motif containing zinc binding protein, eukaryotic								CXXC motif containing zinc binding protein, eukaryotic
g325	1	1173048	1174557									483	2.28	ZPR1 zinc-finger domain, ZPR1 zinc-finger domain	ZPR1, zinc finger domain, ZPR1 family, ZPR1, A/B domain, Zinc finger, ZPR1-type	GO:0008270				Zinc finger, ZPR1-type, Zinc finger, ZPR1-type		Zinc finger, ZPR1-type, Zinc finger, ZPR1-type	ZPR1 family
g326	1	1174977	1175592		4		2	3	3			170	4.12	Amino acid permease	Amino acid permease/ SLC12A domain	GO:0016020|GO:0055085
g327	1	1178568	1179720									334	1.5
g328	1	1180051	1181065									302	0.66	Enoyl-(Acyl carrier protein) reductase	Short-chain dehydrogenase/reductase SDR, Short-chain dehydrogenase/reductase, conserved site, NAD(P)-binding domain superfamily	GO:0016491					NAD(P)-binding domain superfamily
g329	1	1182735	1184222	1		1	1			Non-effector	0.763	495
g330	1	1184336	1185530									382	0.79	Origin recognition complex subunit 6 (ORC6)	Origin recognition complex, subunit 6	GO:0003677|GO:0005664|GO:0006260	Reactome: R-HSA-113507|Reactome: R-HSA-176187|Reactome: R-HSA-68616|Reactome: R-HSA-68689|Reactome: R-HSA-68827|Reactome: R-HSA-68867|Reactome: R-HSA-68949|Reactome: R-HSA-68962
g331	1	1186181	1186844	1		1	1			Non-effector	0.879	200			EF-hand domain pair, Nucleobindin, EF-hand domain	GO:0005509			EF-hand domain		EF-hand domain pair		Nucleobindin
g332	1	1187009	1188145									378	1.32	Met-10+ like-protein	S-adenosyl-L-methionine-dependent methyltransferase, SAM-dependent methyltransferase TRM5/TYW2-type, tRNA wybutosine synthesizing protein 2	GO:0008757|GO:0031591	Reactome: R-HSA-6782861, MetaCyc: PWY-7286		SAM-dependent methyltransferase TRM5/TYW2-type		S-adenosyl-L-methionine-dependent methyltransferase
g333	1	1188474	1189832									401	2.99	Calcineurin-like phosphoesterase	Serine/threonine-specific protein phosphatase/bis(5-nucleosyl)-tetraphosphatase, Calcineurin-like phosphoesterase domain, ApaH type	GO:0016787	KEGG: 04658+3.1.3.16|KEGG: 04660+3.1.3.16|KEGG: 05235+3.1.3.16			Serine/threonine-specific protein phosphatase/bis(5-nucleosyl)-tetraphosphatase
g334	1	1190735	1192520									577		RNA recognition motif. (a.k.a. RRM, RBD, or RNP domain), Smg-4/UPF3 family	RNA recognition motif domain, RNA-binding domain superfamily, UPF3 domain, Nucleotide-binding alpha-beta plait domain superfamily, Nonsense-mediated mRNA decay protein 3	GO:0003676|GO:0000184	Reactome: R-HSA-9010553|Reactome: R-HSA-975957		RNA recognition motif domain	RNA recognition motif domain	RNA-binding domain superfamily, RNA-binding domain superfamily		Nonsense-mediated mRNA decay protein 3
g335	1	1193578	1194408		1		1	1	1			276	1.45		FMN-binding split barrel
g336	1	1194907	1196238									421	0.48
g337	1	1201446	1202111									221	2.71
g338	1	1205928	1208923									920	0.33	Telomere repeat binding factor (TRF)	Homeobox-like domain superfamily, Myb domain, SANT/Myb domain, Telomere repeat-binding factor, dimerisation domain	GO:0003677|GO:0042162|GO:0042803	Reactome: R-HSA-110328|Reactome: R-HSA-110329|Reactome: R-HSA-110330|Reactome: R-HSA-110331|Reactome: R-HSA-1221632|Reactome: R-HSA-171306|Reactome: R-HSA-2559586		Myb domain	SANT/Myb domain	Homeobox-like domain superfamily
g339	1	1212632	1213140	1	1	1	1	1	2			151	0.66
g340	1	1215715	1217520									601	0.83		Protein kinase-like domain superfamily, Protein kinase domain	GO:0004672|GO:0005524|GO:0006468			Protein kinase domain		Protein kinase-like domain superfamily
g341	1	1219866	1220978		2		2	1				353	1.13	short chain dehydrogenase	Short-chain dehydrogenase/reductase SDR, NAD(P)-binding domain superfamily						NAD(P)-binding domain superfamily
g342	1	1221513	1222547									344	0.58	Neugrin	Neugrin/Rrg9								Neugrin/Rrg9
g343	1	1224333	1225912		2		2	1	2			484	0.41	Uncharacterized protein conserved in bacteria (DUF2236)	Domain of unknown function DUF2236, Rubber oxygenase Lcp-like								Rubber oxygenase Lcp-like
g344	1	1226285	1227046									253	0.4	Calcipressin	RNA-binding domain superfamily, Calcipressin, Nucleotide-binding alpha-beta plait domain superfamily	GO:0003676|GO:0019722					RNA-binding domain superfamily		Calcipressin
g345	1	1229949	1231467									484	0.83	tRNA synthetases class II core domain (F), tRNA synthetases class II core domain (F), Ferredoxin-fold anticodon binding domain	Ferrodoxin-fold anticodon-binding domain superfamily, Ferrodoxin-fold anticodon-binding domain, Phenylalanyl-tRNA synthetase, Phenylalanyl-tRNA synthetase, class IIc, mitochondrial, Aminoacyl-tRNA synthetase, class II	GO:0000049|GO:0004812|GO:0005524|GO:0043039|GO:0000166|GO:0004826|GO:0005524|GO:0005737|GO:0006432	KEGG: 00970+6.1.1.20, KEGG: 00970+6.1.1.20|Reactome: R-HSA-379726		Ferrodoxin-fold anticodon-binding domain, Aminoacyl-tRNA synthetase, class II	Ferrodoxin-fold anticodon-binding domain	Ferrodoxin-fold anticodon-binding domain superfamily	Phenylalanyl-tRNA synthetase, class IIc, mitochondrial	Phenylalanyl-tRNA synthetase, class IIc, mitochondrial
g346	1	1232095	1233203		1		1	1	1			318	0.63	Mitochondrial carrier protein, Mitochondrial carrier protein, Mitochondrial carrier protein	Mitochondrial substrate/solute carrier, Mitochondrial carrier domain superfamily, Mitochondrial carrier protein	GO:0005347|GO:0055085			Mitochondrial substrate/solute carrier, Mitochondrial substrate/solute carrier, Mitochondrial substrate/solute carrier		Mitochondrial carrier domain superfamily
g347	1	1233598	1234738									340	2.06	RNA polymerase Rpb3/Rpb11 dimerisation domain, RNA polymerase Rpb3/RpoA insert domain	RNA polymerase, RBP11-like subunit, DNA-directed RNA polymerase, RpoA/D/Rpb3-type, DNA-directed RNA polymerase, insert domain superfamily, DNA-directed RNA polymerase, insert domain, DNA-directed RNA polymerase, 30-40kDa subunit, conserved site	GO:0006351|GO:0046983|GO:0003899|GO:0006351|GO:0003899|GO:0006351|GO:0046983|GO:0003677|GO:0003899|GO:0006351				DNA-directed RNA polymerase, RpoA/D/Rpb3-type	RNA polymerase, RBP11-like subunit, DNA-directed RNA polymerase, insert domain superfamily
g348	1	1235126	1236463									445	0.45	WD domain, G-beta repeat, WD domain, G-beta repeat, WD domain, G-beta repeat, WD domain, G-beta repeat, Sof1-like domain	WD40/YVTN repeat-like-containing domain superfamily, WD40 repeat, WD40-repeat-containing domain superfamily, G-protein beta WD-40 repeat, WD40-repeat-containing domain, Sof1-like protein	GO:0005515	Reactome: R-HSA-6790901|Reactome: R-HSA-6791226|Reactome: R-HSA-8951664		WD40-repeat-containing domain, WD40 repeat, WD40 repeat, WD40 repeat	WD40 repeat, WD40 repeat, WD40 repeat, WD40 repeat, WD40 repeat, WD40 repeat	WD40-repeat-containing domain superfamily
g349	1	1237322	1239950									704	0.71	Histidine phosphatase superfamily (branch 1), 6-phosphofructo-2-kinase, 6-phosphofructo-2-kinase	Histidine phosphatase superfamily, clade-1, Histidine phosphatase superfamily, Phosphoglycerate/bisphosphoglycerate mutase, active site, Fructose-2,6-bisphosphatase, 6-phosphofructo-2-kinase, P-loop containing nucleoside triphosphate hydrolase	GO:0003824|GO:0003824|GO:0005524|GO:0006003|GO:0003873|GO:0005524|GO:0006000	KEGG: 00051+2.7.1.105+3.1.3.46|Reactome: R-HSA-9634600	Histidine phosphatase superfamily, clade-1		Histidine phosphatase superfamily, clade-1	Histidine phosphatase superfamily, P-loop containing nucleoside triphosphate hydrolase		Fructose-2,6-bisphosphatase
g350	1	1246075	1247455									435	1.84	Cytidine and deoxycytidylate deaminase zinc-binding region	Cytidine deaminase-like, Cytidine and deoxycytidylate deaminase domain	GO:0003824			Cytidine and deoxycytidylate deaminase domain		Cytidine deaminase-like
g351	1	1248454	1249555									343	0.87	RNase H, Caulimovirus viroplasmin, Caulimovirus viroplasmin	Ribonuclease H superfamily, Ribonuclease H domain, Ribonuclease H1, N-terminal domain superfamily, Ribosomal protein L9/RNase H1, N-terminal, Ribonuclease H-like superfamily, Ribonuclease H1, eukaryote, Ribonuclease H1, N-terminal	GO:0003676|GO:0003676|GO:0004523|GO:0000287|GO:0004523			Ribonuclease H domain		Ribosomal protein L9/RNase H1, N-terminal, Ribonuclease H-like superfamily, Ribosomal protein L9/RNase H1, N-terminal
g352	1	1250692	1252355	1		1	1			Non-effector	0.963	536	1.49	Serine carboxypeptidase S28, Serine carboxypeptidase S28	Peptidase S28, Alpha/Beta hydrolase fold	GO:0006508|GO:0008236
g353	1	1257091	1261362		1		1	1	1			1386	0.79	IPT/TIG domain, Ankyrin repeats (many copies)	Ankyrin repeat, Ankyrin repeat-containing domain superfamily, IPT domain, Ankyrin repeat-containing domain, Immunoglobulin-like fold, Immunoglobulin E-set	GO:0005515			Ankyrin repeat, Ankyrin repeat, Ankyrin repeat-containing domain	Ankyrin repeat, Ankyrin repeat, IPT domain	Ankyrin repeat-containing domain superfamily, Immunoglobulin E-set
g354	1	1262546	1263976									476
g355	1	1265389	1267081									532	0.56	Velvet factor, Velvet factor	Velvet domain, Velvet factor, Velvet domain superfamily				Velvet domain				Velvet factor
g356	1	1273895	1274881		7		4	4	7			293	0.34	Bacteriorhodopsin-like protein	Archaeal/bacterial/fungal rhodopsins, Yro2-like, 7TM domain	GO:0005216|GO:0006811|GO:0016020		Yro2-like, 7TM domain		Archaeal/bacterial/fungal rhodopsins			Archaeal/bacterial/fungal rhodopsins
g357	1	1276264	1279403									1009	0.89		Armadillo-type fold, Armadillo-like helical, Armadillo-type fold containing protein ARMC8/Vid28		Reactome: R-HSA-6798695				Armadillo-type fold, Armadillo-type fold		Armadillo-type fold containing protein ARMC8/Vid28
g358	1	1282267	1283367			1	1					348	0.57	Cyclin	Cyclin PHO80-like, Cyclin-like superfamily	GO:0000079|GO:0019901					Cyclin-like superfamily
g359	1	1283897	1284520	1	1	1	1	1		Effector	0.585	190	0.53
g360	1	1286558	1287025									116		Histone chaperone domain CHZ	Histone chaperone domain CHZ					Histone chaperone domain CHZ
g361	1	1287756	1288428		1		1	1	1			174			BET1, SNARE domain, Target SNARE coiled-coil homology domain, BET1-like protein	GO:0015031|GO:0030173	Reactome: R-HSA-6807878	BET1, SNARE domain	Target SNARE coiled-coil homology domain	Target SNARE coiled-coil homology domain			BET1-like protein
g362	1	1288821	1289944									358		Apc15p protein	Anaphase-promoting complex subunit 15/mnd2	GO:0005680|GO:0030071|GO:0031145
g363	1	1296171	1302616									2113	1.8	Glutamate synthase central domain, Pyridine nucleotide-disulphide oxidoreductase, GXGXG motif, Glutamine amidotransferases class-II, Dihydroprymidine dehydrogenase domain II, 4Fe-4S cluster, Conserved region in glutamate synthase	Glutamate synthase, NADH/NADPH, small subunit 1, Glutamate synthase, alpha subunit, C-terminal, Glutamate synthase, alpha subunit, C-terminal domain superfamily, Glutamate synthase, central-N, FAD/NAD(P)-binding domain, Glutamate synthase domain, Glutamate synthase, eukaryotic, FAD/NAD(P)-binding domain superfamily, Glutamine amidotransferase type 2 domain, Aldolase-type TIM barrel, Nucleophile a…	GO:0006537|GO:0016639|GO:0055114|GO:0016491|GO:0055114|GO:0006807|GO:0015930|GO:0055114|GO:0006537|GO:0015930|GO:0016638|GO:0055114|GO:0005506|GO:0006537|GO:0010181|GO:0016040|GO:0050660|GO:0003824|GO:0051536	KEGG: 00250+1.4.1.14|KEGG: 00910+1.4.1.14|MetaCyc: PWY-6963, Reactome: R-HSA-73621	Glutamate synthase, alpha subunit, C-terminal, Glutamate synthase domain	Glutamine amidotransferase type 2 domain		Glutamate synthase, alpha subunit, C-terminal domain superfamily, Nucleophile aminohydrolases, N-terminal, Alpha-helical ferredoxin	Glutamate synthase, NADH/NADPH, small subunit 1
g364	1	1304286	1306702		3		2	2	2			769	0.39	VTC domain, Domain of unknown function (DUF202)	VTC domain, Domain of unknown function DUF202, SPX domain				SPX domain
g365	1	1307810	1310637									818	0.73
g366	1	1312863	1314953									599	2	FGGY family of carbohydrate kinases, N-terminal domain, FGGY family of carbohydrate kinases, C-terminal domain	FGGY carbohydrate kinase, pentulose kinase, ATPase, nucleotide binding domain, Carbohydrate kinase, FGGY, N-terminal, Carbohydrate kinase, FGGY, C-terminal	GO:0005975|GO:0016773		FGGY carbohydrate kinase, pentulose kinase			ATPase, nucleotide binding domain, ATPase, nucleotide binding domain	FGGY carbohydrate kinase, pentulose kinase
g367	1	1315485	1319020									1161	0.69	Nucleoporin FG repeat region, Nucleoporin FG repeat region, Nup93/Nic96	Nucleoporin interacting component Nup93/Nic96, Nucleoporin FG repeat	GO:0005643|GO:0017056	Reactome: R-HSA-1169408|Reactome: R-HSA-159227|Reactome: R-HSA-159230|Reactome: R-HSA-159231|Reactome: R-HSA-159236|Reactome: R-HSA-165054|Reactome: R-HSA-168271|Reactome: R-HSA-168276|Reactome: R-HSA-168325|Reactome: R-HSA-168333|Reactome: R-HSA-170822|Reactome: R-HSA-180746|Reactome: R-HSA-180910|Reactome: R-HSA-191859|Reactome: R-HSA-3108214|Reactome: R-HSA-3232142|Reactome: R-HSA-3301854|Reac…						Nucleoporin interacting component Nup93/Nic96
g368	1	1320363	1322403									594	0.51	Domain of unknown function (DUF3425)	Protein of unknown function DUF3425
g369	1	1322936	1323748									270	3.33
g370	1	1324005	1325171									370	5.14	Zinc finger, C2H2 type, Zinc finger, C2H2 type, Zinc finger, C2H2 type, Zinc-finger double-stranded RNA-binding	Zinc finger C2H2 superfamily, Zinc finger C2H2-type, Zinc finger, double-stranded RNA binding				Zinc finger C2H2-type, Zinc finger C2H2-type, Zinc finger C2H2-type, Zinc finger C2H2-type, Zinc finger C2H2-type	Zinc finger C2H2-type, Zinc finger C2H2-type, Zinc finger C2H2-type, Zinc finger C2H2-type, Zinc finger C2H2-type, Zinc finger C2H2-type, Zinc finger C2H2-type, Zinc finger C2H2-type, Zinc finger C2H2-type	Zinc finger C2H2 superfamily, Zinc finger C2H2 superfamily, Zinc finger C2H2 superfamily
g371	1	1326812	1328042									371	1.35
g372	1	1331687	1335115		9		5	5	9			923	1.3	E1-E2 ATPase, haloacid dehalogenase-like hydrolase, Cation transporter/ATPase, N-terminus	P-type ATPase, P-type ATPase, transmembrane domain superfamily, HAD-like superfamily, P-type ATPase, subfamily IIIA, HAD superfamily, P-type ATPase, A domain superfamily, Cation-transporting P-type ATPase, N-terminal, P-type ATPase, phosphorylation site, P-type ATPase, cytoplasmic domain N	GO:0016021|GO:0008553|GO:0016021|GO:0120029|GO:0000166	Reactome: R-HSA-936837, KEGG: 00190+7.1.2.1	P-type ATPase, subfamily IIIA		Cation-transporting P-type ATPase, N-terminal	P-type ATPase, transmembrane domain superfamily, HAD-like superfamily, P-type ATPase, A domain superfamily	P-type ATPase, P-type ATPase, P-type ATPase, subfamily IIIA
g373	1	1348804	1351311									687	0.58	RNA recognition motif. (a.k.a. RRM, RBD, or RNP domain), RNA polymerase II-binding domain.	ENTH/VHS, RNA recognition motif domain, CID domain, RNA-binding domain superfamily, RNA polymerase II-binding domain, Nucleotide-binding alpha-beta plait domain superfamily	GO:0003676			RNA recognition motif domain, CID domain	CID domain, RNA recognition motif domain	ENTH/VHS, RNA-binding domain superfamily
g374	1	1355040	1356777									470	0.64	Citrate synthase, C-terminal domain	Citrate synthase, Citrate synthase, eukaryotic-type, Citrate synthase-like, large alpha subdomain, Citrate synthase-like, small alpha subdomain, Citrate synthase superfamily, Citrate synthase active site	GO:0046912|GO:0004108|GO:0006101|GO:0006099|GO:0046912	Reactome: R-HSA-1268020|Reactome: R-HSA-71403				Citrate synthase superfamily	Citrate synthase, eukaryotic-type	Citrate synthase
g375	1	1358704	1359774									318	0.94	Mitochondrial carrier protein, Mitochondrial carrier protein, Mitochondrial carrier protein	Mitochondrial substrate/solute carrier, Mitochondrial carrier domain superfamily				Mitochondrial substrate/solute carrier, Mitochondrial substrate/solute carrier, Mitochondrial substrate/solute carrier		Mitochondrial carrier domain superfamily
g376	1	1360457	1366639									1726	1.27	WD domain, G-beta repeat, AMP-binding enzyme	AMP-dependent synthetase-like superfamily, AMP-binding, conserved site, WD40-repeat-containing domain superfamily, WD40 repeat, AMP-dependent synthetase/ligase, WD40 repeat, conserved site, WD40/YVTN repeat-like-containing domain superfamily, WD40-repeat-containing domain	GO:0005515|GO:0003824			WD40 repeat, WD40-repeat-containing domain	WD40 repeat, WD40 repeat, WD40 repeat, WD40 repeat	WD40-repeat-containing domain superfamily
g377	1	1369352	1369881		2	1	2	1	3			157	1.91	Membrane-associating domain	Marvel domain	GO:0016020
g378	1	1371156	1372858									454		Cys/Met metabolism PLP-dependent enzyme	Pyridoxal phosphate-dependent transferase, Cys/Met metabolism, pyridoxal phosphate-dependent enzyme, Pyridoxal phosphate-dependent transferase, major domain, O-acetylhomoserine/O-acetylserine sulfhydrylase, Pyridoxal phosphate-dependent transferase domain 1	GO:0019346|GO:0030170|GO:0003824|GO:0006520|GO:0016765	Reactome: R-HSA-1614558|Reactome: R-HSA-1614603|Reactome: R-HSA-2408508	Cys/Met metabolism, pyridoxal phosphate-dependent enzyme			Pyridoxal phosphate-dependent transferase	O-acetylhomoserine/O-acetylserine sulfhydrylase
g379	1	1373091	1374660									276	0.72
g380	1	1375410	1378891		10		6	5	10			863	1.27	Bacterial low temperature requirement A protein (LtrA)	Low temperature requirement A								Low temperature requirement A
g381	1	1379896	1380978									323		WW domain	WW domain, WW domain superfamily	GO:0005515		WW domain	WW domain	WW domain	WW domain superfamily
g382	1	1381331	1382161	1	1	1	1	1	1			242	0.41	Protein of unknown function (DUF2012)	Domain of unknown function DUF2012, ER membrane protein complex subunit 7								ER membrane protein complex subunit 7
g383	1	1382744	1385113									772	0.13
g384	1	1386945	1388972									631	1.11
g385	1	1394750	1397164		6		4	3	6			804	1.24		Glycosyl transferase CAP10 domain					Glycosyl transferase CAP10 domain
g386	1	1398279	1399568		4		2	3	4			429	1.86	DHHC palmitoyltransferase	Palmitoyltransferase PFA4, Palmitoyltransferase, DHHC domain	GO:0005789|GO:0019706|GO:0016409
g387	1	1399985	1403788									1228	0.65	Unconventional myosin tail, actin- and lipid-binding, Myosin head (motor domain), SH3 domain	Class I myosin tail homology domain, Kinesin motor domain superfamily, SH3 domain, Myosin head, motor domain, SH3-like domain superfamily, Fungal myosin-I, SH3 domain, Class I myosin, motor domain, P-loop containing nucleoside triphosphate hydrolase	GO:0003774|GO:0016459|GO:0005515|GO:0003774|GO:0005524|GO:0016459		Fungal myosin-I, SH3 domain, Class I myosin, motor domain	SH3 domain, Myosin head, motor domain, Class I myosin tail homology domain	SH3 domain, Myosin head, motor domain	SH3-like domain superfamily, P-loop containing nucleoside triphosphate hydrolase
g388	1	1405379	1405844									119		RPEL repeat, RPEL repeat	RPEL repeat, Myocardin-like				RPEL repeat, RPEL repeat	RPEL repeat, RPEL repeat			Myocardin-like
g389	1	1406920	1407258									89
g390	1	1409821	1410642	1		1	1			Non-effector	0.862	195	1.03	FKBP-type peptidyl-prolyl cis-trans isomerase	FKBP-type peptidyl-prolyl cis-trans isomerase domain	GO:0003755			FKBP-type peptidyl-prolyl cis-trans isomerase domain
g391	1	1413216	1415569		10		5	6	7			767	1.04	Cation transport protein	Cation transporter, Potassium transporter Trk, fungi	GO:0006812|GO:0008324|GO:0055085|GO:0005887|GO:0015079|GO:0030007|GO:0071805
g392	1	1415733	1417711									641	2.34	impB/mucB/samB family, impB/mucB/samB family C-terminal domain	DNA polymerase IV, Zinc finger, Rad18-type putative, Reverse transcriptase/Diguanylate cyclase domain, UmuC domain, DNA polymerase, Y-family, little finger domain, DNA polymerase, Y-family, little finger domain superfamily, DNA/RNA polymerase superfamily	GO:0003887|GO:0003677|GO:0006281|GO:0006281|GO:0003684|GO:0006281	Reactome: R-HSA-5655862|Reactome: R-HSA-5656169|Reactome: R-HSA-5685942|Reactome: R-HSA-5696397|Reactome: R-HSA-5696400|Reactome: R-HSA-6782135|Reactome: R-HSA-6782210, Reactome: R-HSA-5656169	DNA polymerase IV	UmuC domain	Zinc finger, Rad18-type putative	DNA/RNA polymerase superfamily, DNA polymerase, Y-family, little finger domain superfamily
g393	1	1418271	1419669									422	0.47
g394	1	1421715	1423152		1		1	1	1			455	0.22
g395	1	1424702	1425530									204		NADPH-dependent FMN reductase	Flavoprotein-like superfamily, NADPH-dependent FMN reductase-like, Flavodoxin/nitric oxide synthase, Flavoprotein WrbA-like	GO:0016491|GO:0010181|GO:0003955|GO:0010181	KEGG: 00130+1.6.5.2|MetaCyc: PWY-7731|MetaCyc: PWY-7999		Flavodoxin/nitric oxide synthase		Flavoprotein-like superfamily	Flavoprotein WrbA-like
g396	1	1426296	1427289		7		4	4	6			311	1.29
g397	1	1431678	1432893									351	2.28	SET domain	SET domain	GO:0005515			SET domain	SET domain
g398	1	1433619	1435130									503	0.99
g399	1	1435364	1436953									529	0.95	WD domain, G-beta repeat, WD domain, G-beta repeat, Anaphase-promoting complex subunit 4 WD40 domain	WD40 repeat, WD40-repeat-containing domain, Anaphase-promoting complex subunit 4, WD40 domain, Pre-mRNA-processing factor 17, G-protein beta WD-40 repeat, WD40-repeat-containing domain superfamily, WD40/YVTN repeat-like-containing domain superfamily	GO:0005515|GO:0000398|GO:0071013	Reactome: R-HSA-159236|Reactome: R-HSA-72163|Reactome: R-HSA-72187|Reactome: R-HSA-73856		WD40-repeat-containing domain, WD40 repeat, WD40 repeat, WD40 repeat, WD40 repeat	WD40 repeat, WD40 repeat, WD40 repeat, WD40 repeat, WD40 repeat, WD40 repeat	WD40-repeat-containing domain superfamily		Pre-mRNA-processing factor 17
g400	1	1438035	1438670		3		2	2	3			139	1.44	Cornichon protein	Cornichon, conserved site, Cornichon	GO:0016192	Reactome: R-HSA-204005|Reactome: R-HSA-5694530			Cornichon
g401	1	1439643	1441020									384	4.17	Metallopeptidase family M24, zf-MYND-like zinc finger, mRNA-binding	Creatinase/aminopeptidase-like, Peptidase M24A, methionine aminopeptidase, subfamily 1, Peptidase M24, Peptidase M24, methionine aminopeptidase, MYND-like zinc finger, mRNA-binding	GO:0004177|GO:0006508|GO:0008235	MetaCyc: PWY-7799|MetaCyc: PWY-7800, MetaCyc: PWY-7799|MetaCyc: PWY-7800|Reactome: R-HSA-2514859	Peptidase M24A, methionine aminopeptidase, subfamily 1			Creatinase/aminopeptidase-like	Peptidase M24A, methionine aminopeptidase, subfamily 1
g402	1	1442183	1445318			1	1					643	1.56	FAD binding domain, Ribosomal protein S8	FAD-binding domain, FAD/NAD(P)-binding domain superfamily, Kynurenine 3-monooxygenase, Ribosomal protein S8, Ribosomal protein S8 superfamily	GO:0071949|GO:0004502|GO:0006569|GO:0019805|GO:0003735|GO:0005840|GO:0006412	KEGG: 00380+1.14.13.9|MetaCyc: PWY-5651|MetaCyc: PWY-6309|MetaCyc: PWY-7717|MetaCyc: PWY-7765|Reactome: R-HSA-71240, Reactome: R-HSA-156827|Reactome: R-HSA-156902|Reactome: R-HSA-1799339|Reactome: R-HSA-192823|Reactome: R-HSA-2408557|Reactome: R-HSA-6791226|Reactome: R-HSA-72649|Reactome: R-HSA-72689|Reactome: R-HSA-72695|Reactome: R-HSA-72702|Reactome: R-HSA-72706|Reactome: R-HSA-72764|Reactome:…				Ribosomal protein S8 superfamily, FAD/NAD(P)-binding domain superfamily
g403	1	1445660	1448081									720
g404	1	1450064	1451190									356	0.56	Isocitrate/isopropylmalate dehydrogenase	Isocitrate/isopropylmalate dehydrogenase, conserved site, Isopropylmalate dehydrogenase-like domain	GO:0000287|GO:0016616|GO:0051287|GO:0055114|GO:0016616|GO:0055114	Reactome: R-HSA-71403			Isopropylmalate dehydrogenase-like domain
g405	1	1451586	1454227									825	1.58	Elongation Factor G, domain II, Elongation factor G, domain IV, Elongation factor Tu GTP binding domain, Elongation factor G C-terminus, Elongation factor Tu domain 2	Ribosomal protein S5 domain 2-type fold, Elongation Factor G, domain II, Tr-type G domain, conserved site, Translation elongation factor EFG/EF2, domain IV, Translation elongation factor EFG/EF2, Transcription factor, GTP-binding domain, P-loop containing nucleoside triphosphate hydrolase, Translation protein, beta-barrel domain superfamily, Ribosomal protein S5 domain 2-type fold, subgroup, EF-G…	GO:0005525|GO:0003746|GO:0005525|GO:0006414|GO:0003924|GO:0005525	Reactome: R-HSA-5389840	Translation elongation factor EFG/EF2, domain IV, Elongation factor G, domain III, EFG, domain V	Transcription factor, GTP-binding domain	Translation elongation factor EFG/EF2, domain IV, Elongation factor EFG, domain V-like	Ribosomal protein S5 domain 2-type fold, P-loop containing nucleoside triphosphate hydrolase, Translation protein, beta-barrel domain superfamily, EF-G domain III/V-like, EF-G domain III/V-like	Translation elongation factor EFG/EF2, Small GTP-binding protein domain
g406	1	1454806	1456342	1	1	1	1	1	1			494	1.01	Eukaryotic aspartyl protease	Aspartic peptidase A1 family, Peptidase family A1 domain, Aspartic peptidase, active site, Aspartic peptidase domain superfamily, Secreted aspartic endopeptidase	GO:0004190|GO:0006508|GO:0004190		Secreted aspartic endopeptidase	Peptidase family A1 domain		Aspartic peptidase domain superfamily		Aspartic peptidase A1 family
g407	1	1457850	1459089									345	2.61	Aminotransferase class I and II	Pyridoxal phosphate-dependent transferase domain 1, Aminotransferase, class I/classII, Aminotransferases, class-I, pyridoxal-phosphate-binding site, Pyridoxal phosphate-dependent transferase, major domain, Pyridoxal phosphate-dependent transferase	GO:0003824|GO:0009058|GO:0030170|GO:0003824|GO:0009058|GO:0030170					Pyridoxal phosphate-dependent transferase
g408	1	1460720	1464118	1	9	1	5	5	7			1077	3.34	ABC-2 type transporter, ABC transporter	EGF-like domain, ABC transporter, conserved site, EGF-like, conserved site, AAA+ ATPase domain, ABC-2 type transporter, ABC transporter-like, P-loop containing nucleoside triphosphate hydrolase	GO:0005524|GO:0016887|GO:0016020	Reactome: R-HSA-1369062		EGF-like domain, ABC transporter-like	AAA+ ATPase domain	P-loop containing nucleoside triphosphate hydrolase
g409	1	1464434	1465342									302	0.33
g410	1	1465680	1467886									620	0.65	NGP1NT (NUC091) domain, 50S ribosome-binding GTPase	Circularly permuted (CP)-type guanine nucleotide-binding (G) domain, Nucleolar GTP-binding protein 2, P-loop containing nucleoside triphosphate hydrolase, Nucleolar GTP-binding protein 2, N-terminal domain, GTP-binding protein, orthogonal bundle domain superfamily, GTP binding domain	GO:0005525|GO:0005730			Circularly permuted (CP)-type guanine nucleotide-binding (G) domain		P-loop containing nucleoside triphosphate hydrolase		Nucleolar GTP-binding protein 2
g411	1	1469234	1470268		1		1	1	1			321	1.25	DUF218 domain	Domain of unknown function DUF218, Rossmann-like alpha/beta/alpha sandwich fold
g412	1	1471710	1471992									74
g413	1	1472128	1473099									323	1.24
g414	1	1473692	1474315									189
g415	1	1474516	1475562									315		Enoyl-(Acyl carrier protein) reductase	NAD(P)-binding domain superfamily, Short-chain dehydrogenase/reductase SDR						NAD(P)-binding domain superfamily
g416	1	1477906	1479699		11		6	6	11			597	1.17	Transmembrane amino acid transporter protein	Amino acid transporter, transmembrane domain
g417	1	1480798	1481126									89	1.12	LSM domain	Small nuclear ribonucleoprotein F, Sm-like protein Lsm6/SmF, LSM domain superfamily, LSM domain, eukaryotic/archaea-type	GO:0000387|GO:0005681|GO:0000398|GO:0005732	Reactome: R-HSA-111367|Reactome: R-HSA-191859|Reactome: R-HSA-72163|Reactome: R-HSA-72165|Reactome: R-HSA-73856|Reactome: R-HSA-77588, Reactome: R-HSA-72163	Small nuclear ribonucleoprotein F		LSM domain, eukaryotic/archaea-type	LSM domain superfamily		Sm-like protein Lsm6/SmF
g418	1	1481548	1483363									583	1.37
g419	1	1488388	1488723									111	0.9
g420	1	1489773	1490824									265	1.13	Enoyl-(Acyl carrier protein) reductase	Short-chain dehydrogenase/reductase SDR, NAD(P)-binding domain superfamily						NAD(P)-binding domain superfamily
g421	1	1491360	1494432		2		2	1				986	1.01	Fungal Zn(2)-Cys(6) binuclear cluster domain, Fungal specific transcription factor domain	Transcription factor domain, fungi, Zn(2)-C6 fungal-type DNA-binding domain, Zn(2)-C6 fungal-type DNA-binding domain superfamily	GO:0003677|GO:0005634|GO:0006351|GO:0008270|GO:0000981|GO:0006355|GO:0008270|GO:0042025		Zn(2)-C6 fungal-type DNA-binding domain	Zn(2)-C6 fungal-type DNA-binding domain	Transcription factor domain, fungi, Zn(2)-C6 fungal-type DNA-binding domain	Zn(2)-C6 fungal-type DNA-binding domain superfamily
g422	1	1540195	1540758									118		Prefoldin subunit	Prefoldin, Prefoldin beta-like	GO:0006457|GO:0016272|GO:0051082	Reactome: R-HSA-389957
g423	1	1541679	1543352									536
g424	1	1543477	1544565									330	0.3	Mitochondrial carrier protein, Mitochondrial carrier protein, Mitochondrial carrier protein	Mitochondrial substrate/solute carrier, Mitochondrial carrier domain superfamily, Mitochondrial glycine transporter Hem25/SLC25A38	GO:0005743|GO:0015187|GO:1904983			Mitochondrial substrate/solute carrier, Mitochondrial substrate/solute carrier, Mitochondrial substrate/solute carrier		Mitochondrial carrier domain superfamily
g425	1	1544741	1545994									417	0.48	Dor1-like family, Dor1-like family	Conserved oligomeric Golgi complex subunit 8	GO:0017119	Reactome: R-HSA-6807878|Reactome: R-HSA-6811438|Reactome: R-HSA-6811440						Conserved oligomeric Golgi complex subunit 8
g426	1	1546701	1547747		7		4	4	7			330	0.91	TLC domain	TRAM/LAG1/CLN8 homology domain	GO:0016021			TRAM/LAG1/CLN8 homology domain	TRAM/LAG1/CLN8 homology domain
g427	1	1548299	1551871									1095	0.18	Domain of unknown function (DUF1720), Variant SH3 domain, SLA1 homology domain 1, SHD1, SH3 domain, SH3 domain	Sla1, first SH3 domain, SH3-like domain superfamily, SH3 domain, Domain of unknown function DUF1720, Sterile alpha motif/pointed domain superfamily, Sla1, Sla1, third SH3 domain, SLA1 homology domain 1, SHD1, SLA1 homology domain superfamily	GO:0005515|GO:0006897|GO:0008092|GO:0030674|GO:0042802|GO:0043130		Sla1, first SH3 domain, Sla1, third SH3 domain	SH3 domain, SH3 domain, SH3 domain	SH3 domain, SH3 domain, SH3 domain	SH3-like domain superfamily, SH3-like domain superfamily, SH3-like domain superfamily		Sla1
g428	1	1552799	1561650		9		5	5	9			2009	1	Adenosine/AMP deaminase, UAA transporter family, Beta-L-arabinofuranosidase, GH127	Metal-dependent hydrolase, Six-hairpin glycosidase superfamily, AMP deaminase, Adenosine/AMP deaminase active site, Adenosine/AMP deaminase domain, UAA transporter, Beta-L-arabinofuranosidase, GH127	GO:0003824|GO:0003876|GO:0032264|GO:0009168|GO:0019239|GO:0019239|GO:0055085	KEGG: 00230+3.5.4.6|MetaCyc: PWY-6596|Reactome: R-HSA-74217, Reactome: R-HSA-74217	AMP deaminase			Metal-dependent hydrolase, Six-hairpin glycosidase superfamily	AMP deaminase	AMP deaminase
g429	1	1562746	1564532									479	1.25	WD domain, G-beta repeat, WD domain, G-beta repeat	Protein phosphatase 2A regulatory subunit PR55, Protein phosphatase 2A regulatory subunit PR55, conserved site, WD40 repeat, WD40-repeat-containing domain superfamily, WD40 repeat, conserved site	GO:0000159|GO:0019888|GO:0005515				WD40 repeat, WD40 repeat, WD40 repeat, WD40 repeat, WD40 repeat, WD40 repeat	WD40-repeat-containing domain superfamily		Protein phosphatase 2A regulatory subunit PR55
g430	1	1566541	1567470									309
g431	1	1568043	1568808	1	1	1	1	1		Non-effector	0.785	234	6.84
g432	1	1571285	1572757									453	1.1	MutS domain III	MutS, connector domain superfamily, DNA mismatch repair protein MutS, core domain superfamily, DNA mismatch repair protein MutS, core	GO:0005524|GO:0006298|GO:0030983					DNA mismatch repair protein MutS, core domain superfamily
g433	1	1573305	1575738		1		1	1				640	0.78	Membrane magnesium transporter, HMG (high mobility group) box	High mobility group box domain, Magnesium transporter, High mobility group box domain superfamily		Reactome: R-HSA-5223345		High mobility group box domain	High mobility group box domain	High mobility group box domain superfamily
g434	1	1577359	1579749									718	1.39	PHD-finger	Zinc finger, PHD-type, conserved site, Zinc finger, PHD-finger, Zinc finger, PHD-type, Zinc finger, FYVE/PHD-type, Zinc finger, RING/FYVE/PHD-type					Zinc finger, PHD-type	Zinc finger, FYVE/PHD-type
g435	1	1582344	1586873		19		10	10	17			1454	0.62	Ion transport protein, Ion transport protein, Ion transport protein, Ion transport protein	Voltage-dependent channel domain superfamily, EF-hand domain, Ion transport domain	GO:0005509|GO:0005216|GO:0006811|GO:0016020|GO:0055085			EF-hand domain
g436	1	1587819	1588103									94
g437	1	1588882	1589493		2		2	1	2			151
g438	1	1590286	1591474									325	1.23	HisG, C-terminal domain, ATP phosphoribosyltransferase	ATP phosphoribosyltransferase, catalytic domain, Nitrogen regulatory PII-like, alpha/beta, Nitrogen regulatory protein PII/ATP phosphoribosyltransferase, C-terminal, ATP phosphoribosyltransferase, conserved site, Histidine biosynthesis HisG, C-terminal, ATP phosphoribosyltransferase HisG, ATP phosphoribosyltransferase HisG, long form	GO:0000105|GO:0003879|GO:0005737|GO:0003879|GO:0000105|GO:0000287|GO:0003879|GO:0005737|GO:0000105|GO:0003879	KEGG: 00340+2.4.2.17				Nitrogen regulatory PII-like, alpha/beta	ATP phosphoribosyltransferase, catalytic domain, Histidine biosynthesis HisG, C-terminal	ATP phosphoribosyltransferase HisG
g439	1	1593540	1595283									481	0.83	Velvet factor	Velvet domain superfamily, Velvet domain, Velvet factor				Velvet domain				Velvet factor
g440	1	1597336	1597816									134		Protein of unknown function (DUF3602)	Protein of unknown function DUF3602
g441	1	1598251	1599595									366	1.64	Uroporphyrinogen decarboxylase (URO-D)	UROD/MetE-like superfamily, Uroporphyrinogen decarboxylase HemE, Uroporphyrinogen decarboxylase (URO-D)	GO:0004853|GO:0006779	Reactome: R-HSA-189451, KEGG: 00860+4.1.1.37|MetaCyc: PWY-5531|MetaCyc: PWY-7159|MetaCyc: PWY-7766|Reactome: R-HSA-189451	Uroporphyrinogen decarboxylase HemE			UROD/MetE-like superfamily	Uroporphyrinogen decarboxylase HemE
g442	1	1600024	1600464		2		2	1	2			118		Rab5-interacting protein (Rab5ip)	Rab5-interacting protein family, ER membrane protein complex subunit 6	GO:0005783|GO:0016021|GO:0072546							ER membrane protein complex subunit 6
g443	1	1600641	1603274									877	0.57	Elongation factor Tu GTP binding domain	P-loop containing nucleoside triphosphate hydrolase, Transcription factor, GTP-binding domain	GO:0003924|GO:0005525					P-loop containing nucleoside triphosphate hydrolase
g444	1	1605655	1606979									423			Target SNARE coiled-coil homology domain				Target SNARE coiled-coil homology domain	Target SNARE coiled-coil homology domain, Target SNARE coiled-coil homology domain
g445	1	1607963	1610302									779	1.03	Helicase conserved C-terminal domain, Helicase associated domain (HA2), Oligonucleotide/oligosaccharide-binding (OB)-fold	Helicase superfamily 1/2, ATP-binding domain, Helicase, C-terminal, Helicase-associated domain, DNA/RNA helicase, ATP-dependent, DEAH-box type, conserved site, P-loop containing nucleoside triphosphate hydrolase, Domain of unknown function DUF1605	GO:0004386			Helicase, C-terminal, Helicase superfamily 1/2, ATP-binding domain	Helicase superfamily 1/2, ATP-binding domain, Helicase-associated domain, Helicase, C-terminal	P-loop containing nucleoside triphosphate hydrolase
g446	1	1610500	1610993									130		Complex1_LYR-like	Succinate dehydrogenase assembly factor 3, mitochondrial	GO:0005739|GO:0034553							Succinate dehydrogenase assembly factor 3, mitochondrial
g447	1	1611269	1612399									358	0.56
g448	1	1612619	1613935									438	2.05	Inhibitor of growth proteins N-terminal histone-binding	Zinc finger, PHD-type, Inhibitor of growth protein, N-terminal histone-binding, Zinc finger, PHD-type, conserved site, Zinc finger, PHD-finger, ING family, Zinc finger, RING/FYVE/PHD-type, Zinc finger, FYVE/PHD-type				Zinc finger, PHD-finger	Zinc finger, PHD-type, Inhibitor of growth protein, N-terminal histone-binding	Zinc finger, FYVE/PHD-type		ING family
g449	1	1615205	1616704									499	1.8	Histone deacetylase domain	Histone deacetylase domain, Histone deacetylase domain superfamily, Histone deacetylase, Histone deacetylase family, Ureohydrolase domain superfamily	GO:0004407|GO:0016575	Reactome: R-HSA-2122947|Reactome: R-HSA-2644606|Reactome: R-HSA-2894862|Reactome: R-HSA-350054, Reactome: R-HSA-2122947|Reactome: R-HSA-2644606|Reactome: R-HSA-2894862|Reactome: R-HSA-3214815|Reactome: R-HSA-350054				Ureohydrolase domain superfamily
g450	1	1617488	1618553	1		1	1			Non-effector	0.952	319	1.88	Glycoside-hydrolase family GH114	Aldolase-type TIM barrel, Glycoside hydrolase superfamily, Glycoside-hydrolase family GH114, TIM-barrel domain	GO:0003824					Glycoside hydrolase superfamily
g451	1	1619618	1621457		11		6	6	10			567	1.23	Major Facilitator Superfamily	Major facilitator superfamily, MFS transporter superfamily	GO:0022857|GO:0055085					MFS transporter superfamily
g452	1	1622855	1625518			1	1					457	2.84	Beta-glucosidase (SUN family)	SUN family
g453	1	1633238	1635076									612	1.14	Zinc finger, C2H2 type, Zinc finger, C2H2 type	Zinc finger C2H2-type, Zinc finger C2H2 superfamily				Zinc finger C2H2-type, Zinc finger C2H2-type, Zinc finger C2H2-type	Zinc finger C2H2-type, Zinc finger C2H2-type, Zinc finger C2H2-type	Zinc finger C2H2 superfamily, Zinc finger C2H2 superfamily
g454	1	1636240	1638010		2		1	2	2			510	0.39	Diacylglycerol acyltransferase	Diacylglycerol acyltransferase	GO:0016747
g455	1	1638458	1639935									447	1.12	Xylose isomerase-like TIM barrel	AP endonuclease 2, Xylose isomerase-like, TIM barrel domain, AP endonuclease 2, zinc binding site, Xylose isomerase-like superfamily	GO:0003677|GO:0006281|GO:0008270|GO:0008270		AP endonuclease 2	AP endonuclease 2	AP endonuclease 2	Xylose isomerase-like superfamily	AP endonuclease 2	AP endonuclease 2
g456	1	1640421	1644248									1223	0.65	Mad3/BUB1 homology region 1, Mad3/BUB1 homology region 2, Protein kinase domain	Mad3/Bub1 homology region 1, Mitotic spindle checkpoint protein Bub1/Mad3, Mad3/Bub1 homology region 2, Protein kinase domain, Protein kinase-like domain superfamily, Serine/threonine-protein kinase, active site	GO:0007094|GO:0004672|GO:0005524|GO:0006468|GO:0004672|GO:0006468	Reactome: R-HSA-141444|Reactome: R-HSA-2467813|Reactome: R-HSA-2500257|Reactome: R-HSA-5663220|Reactome: R-HSA-68877|Reactome: R-HSA-9648025		Mad3/Bub1 homology region 1, Protein kinase domain	Protein kinase domain, Mad3/Bub1 homology region 1	Protein kinase-like domain superfamily		Mitotic spindle checkpoint protein Bub1/Mad3
g457	1	1644827	1646317									438	0.68	Enolase, C-terminal TIM barrel domain, Enolase, N-terminal domain	Enolase, Enolase, conserved site, Enolase, C-terminal TIM barrel domain, Enolase-like, N-terminal, Enolase-like, C-terminal domain superfamily, Enolase, N-terminal	GO:0000015|GO:0000287|GO:0004634|GO:0006096	KEGG: 00010+4.2.1.11|KEGG: 00680+4.2.1.11|MetaCyc: PWY-1042|MetaCyc: PWY-1622|MetaCyc: PWY-2221|MetaCyc: PWY-5484|MetaCyc: PWY-5723|MetaCyc: PWY-6142|MetaCyc: PWY-6886|MetaCyc: PWY-6901|MetaCyc: PWY-7003|MetaCyc: PWY-7124|MetaCyc: PWY-7218|MetaCyc: PWY-8004, KEGG: 00010+4.2.1.11|KEGG: 00680+4.2.1.11|MetaCyc: PWY-1042|MetaCyc: PWY-1622|MetaCyc: PWY-2221|MetaCyc: PWY-5484|MetaCyc: PWY-5723|MetaCyc:…	Enolase		Enolase, C-terminal TIM barrel domain, Enolase, N-terminal	Enolase-like, C-terminal domain superfamily, Enolase-like, N-terminal	Enolase	Enolase
g458	1	1648700	1649587									256	0.39	Krr1 KH1 domain	K Homology domain, type 1 superfamily, Krr1, KH1 domain, Pre-rRNA-processing protein PNO1-like, K Homology domain	GO:0003723|GO:0003676	Reactome: R-HSA-6790901|Reactome: R-HSA-6791226			K Homology domain	K Homology domain, type 1 superfamily		Pre-rRNA-processing protein PNO1-like
g459	1	1650647	1652333		2		2	1	1			545	0.55	Yeast mitochondrial distribution and morphology (MDM) proteins	Mitochondrial distribution and morphology protein family 31/32, fungi	GO:0000001|GO:0005743|GO:0007005							Mitochondrial distribution and morphology protein family 31/32, fungi
g460	1	1653218	1654327									276		Translation initiation factor eIF3 subunit	Eukaryotic translation initiation factor 3 subunit J, Eukaryotic translation initiation factor 3-like domain superfamily	GO:0003743|GO:0005737|GO:0005852	Reactome: R-HSA-156827|Reactome: R-HSA-72649|Reactome: R-HSA-72689|Reactome: R-HSA-72695|Reactome: R-HSA-72702|Reactome: R-HSA-72706						Eukaryotic translation initiation factor 3 subunit J
g461	1	1656607	1657781		2		2	1				353	1.13	Alternative oxidase	Alternative oxidase, Alternative oxidase superfamily	GO:0009916|GO:0055114		Alternative oxidase					Alternative oxidase
g462	1	1660955	1663176									723	0.97	Zinc finger, C2H2 type, Zinc finger, C2H2 type	Zinc finger C2H2-type, Zinc finger C2H2 superfamily				Zinc finger C2H2-type, Zinc finger C2H2-type	Zinc finger C2H2-type, Zinc finger C2H2-type	Zinc finger C2H2 superfamily
g463	1	1663960	1664553			1	1					197	1.52
g464	1	1670214	1680790									3356	0.09
g465	1	1681843	1684576									866	0.23	TATA element modulatory factor 1 TATA binding, TATA element modulatory factor 1 DNA binding	TATA element modulatory factor 1, TATA binding, TATA element modulatory factor 1 DNA binding		Reactome: R-HSA-6811440
g466	1	1684717	1685861									235		Ankyrin repeats (3 copies), Ankyrin repeats (3 copies)	Ankyrin repeat, Ankyrin repeat-containing domain, Ankyrin repeat-containing domain superfamily	GO:0005515			Ankyrin repeat, Ankyrin repeat, Ankyrin repeat, Ankyrin repeat-containing domain, Ankyrin repeat, Ankyrin repeat, Ankyrin repeat	Ankyrin repeat, Ankyrin repeat, Ankyrin repeat, Ankyrin repeat, Ankyrin repeat, Ankyrin repeat	Ankyrin repeat-containing domain superfamily
g467	1	1686233	1687725									459	1.09	WD domain, G-beta repeat, WD domain, G-beta repeat, WD domain, G-beta repeat, WD domain, G-beta repeat, WD domain, G-beta repeat, WD domain, G-beta repeat, WD domain, G-beta repeat	WD40 repeat, WD40-repeat-containing domain superfamily, WD40-repeat-containing domain, WD40 repeat, conserved site, G-protein beta WD-40 repeat, WD40/YVTN repeat-like-containing domain superfamily	GO:0005515			WD40-repeat-containing domain, WD40 repeat, WD40 repeat, WD40 repeat, WD40 repeat, WD40 repeat	WD40 repeat, WD40 repeat, WD40 repeat, WD40 repeat, WD40 repeat, WD40 repeat, WD40 repeat	WD40-repeat-containing domain superfamily
g468	1	1687809	1689894									642	1.25	AAA lid domain, BAH domain, ATPase family associated with various cellular activities (AAA)	Origin recognition complex, subunit 1, AAA lid domain, Bromo adjacent homology (BAH) domain superfamily, AAA+ ATPase domain, Bromo adjacent homology (BAH) domain, P-loop containing nucleoside triphosphate hydrolase, ATPase, AAA-type, core	GO:0003682|GO:0005524	Reactome: R-HSA-113507|Reactome: R-HSA-176187|Reactome: R-HSA-68616|Reactome: R-HSA-68689|Reactome: R-HSA-68827|Reactome: R-HSA-68867|Reactome: R-HSA-68949|Reactome: R-HSA-68962|Reactome: R-HSA-69205, Reactome: R-HSA-176187|Reactome: R-HSA-68689|Reactome: R-HSA-68827|Reactome: R-HSA-68867|Reactome: R-HSA-68949|Reactome: R-HSA-68962|Reactome: R-HSA-69205		Bromo adjacent homology (BAH) domain	AAA+ ATPase domain	P-loop containing nucleoside triphosphate hydrolase		Origin recognition complex, subunit 1
g469	1	1691800	1692765									287	1.05
g470	1	1692883	1696089									706	1.27	Prefoldin subunit, tRNA synthetase class II core domain (G, H, P, S and T)	Proline-tRNA ligase, class IIa, Anticodon-binding domain superfamily, Prefoldin alpha subunit, archaea-type, Prefoldin, Prefoldin alpha-like, Aminoacyl-tRNA synthetase, class II, Aminoacyl-tRNA synthetase, class II (G/ P/ S/T)	GO:0004827|GO:0005524|GO:0005737|GO:0006433|GO:0006457|GO:0016272|GO:0051082|GO:0000166|GO:0004812|GO:0005524|GO:0006418	KEGG: 00970+6.1.1.15|Reactome: R-HSA-379726, Reactome: R-HSA-389957		Aminoacyl-tRNA synthetase, class II			Prefoldin alpha subunit, archaea-type
g471	1	1696375	1699503									986	0.41	CBF/Mak21 family	CCAAT-binding factor, Armadillo-type fold, CEBPZ/Mak21-like	GO:0042254					Armadillo-type fold		CEBPZ/Mak21-like
g472	1	1699672	1700271									147
g473	1	1700846	1701785						1			271	1.11	Thioesterase superfamily	Thioesterase domain, HotDog domain superfamily		Reactome: R-HSA-77289				HotDog domain superfamily
g474	1	1702558	1703345									207	0.48	Adenylylsulphate kinase	Adenylyl-sulfate kinase, P-loop containing nucleoside triphosphate hydrolase	GO:0000103|GO:0004020|GO:0005524	KEGG: 00230+2.7.1.25|KEGG: 00920+2.7.1.25|MetaCyc: PWY-5340|Reactome: R-HSA-174362|Reactome: R-HSA-2408550	Adenylyl-sulfate kinase			P-loop containing nucleoside triphosphate hydrolase	Adenylyl-sulfate kinase
g475	1	1703540	1704932									393	0.76	V-ATPase subunit C	ATPase, V1 complex, subunit C, Vacuolar ATP synthase subunit C superfamily	GO:0015078|GO:0033180|GO:1902600	Reactome: R-HSA-1222556|Reactome: R-HSA-77387|Reactome: R-HSA-917977|Reactome: R-HSA-9639288|Reactome: R-HSA-983712	ATPase, V1 complex, subunit C			Vacuolar ATP synthase subunit C superfamily		ATPase, V1 complex, subunit C
g476	1	1705838	1708650									419	0.72
g477	1	1709795	1711430									526	0.76	F-box-like	F-box domain, F-box-like domain superfamily	GO:0005515			F-box domain	F-box domain	F-box-like domain superfamily
g478	1	1717009	1718148									361	0.28
g479	1	1718536	1719301									238	0.42	Modifier of rudimentary (Mod(r)) protein	Modifier of rudimentary, Modr, Helix hairpin bin domain superfamily, Vacuolar protein sorting-associated protein 37, ESCRT assembly domain	GO:0000813|GO:0032509	Reactome: R-HSA-162588|Reactome: R-HSA-174490|Reactome: R-HSA-917729|Reactome: R-HSA-9610379|Reactome: R-HSA-9615710		Modifier of rudimentary, Modr		ESCRT assembly domain		Vacuolar protein sorting-associated protein 37
g480	1	1719803	1722678									905	1.1	Nuclear pore protein 84 / 107	Nuclear pore protein 84/107	GO:0005643|GO:0017056	Reactome: R-HSA-1169408|Reactome: R-HSA-141444|Reactome: R-HSA-159227|Reactome: R-HSA-159230|Reactome: R-HSA-159231|Reactome: R-HSA-159236|Reactome: R-HSA-165054|Reactome: R-HSA-168271|Reactome: R-HSA-168276|Reactome: R-HSA-168325|Reactome: R-HSA-168333|Reactome: R-HSA-170822|Reactome: R-HSA-180746|Reactome: R-HSA-180910|Reactome: R-HSA-191859|Reactome: R-HSA-2467813|Reactome: R-HSA-2500257|React…						Nuclear pore protein 84/107
g481	1	1724960	1725369									98	1.02	Ubiquitin-2 like Rad60 SUMO-like	Ubiquitin-like domain, Ubiquitin-like domain superfamily, Rad60/SUMO-like domain	GO:0005515			Ubiquitin-like domain	Ubiquitin-like domain	Ubiquitin-like domain superfamily
g482	1	1726061	1728504									792	2.65	LIM domain, LIM domain, LIM domain	Zinc finger, LIM-type				Zinc finger, LIM-type, Zinc finger, LIM-type, Zinc finger, LIM-type	Zinc finger, LIM-type, Zinc finger, LIM-type, Zinc finger, LIM-type
g483	1	1729134	1729644									101	3.96
g484	1	1730311	1732965									816	0.98	Dynamin central region, Dynamin GTPase effector domain, Dynamin family	Dynamin, GTPase region, conserved site, Dynamin superfamily, Dynamin central domain, GTPase effector domain, P-loop containing nucleoside triphosphate hydrolase, Dynamin GTPase effector, Dynamin-type guanine nucleotide-binding (G) domain, Dynamin, GTPase domain	GO:0005525|GO:0003924|GO:0005525		Dynamin, GTPase domain	GTPase effector domain, Dynamin-type guanine nucleotide-binding (G) domain	Dynamin GTPase effector, Dynamin, GTPase domain	P-loop containing nucleoside triphosphate hydrolase		Dynamin superfamily
g485	1	1733664	1737095									1143	0.7
g486	1	1738488	1740824									658	0.61
g487	1	1743421	1744228									252	0.79	Glutaredoxin, Thioredoxin	Glutaredoxin, PICOT-like, Thioredoxin-like superfamily, Glutaredoxin, Monothiol glutaredoxin-related, Thioredoxin domain	GO:0009055|GO:0015035		Glutaredoxin, PICOT-like	Glutaredoxin, Thioredoxin domain		Thioredoxin-like superfamily, Thioredoxin-like superfamily		Monothiol glutaredoxin-related, Monothiol glutaredoxin-related
g488	1	1745330	1747891									818	0.12	SH3 domain, Cofilin/tropomyosin-type actin-binding protein, Variant SH3 domain	SH3 domain, Actin-depolymerising factor homology domain, SH3-like domain superfamily, Fungal actin-binding protein 1, second SH3 domain, ADF-H/Gelsolin-like domain superfamily, Fungal actin-binding protein 1, first SH3 domain	GO:0005515|GO:0003779		Fungal actin-binding protein 1, second SH3 domain, Fungal actin-binding protein 1, first SH3 domain	Actin-depolymerising factor homology domain, SH3 domain, SH3 domain	SH3 domain, SH3 domain, Actin-depolymerising factor homology domain	SH3-like domain superfamily, SH3-like domain superfamily
g489	1	1748371	1748885									108	11.11
g490	1	1750282	1752156									576	0.87	Eukaryotic translation initiation factor 3 subunit 7 (eIF-3)	Eukaryotic translation initiation factor 3 subunit D	GO:0003743|GO:0005737|GO:0005852	Reactome: R-HSA-156827|Reactome: R-HSA-72649|Reactome: R-HSA-72689|Reactome: R-HSA-72695|Reactome: R-HSA-72702|Reactome: R-HSA-72706						Eukaryotic translation initiation factor 3 subunit D
g491	1	1752713	1754098									361	1.39
g492	1	1758716	1764517									1917	0.89	Response regulator receiver domain, Protein kinase domain, Protein kinase domain	Signal transduction response regulator, receiver domain, Protein kinase domain, PAS domain, Serine/threonine-protein kinase, active site, CheY-like superfamily, AGC-kinase, C-terminal, PAS domain superfamily, Protein kinase-like domain superfamily	GO:0000160|GO:0004672|GO:0005524|GO:0006468|GO:0004672|GO:0006468|GO:0004674|GO:0005524|GO:0006468		Signal transduction response regulator, receiver domain	Protein kinase domain, AGC-kinase, C-terminal, PAS domain, Signal transduction response regulator, receiver domain	AGC-kinase, C-terminal, Signal transduction response regulator, receiver domain, Protein kinase domain	CheY-like superfamily, PAS domain superfamily, Protein kinase-like domain superfamily	PAS domain
g493	1	1768177	1770248		9		5	5	9			670	1.04	Sugar (and other) transporter, Sugar (and other) transporter	Major facilitator, sugar transporter-like, MFS transporter superfamily	GO:0016021|GO:0022857|GO:0055085					MFS transporter superfamily
g494	1	1770937	1774572									865	2.89		Zinc finger C2H2-type					Zinc finger C2H2-type, Zinc finger C2H2-type, Zinc finger C2H2-type, Zinc finger C2H2-type, Zinc finger C2H2-type, Zinc finger C2H2-type
g495	1	1779455	1780818									436	0.92	Choline/ethanolamine kinase	Protein kinase-like domain superfamily						Protein kinase-like domain superfamily
g496	1	1782810	1785044									708	0.71	Nitrogen Permease regulator of amino acid transport activity 3	Nitrogen permease regulator 3	GO:0032007|GO:0034198	Reactome: R-HSA-9639288						Nitrogen permease regulator 3
g497	1	1785846	1787411									521		Helix-loop-helix DNA-binding domain	Helix-loop-helix DNA-binding domain superfamily, Myc-type, basic helix-loop-helix (bHLH) domain	GO:0046983		Myc-type, basic helix-loop-helix (bHLH) domain	Myc-type, basic helix-loop-helix (bHLH) domain	Myc-type, basic helix-loop-helix (bHLH) domain	Helix-loop-helix DNA-binding domain superfamily
g498	1	1790985	1793252		4		2	3	4			325	1.23	Got1/Sft2-like family	Vesicle transport protein SFT2, Vesicle transport protein, Got1/SFT2-like	GO:0016021|GO:0016192|GO:0016192							Vesicle transport protein SFT2
g499	1	1796586	1798974									764	0.39	La domain	Winged helix-like DNA-binding domain superfamily, La-type HTH domain, Winged helix DNA-binding domain superfamily				La-type HTH domain	La-type HTH domain	Winged helix DNA-binding domain superfamily
g500	1	1802563	1804223		12		6	7	12			534	0.94	Major Facilitator Superfamily	Major facilitator superfamily domain, MFS transporter superfamily, Major facilitator superfamily	GO:0022857|GO:0022857|GO:0055085			Major facilitator superfamily domain		MFS transporter superfamily
g501	1	1806420	1808552									710	0.14
g502	1	1810181	1812205									674	0.74	Tetratricopeptide repeat, HAT (Half-A-TPR) repeat	Tetratricopeptide repeat, Tetratricopeptide-like helical domain superfamily, Tetratricopeptide repeat-containing domain, HAT (Half-A-TPR) repeat	GO:0005515|GO:0006396			Tetratricopeptide repeat, Tetratricopeptide repeat, Tetratricopeptide repeat-containing domain, Tetratricopeptide repeat, Tetratricopeptide repeat, Tetratricopeptide repeat-containing domain, Tetratricopeptide repeat-containing domain, Tetratricopeptide repeat	HAT (Half-A-TPR) repeat, HAT (Half-A-TPR) repeat, HAT (Half-A-TPR) repeat, HAT (Half-A-TPR) repeat, HAT (Half-A-TPR) repeat, HAT (Half-A-TPR) repeat, HAT (Half-A-TPR) repeat, HAT (Half-A-TPR) repeat, HAT (Half-A-TPR) repeat, HAT (Half-A-TPR) repeat, HAT (Half-A-TPR) repeat, HAT (Half-A-TPR) repeat, HAT (Half-A-TPR) repeat, HAT (Half-A-TPR) repeat, HAT (Half-A-TPR) repeat	Tetratricopeptide-like helical domain superfamily, Tetratricopeptide-like helical domain superfamily, Tetratricopeptide-like helical domain superfamily, Tetratricopeptide-like helical domain superfamily
g503	1	1812535	1814427									630	0.48	Prp31 C terminal domain, snoRNA binding domain, fibrillarin	Nop domain, Prp31 C-terminal, Helix hairpin bin domain superfamily, Nop domain superfamily, Nop, C-terminal domain, NOSIC, U4/U6 small nuclear ribonucleoprotein Prp31	GO:0000244|GO:0000398|GO:0046540	Reactome: R-HSA-72163		Nop domain	NOSIC	Nop domain superfamily		U4/U6 small nuclear ribonucleoprotein Prp31
g504	1	1821712	1822258		3		2	2	3			160	3.75
g505	1	1822585	1823484									299	1.67		Zinc finger C2H2-type, Zinc finger C2H2 superfamily				Zinc finger C2H2-type, Zinc finger C2H2-type	Zinc finger C2H2-type, Zinc finger C2H2-type	Zinc finger C2H2 superfamily
g506	1	1824785	1826218									415	1.45	Acetokinase family	Acetate/propionate kinase, Aliphatic acid kinase, short-chain, conserved site, ATPase, nucleotide binding domain, Aliphatic acid kinase, short-chain	GO:0006082|GO:0016301|GO:0016774|GO:0016301|GO:0016310|GO:0016774	KEGG: 00430+2.7.2.1|KEGG: 00620+2.7.2.1|KEGG: 00640+2.7.2.1|KEGG: 00680+2.7.2.1|KEGG: 00720+2.7.2.1|MetaCyc: PWY-5482|MetaCyc: PWY-5485|MetaCyc: PWY-5497|MetaCyc: PWY-8015|MetaCyc: PWY-8086				ATPase, nucleotide binding domain, ATPase, nucleotide binding domain	Acetate/propionate kinase	Aliphatic acid kinase, short-chain
g507	1	1826729	1828126									391	0.77
g508	1	1831195	1833572		12		6	7	12			681	1.76	Sugar (and other) transporter, Sugar (and other) transporter	Sugar transporter, conserved site, Major facilitator superfamily domain, Major facilitator, sugar transporter-like, MFS transporter superfamily	GO:0016021|GO:0022857|GO:0055085|GO:0022857			Major facilitator superfamily domain		MFS transporter superfamily
g509	1	1834405	1835739									407	1.72	Glutathione S-transferase, N-terminal domain	Thioredoxin-like superfamily, Glutathione S-transferase, N-terminal	GO:0005515			Glutathione S-transferase, N-terminal		Thioredoxin-like superfamily
g510	1	1836566	1839402									857	2.22	Fungal Zn(2)-Cys(6) binuclear cluster domain, Fungal specific transcription factor domain	Zn(2)-C6 fungal-type DNA-binding domain superfamily, Zn(2)-C6 fungal-type DNA-binding domain, Transcription factor domain, fungi	GO:0000981|GO:0006355|GO:0008270|GO:0042025|GO:0003677|GO:0005634|GO:0006351|GO:0008270		Zn(2)-C6 fungal-type DNA-binding domain	Zn(2)-C6 fungal-type DNA-binding domain	Zn(2)-C6 fungal-type DNA-binding domain, Transcription factor domain, fungi	Zn(2)-C6 fungal-type DNA-binding domain superfamily
g511	1	1841230	1842471									336	2.38	WD domain, G-beta repeat, WD domain, G-beta repeat, WD domain, G-beta repeat	G-protein beta WD-40 repeat, WD40 repeat, conserved site, WD40 repeat, WD40-repeat-containing domain, WD40/YVTN repeat-like-containing domain superfamily, TREX component Tex1/THOC3, WD40-repeat-containing domain superfamily	GO:0005515|GO:0006406	Reactome: R-HSA-159236|Reactome: R-HSA-72187|Reactome: R-HSA-73856		WD40 repeat, WD40-repeat-containing domain, WD40 repeat, WD40 repeat	WD40 repeat, WD40 repeat, WD40 repeat, WD40 repeat, WD40 repeat, WD40 repeat	WD40-repeat-containing domain superfamily		TREX component Tex1/THOC3
g512	1	1843625	1845233									480	0.21	Cyclin, N-terminal domain, Cyclin, C-terminal domain	Cyclin, N-terminal, Cyclin-like, Cyclin-like superfamily, Cyclin, Cyclin, C-terminal domain	GO:0042025		Cyclin-like, Cyclin-like		Cyclin, C-terminal domain, Cyclin-like, Cyclin-like	Cyclin-like superfamily, Cyclin-like superfamily		Cyclin
g513	1	1846754	1847980									372	0.81	Ribosomal Proteins L2, RNA binding domain, Ribosomal Proteins L2, C-terminal domain	Ribosomal protein L2, bacterial/organellar-type, Ribosomal protein L2, domain 2, Ribosomal protein L2, C-terminal, Ribosomal Proteins L2, RNA binding domain, Ribosomal protein L2, domain 3, Ribosomal protein L2, conserved site, Translation protein SH3-like domain superfamily, Ribosomal protein L2, Nucleic acid-binding, OB-fold	GO:0003723|GO:0003735|GO:0006412|GO:0015934|GO:0016740|GO:0003735|GO:0005840|GO:0006412	Reactome: R-HSA-156827|Reactome: R-HSA-156902|Reactome: R-HSA-1799339|Reactome: R-HSA-192823|Reactome: R-HSA-2408557|Reactome: R-HSA-6791226|Reactome: R-HSA-72689|Reactome: R-HSA-72706|Reactome: R-HSA-72764|Reactome: R-HSA-9010553|Reactome: R-HSA-9633012|Reactome: R-HSA-975956|Reactome: R-HSA-975957			Ribosomal protein L2, C-terminal, Ribosomal protein L2	Translation protein SH3-like domain superfamily, Nucleic acid-binding, OB-fold	Ribosomal protein L2, bacterial/organellar-type	Ribosomal protein L2
g514	1	1850614	1852065		5		3	3	6			464	0.65	PAP2 superfamily	Phosphatidic acid phosphatase type 2/haloperoxidase, Phospholipid phosphatase, Phosphatidic acid phosphatase type 2/haloperoxidase superfamily	GO:0006644|GO:0008195				Phosphatidic acid phosphatase type 2/haloperoxidase	Phosphatidic acid phosphatase type 2/haloperoxidase superfamily		Phospholipid phosphatase
g515	1	1852825	1853818									256	2.34	Casein kinase II regulatory subunit	Casein kinase II, regulatory subunit, N-terminal, Casein kinase II, regulatory subunit, Casein kinase II subunit beta-like	GO:0005956|GO:0019887	Reactome: R-HSA-1483191|Reactome: R-HSA-201688|Reactome: R-HSA-2514853|Reactome: R-HSA-445144|Reactome: R-HSA-6798695|Reactome: R-HSA-6804756|Reactome: R-HSA-6814122|Reactome: R-HSA-8934903|Reactome: R-HSA-8939243|Reactome: R-HSA-8948751			Casein kinase II, regulatory subunit	Casein kinase II subunit beta-like		Casein kinase II, regulatory subunit
g516	1	1854671	1858035									1087	0.83	RIC1	RAB6A-GEF complex partner protein 1, WD40/YVTN repeat-like-containing domain superfamily, WD40 repeat, WD40-repeat-containing domain superfamily, Ribosome control protein 1	GO:0006886|GO:0034066|GO:0005515	Reactome: R-HSA-6811438|Reactome: R-HSA-6811440|Reactome: R-HSA-8876198			WD40 repeat, WD40 repeat, WD40 repeat, WD40 repeat	WD40-repeat-containing domain superfamily		RAB6A-GEF complex partner protein 1
g517	1	1862294	1864131									559	1.25	Aminotransferase class I and II	Pyridoxal phosphate-dependent transferase, major domain, Pyridoxal phosphate-dependent transferase, Aminotransferase, class I/classII	GO:0003824|GO:0009058|GO:0030170					Pyridoxal phosphate-dependent transferase
g518	1	1864310	1866021		1		1	1				533	0.56	Cytochrome P450	Cytochrome P450, E-class, group I, Cytochrome P450, conserved site, Cytochrome P450 superfamily, Cytochrome P450	GO:0005506|GO:0016705|GO:0020037|GO:0055114|GO:0016705|GO:0055114					Cytochrome P450 superfamily
g519	1	1867423	1869314	1		1	1			Non-effector	0.991	583	1.03	beta-acetyl hexosaminidase like, Glycosyl hydrolase family 20, catalytic domain	Beta-hexosaminidase, eukaryotic type, N-terminal, Glycoside hydrolase family 20, catalytic domain, Beta-hexosaminidase, Beta-hexosaminidase-like, domain 2, Glycoside hydrolase superfamily	GO:0004553|GO:0005975|GO:0004563|GO:0005975	KEGG: 00511+3.2.1.52|KEGG: 00513+3.2.1.52|KEGG: 00520+3.2.1.52|KEGG: 00531+3.2.1.52|KEGG: 00603+3.2.1.52|KEGG: 00604+3.2.1.52|MetaCyc: PWY-6902|MetaCyc: PWY-7822|MetaCyc: PWY-7883|Reactome: R-HSA-1660662|Reactome: R-HSA-2022857|Reactome: R-HSA-2024101|Reactome: R-HSA-2160916, KEGG: 00511+3.2.1.52|KEGG: 00513+3.2.1.52|KEGG: 00520+3.2.1.52|KEGG: 00531+3.2.1.52|KEGG: 00603+3.2.1.52|KEGG: 00604+3.2.1…				Beta-hexosaminidase-like, domain 2, Glycoside hydrolase superfamily
g520	1	1871837	1873351									486	3.09	RNA-binding, Nab2-type zinc finger, RNA-binding, Nab2-type zinc finger, RNA-binding, Nab2-type zinc finger, RNA-binding, Nab2-type zinc finger	Nuclear polyadenylated RNA-binding protein Nab2/ZC3H14	GO:0008143|GO:0043488|GO:1900364							Nuclear polyadenylated RNA-binding protein Nab2/ZC3H14, Nuclear polyadenylated RNA-binding protein Nab2/ZC3H14
g521	1	1873987	1875883			1	1		1			595	0.34	Flavin containing amine oxidoreductase	Amine oxidase, FAD/NAD(P)-binding domain superfamily, Protoporphyrinogen oxidase	GO:0016491|GO:0055114|GO:0004729|GO:0006779|GO:0055114	KEGG: 00860+1.3.3.4|MetaCyc: PWY-7159|Reactome: R-HSA-189451				FAD/NAD(P)-binding domain superfamily	Protoporphyrinogen oxidase
g522	1	1876287	1879455									1019	0.49	Mediator complex subunit MED14	Mediator complex, subunit Med14	GO:0003712|GO:0006357|GO:0016592	Reactome: R-HSA-1989781|Reactome: R-HSA-212436|Reactome: R-HSA-381340						Mediator complex, subunit Med14
g523	1	1880394	1882374									500	1.2	Glucose-6-phosphate dehydrogenase, C-terminal domain, Glucose-6-phosphate dehydrogenase, NAD binding domain	Glucose-6-phosphate dehydrogenase, Glucose-6-phosphate dehydrogenase, C-terminal, Glucose-6-phosphate dehydrogenase, active site, Glucose-6-phosphate dehydrogenase, NAD-binding, NAD(P)-binding domain superfamily	GO:0006006|GO:0055114|GO:0004345|GO:0006006|GO:0050661|GO:0055114|GO:0004345|GO:0006006|GO:0055114|GO:0006006|GO:0016614|GO:0050661|GO:0055114	KEGG: 00030+1.1.1.49|KEGG: 00480+1.1.1.49|MetaCyc: PWY-7268|MetaCyc: PWY-8004				NAD(P)-binding domain superfamily	Glucose-6-phosphate dehydrogenase	Glucose-6-phosphate dehydrogenase
g524	1	1883108	1883478									67	7.46
g525	1	1885084	1885801									109		Ribosomal protein L35Ae	Ribosomal protein L35A, Ribosomal protein L35A superfamily, Translation protein, beta-barrel domain superfamily, Ribosomal protein L35Ae, conserved site	GO:0003735|GO:0005840|GO:0006412	Reactome: R-HSA-156827|Reactome: R-HSA-156902|Reactome: R-HSA-1799339|Reactome: R-HSA-192823|Reactome: R-HSA-2408557|Reactome: R-HSA-6791226|Reactome: R-HSA-72689|Reactome: R-HSA-72706|Reactome: R-HSA-72764|Reactome: R-HSA-9010553|Reactome: R-HSA-9633012|Reactome: R-HSA-975956|Reactome: R-HSA-975957				Translation protein, beta-barrel domain superfamily		Ribosomal protein L35A
g526	1	1891341	1892680									390		Uncharacterised protein (DUF2406)	Protein of unknown function DUF2406								Protein of unknown function DUF2406
g527	1	1893332	1893799		2		1	2	2			104		VMA21-like domain	Vacuolar ATPase assembly integral membrane protein Vma21	GO:0070072							Vacuolar ATPase assembly integral membrane protein Vma21
g528	1	1894766	1897683									955	1.47	Helicase conserved C-terminal domain, SNF2 family N-terminal domain	Helicase, C-terminal, UBA-like superfamily, SNF2-like, N-terminal domain superfamily, SNF2-related, N-terminal domain, Helicase superfamily 1/2, ATP-binding domain, P-loop containing nucleoside triphosphate hydrolase	GO:0005515|GO:0005524			Helicase, C-terminal, Helicase superfamily 1/2, ATP-binding domain	Helicase superfamily 1/2, ATP-binding domain, Helicase, C-terminal	UBA-like superfamily, P-loop containing nucleoside triphosphate hydrolase, P-loop containing nucleoside triphosphate hydrolase
g529	1	1899497	1900249									250	1.2		Myb-like domain				Myb-like domain
g530	1	1906169	1908420									732	1.09	Sel1 repeat, Sel1 repeat, Sel1 repeat, Sel1 repeat, Sel1 repeat, Sel1 repeat, Sel1 repeat	Sel1-like repeat, Tetratricopeptide-like helical domain superfamily	GO:0005515				Sel1-like repeat, Sel1-like repeat, Sel1-like repeat, Sel1-like repeat, Sel1-like repeat, Sel1-like repeat, Sel1-like repeat
g531	1	1914272	1917988		6		3	4	6			1204	1.91	Chitin synthase	Cytochrome b5-like heme/steroid binding domain, Chitin synthase, Nucleotide-diphospho-sugar transferases	GO:0004100|GO:0016758	KEGG: 00520+2.4.1.16|MetaCyc: PWY-6981			Cytochrome b5-like heme/steroid binding domain	Nucleotide-diphospho-sugar transferases		Chitin synthase
g532	1	1918901	1922014									1005	1.09	Protein kinase domain	Protein kinase domain, Serine/threonine-protein kinase, active site, Protein kinase, ATP binding site, First polo-box domain, POLO box domain superfamily, Protein kinase-like domain superfamily	GO:0004672|GO:0005524|GO:0006468|GO:0004672|GO:0006468|GO:0005524|GO:0005515		First polo-box domain	Protein kinase domain	Protein kinase domain	Protein kinase-like domain superfamily
g533	1	1922922	1923610		1		1	1				212		Optic atrophy 3 protein (OPA3)	Optic atrophy 3-like								Optic atrophy 3-like
g534	1	1924680	1925405	1		1	1			Effector	0.677	224	4.02
g535	1	1928102	1928552		4		2	3	3			132	0.76
g536	1	1930238	1930850									113		Shwachman-Bodian-Diamond syndrome (SBDS) protein	Ribosome maturation protein SBDS, N-terminal domain superfamily, Ribosome maturation protein SBDS, N-terminal, Ribosome maturation protein Sdo1/SBDS-like						Ribosome maturation protein SBDS, N-terminal domain superfamily		Ribosome maturation protein Sdo1/SBDS-like
g537	1	1931947	1935192									633	1.58	RhoGEF domain	Dbl homology (DH) domain, Dbl homology (DH) domain superfamily	GO:0005085			Dbl homology (DH) domain		Dbl homology (DH) domain superfamily
g538	1	1937619	1940791		8		4	5	9			997	1.4	Cation transporting ATPase, C-terminus, Cation transporter/ATPase, N-terminus, E1-E2 ATPase, haloacid dehalogenase-like hydrolase	HAD-like superfamily, P-type ATPase, Cation-transporting P-type ATPase, C-terminal, Cation-transporting P-type ATPase, N-terminal, P-type ATPase, transmembrane domain superfamily, P-type ATPase, subfamily IIA, SERCA-type, HAD superfamily, P-type ATPase, cytoplasmic domain N, P-type ATPase, phosphorylation site, P-type ATPase, A domain superfamily	GO:0016021|GO:0005388|GO:0006816|GO:0016021|GO:0000166	Reactome: R-HSA-936837, Reactome: R-HSA-1912420|Reactome: R-HSA-418359|Reactome: R-HSA-5578775|Reactome: R-HSA-936837			Cation-transporting P-type ATPase, N-terminal	HAD-like superfamily, P-type ATPase, transmembrane domain superfamily, P-type ATPase, cytoplasmic domain N, P-type ATPase, A domain superfamily	P-type ATPase, P-type ATPase, P-type ATPase, subfamily IIA, SERCA-type
g539	1	1941089	1942801									554	1.08	RTC4-like domain	Restriction of telomere capping protein 4, Restriction of telomere capping protein 4, C-terminal					Restriction of telomere capping protein 4, C-terminal			Restriction of telomere capping protein 4
g540	1	1943445	1945632									486	0.41	Dynamitin, Ribosomal protein S28e	Ribosomal protein S28e, Dynamitin, Ribosomal protein S28e conserved site, Nucleic acid-binding, OB-fold	GO:0003735|GO:0005840|GO:0006412|GO:0005869|GO:0007017	Reactome: R-HSA-156827|Reactome: R-HSA-156902|Reactome: R-HSA-1799339|Reactome: R-HSA-192823|Reactome: R-HSA-2408557|Reactome: R-HSA-6791226|Reactome: R-HSA-72649|Reactome: R-HSA-72689|Reactome: R-HSA-72695|Reactome: R-HSA-72702|Reactome: R-HSA-72706|Reactome: R-HSA-72764|Reactome: R-HSA-9010553|Reactome: R-HSA-9633012|Reactome: R-HSA-975956|Reactome: R-HSA-975957, Reactome: R-HSA-2132295|Reactom…	Ribosomal protein S28e			Nucleic acid-binding, OB-fold		Dynamitin
g541	1	1946448	1946738									96	1.04	ThiS family	Molybdopterin synthase sulfur carrier subunit, Beta-grasp domain superfamily, Sulfur carrier ThiS/MoaD-like, Molybdopterin synthase/thiamin biosynthesis sulphur carrier, beta-grasp	GO:0005829|GO:0006777	Reactome: R-HSA-947581				Molybdopterin synthase/thiamin biosynthesis sulphur carrier, beta-grasp
g542	1	1950421	1950765									78	1.28	Complex 1 protein (LYR family)	Complex 1 LYR protein
g543	1	1951929	1954133									717	3.35	IBR domain, a half RING-finger domain	IBR domain, E3 ubiquitin ligase RBR family	GO:0004842|GO:0016567				IBR domain, IBR domain			E3 ubiquitin ligase RBR family
g544	1	1954383	1955750									388	1.8	Dihydrouridine synthase (Dus)	tRNA-dihydrouridine synthase, conserved site, Aldolase-type TIM barrel, tRNA-dihydrouridine synthase, DUS-like, FMN-binding domain	GO:0008033|GO:0017150|GO:0050660|GO:0055114|GO:0003824		DUS-like, FMN-binding domain
g545	1	1955897	1958505									847	0.83	Exocyst complex component Sec10	Exocyst complex component EXOC5/Sec10, Exocyst complex component Sec10-like	GO:0000145|GO:0006887|GO:0005737|GO:0006887	Reactome: R-HSA-1445148|Reactome: R-HSA-264876|Reactome: R-HSA-5620916						Exocyst complex component EXOC5/Sec10, Exocyst complex component Sec10-like
g546	1	1959126	1960211		1		1	1	1			327	0.92		Decaprenyl diphosphate synthase-like superfamily, Dehydrodolichyl diphosphate synthase complex subunit Nus1	GO:0016765|GO:0019408|GO:1904423	Reactome: R-HSA-446199|Reactome: R-HSA-4755609, KEGG: 00900+2.5.1.87|MetaCyc: PWY-6129|Reactome: R-HSA-446199|Reactome: R-HSA-4755609				Decaprenyl diphosphate synthase-like superfamily		Dehydrodolichyl diphosphate synthase complex subunit Nus1
g547	1	1960281	1961370									325	0.92	2OG-Fe(II) oxygenase superfamily	Oxoglutarate/iron-dependent dioxygenase, Alpha-ketoglutarate-dependent dioxygenase AlkB-like, Alpha-ketoglutarate-dependent dioxygenase AlkB-like superfamily	GO:0016491|GO:0055114			Oxoglutarate/iron-dependent dioxygenase
g548	1	1961811	1963399									456	1.32	Met-10+ like-protein	S-adenosyl-L-methionine-dependent methyltransferase, SAM-dependent methyltransferase TRM5/TYW2-type, tRNA (guanine(37)-N(1))-methyltransferase, eukaryotic	GO:0009019|GO:0030488	Reactome: R-HSA-6782861, MetaCyc: PWY-6829|MetaCyc: PWY-7285|MetaCyc: PWY-7286|Reactome: R-HSA-6782861		SAM-dependent methyltransferase TRM5/TYW2-type		S-adenosyl-L-methionine-dependent methyltransferase
g549	1	1975810	1977620									584	0.51	Fungal protein of unknown function (DUF1752)	Nitrogen regulatory protein areA, GATA-like domain
g550	1	1979706	1982897									1046	0.76	RNB domain	Nucleic acid-binding, OB-fold, Ribonuclease II/R	GO:0003723|GO:0004540				Ribonuclease II/R	Nucleic acid-binding, OB-fold
g551	1	1985192	1987075	1		1	1			Non-effector	0.99	610	3.77		Glycoside hydrolase superfamily						Glycoside hydrolase superfamily
g552	1	1988965	1991429									804	1.49		WD40 repeat, conserved site, WD40-repeat-containing domain, WD40/YVTN repeat-like-containing domain superfamily, WD40 repeat, WD40-repeat-containing domain superfamily	GO:0005515			WD40-repeat-containing domain, WD40 repeat	WD40 repeat, WD40 repeat, WD40 repeat	WD40-repeat-containing domain superfamily
g553	1	1996331	2000422									969	1.14	TGS domain, Threonyl and Alanyl tRNA synthetase second additional domain, Anticodon binding domain, tRNA synthetase class II core domain (G, H, P, S and T)	TGS, Threonyl/alanyl tRNA synthetase, class II-like, putative editing domain superfamily, Threonyl/alanyl tRNA synthetase, SAD, Aminoacyl-tRNA synthetase, class II, Anticodon-binding domain superfamily, Threonine-tRNA ligase, class IIa, Beta-grasp domain superfamily, Threonine-tRNA ligase catalytic core domain, Anticodon-binding, TGS-like, Aminoacyl-tRNA synthetase, class II (G/ P/ S/T)	GO:0000166|GO:0004812|GO:0005524|GO:0043039|GO:0004829|GO:0005524|GO:0005737|GO:0006435|GO:0000166|GO:0004812|GO:0005524|GO:0006418	KEGG: 00970+6.1.1.3	Threonine-tRNA ligase catalytic core domain	Aminoacyl-tRNA synthetase, class II	Threonyl/alanyl tRNA synthetase, SAD	Threonyl/alanyl tRNA synthetase, class II-like, putative editing domain superfamily, TGS-like	Threonine-tRNA ligase, class IIa	Threonine-tRNA ligase, class IIa
g554	1	2000714	2001182		1	1	1	1	1			103
g555	1	2001607	2003238	1		1	1			Non-effector	0.99	505	1.39	Thioredoxin, Thioredoxin, Thioredoxin-like domain	Thioredoxin-like superfamily, Protein disulphide isomerase, Disulphide isomerase, Thioredoxin domain, Thioredoxin, conserved site	GO:0003756|GO:0045454			Thioredoxin domain, Thioredoxin domain		Thioredoxin-like superfamily, Thioredoxin-like superfamily, Thioredoxin-like superfamily, Thioredoxin-like superfamily	Protein disulphide isomerase, Disulphide isomerase, Disulphide isomerase
g556	1	2005049	2006399									413	0.24	NADH:flavin oxidoreductase / NADH oxidase family	NADH:flavin oxidoreductase/NADH oxidase, N-terminal, Aldolase-type TIM barrel	GO:0010181|GO:0016491|GO:0055114|GO:0003824
g557	1	2007869	2009419									408	0.98	Peroxidase	Peroxidases heam-ligand binding site, Peroxidase, active site, Class I peroxidase, Haem peroxidase, Haem peroxidase superfamily	GO:0004601|GO:0055114|GO:0004601|GO:0006979|GO:0020037|GO:0055114	Reactome: R-HSA-2408557		Haem peroxidase		Haem peroxidase superfamily
g558	1	2011032	2013361									587	1.19		Tetratricopeptide-like helical domain superfamily, HAT (Half-A-TPR) repeat	GO:0005515|GO:0006396				HAT (Half-A-TPR) repeat, HAT (Half-A-TPR) repeat, HAT (Half-A-TPR) repeat, HAT (Half-A-TPR) repeat, HAT (Half-A-TPR) repeat, HAT (Half-A-TPR) repeat, HAT (Half-A-TPR) repeat	Tetratricopeptide-like helical domain superfamily
g559	1	2014884	2019005									1321	0.91	SacI homology domain, Endonuclease/Exonuclease/phosphatase family	SAC domain, Endonuclease/exonuclease/phosphatase superfamily, Endonuclease/exonuclease/phosphatase, Inositol polyphosphate-related phosphatase	GO:0042578|GO:0046856			SAC domain	Inositol polyphosphate-related phosphatase	Endonuclease/exonuclease/phosphatase superfamily
g560	1	2020729	2021217									162
g561	1	2022385	2023966									275	1.09	14-3-3 protein	14-3-3 domain, 14-3-3 protein, 14-3-3 domain superfamily, 14-3-3 protein, conserved site		Reactome: R-HSA-111447|Reactome: R-HSA-1445148|Reactome: R-HSA-5625740|Reactome: R-HSA-5628897|Reactome: R-HSA-75035			14-3-3 domain	14-3-3 domain superfamily		14-3-3 protein
g562	1	2026706	2027923	1		1	1			Non-effector	0.925	405	2.72	Lipase (class 3)	Alpha/Beta hydrolase fold, Fungal lipase-like domain	GO:0006629	Reactome: R-HSA-426048				Alpha/Beta hydrolase fold
g563	1	2028688	2029260	1		1	1			Effector	0.628	171	3.51
g564	1	2030517	2031219									105		Ribosomal protein L36e	Ribosomal protein L36e, Ribosomal protein L36e domain superfamily	GO:0003735|GO:0005840|GO:0006412	Reactome: R-HSA-156827|Reactome: R-HSA-156902|Reactome: R-HSA-1799339|Reactome: R-HSA-192823|Reactome: R-HSA-2408557|Reactome: R-HSA-6791226|Reactome: R-HSA-72689|Reactome: R-HSA-72706|Reactome: R-HSA-72764|Reactome: R-HSA-9010553|Reactome: R-HSA-9633012|Reactome: R-HSA-975956|Reactome: R-HSA-975957						Ribosomal protein L36e
g565	1	2031588	2033176									507	0.2	TUG ubiquitin-like domain	TUG ubiquitin-like domain, Ubiquitin-like domain superfamily		Reactome: R-HSA-1445148				Ubiquitin-like domain superfamily, Ubiquitin-like domain superfamily
g566	1	2034200	2035036									205	2.93	Proteasome subunit	Nucleophile aminohydrolases, N-terminal, Proteasome beta-type subunit, conserved site, Proteasome beta 3 subunit, Proteasome, subunit alpha/beta, Proteasome B-type subunit	GO:0004175|GO:0005839|GO:0051603|GO:0019774|GO:0043161|GO:0004298|GO:0005839|GO:0051603|GO:0004298	Reactome: R-HSA-1169091|Reactome: R-HSA-1234176|Reactome: R-HSA-1236974|Reactome: R-HSA-1236978|Reactome: R-HSA-174084|Reactome: R-HSA-174113|Reactome: R-HSA-174154|Reactome: R-HSA-174178|Reactome: R-HSA-174184|Reactome: R-HSA-180534|Reactome: R-HSA-180585|Reactome: R-HSA-187577|Reactome: R-HSA-195253|Reactome: R-HSA-202424|Reactome: R-HSA-211733|Reactome: R-HSA-2467813|Reactome: R-HSA-2871837|Re…	Proteasome beta 3 subunit	Proteasome B-type subunit		Nucleophile aminohydrolases, N-terminal		Proteasome beta 3 subunit
g567	1	2035308	2037247									571	1.58	Maltogenic Amylase, C-terminal domain, Alpha amylase, catalytic domain	Maltogenic Amylase, C-terminal, Glycosyl hydrolase, family 13, catalytic domain, Glycoside hydrolase superfamily, Glycosyl hydrolase, all-beta	GO:0003824|GO:0005975				Glycosyl hydrolase, family 13, catalytic domain	Glycoside hydrolase superfamily
g568	1	2040890	2048064		1		1	1				2265	0.53	Protein phosphatase 2C, Adenylate and Guanylate cyclase catalytic domain, Adenylate cyclase G-alpha binding domain, Leucine rich repeat, Leucine rich repeat, Leucine rich repeat	PPM-type phosphatase domain, Leucine-rich repeat, Nucleotide cyclase, Ras-associating (RA) domain, Adenylyl cyclase class-3/4/guanylyl cyclase, Leucine-rich repeat domain superfamily, PPM-type phosphatase domain superfamily, Adenylate cyclase G-alpha binding, Leucine-rich repeat, typical subtype	GO:0003824|GO:0005515|GO:0007165|GO:0009190|GO:0035556|GO:0000287|GO:0004016|GO:0006171	KEGG: 04658+3.1.3.16|KEGG: 04660+3.1.3.16|KEGG: 05235+3.1.3.16, KEGG: 00230+4.6.1.1	PPM-type phosphatase domain	Leucine-rich repeat, Leucine-rich repeat, PPM-type phosphatase domain, Adenylyl cyclase class-3/4/guanylyl cyclase, Leucine-rich repeat, Leucine-rich repeat, Leucine-rich repeat, Leucine-rich repeat, Leucine-rich repeat, Ras-associating (RA) domain, Leucine-rich repeat, Leucine-rich repeat, Leucine-rich repeat, Leucine-rich repeat, Leucine-rich repeat, Leucine-rich repeat, Leucine-rich repeat, Le…	PPM-type phosphatase domain, Ras-associating (RA) domain, Adenylyl cyclase class-3/4/guanylyl cyclase, Leucine-rich repeat, typical subtype, Leucine-rich repeat, typical subtype, Leucine-rich repeat, typical subtype, Leucine-rich repeat, typical subtype, Leucine-rich repeat, typical subtype, Leucine-rich repeat, typical subtype, Leucine-rich repeat, typical subtype, Leucine-rich repeat, typical s…	Nucleotide cyclase, PPM-type phosphatase domain superfamily
g569	1	2048700	2050464	1	10	1	6	5	11			552	0.54	Alg9-like mannosyltransferase family	Dol-P-Man:Man(7)GlcNAc(2)-PP-Dol alpha-1,6-mannosyltransferase, GPI mannosyltransferase	GO:0005788|GO:0006488|GO:0052824|GO:0016757	KEGG: 00510+2.4.1.260|KEGG: 00513+2.4.1.260|Reactome: R-HSA-446193|Reactome: R-HSA-4720489						Dol-P-Man:Man(7)GlcNAc(2)-PP-Dol alpha-1,6-mannosyltransferase, GPI mannosyltransferase
g570	1	2050953	2051416	1		1	1		2			83	1.2	Yos1-like	Yos1-like								Yos1-like
g571	1	2052222	2054709									734	1.23	Ubiquitin carboxyl-terminal hydrolase	Ubiquitin specific protease, conserved site, Peptidase C19, ubiquitin carboxyl-terminal hydrolase, Papain-like cysteine peptidase superfamily, Ubiquitin specific protease domain	GO:0006511|GO:0036459|GO:0016579|GO:0036459			Ubiquitin specific protease domain		Papain-like cysteine peptidase superfamily
g572	1	2061994	2063792									415	1.2	Mitochondrial carrier protein, Mitochondrial carrier protein, Mitochondrial carrier protein	Mitochondrial substrate/solute carrier, Mitochondrial carrier domain superfamily				Mitochondrial substrate/solute carrier, Mitochondrial substrate/solute carrier, Mitochondrial substrate/solute carrier		Mitochondrial carrier domain superfamily
g573	1	2064481	2065085									168			CBS domain				CBS domain, CBS domain
g574	1	2065499	2066128									186	0.54		Calycin						Calycin
g575	1	2067868	2069156									375	0.8	NAD dependent epimerase/dehydratase family	NAD-dependent epimerase/dehydratase, NAD(P)-binding domain superfamily	GO:0003824					NAD(P)-binding domain superfamily
g576	1	2073810	2074786									282	0.71	F-actin capping protein, beta subunit	F-actin-capping protein subunit alpha/beta, domain 2, F-actin-capping protein subunit alpha/beta, F-actin-capping protein subunit beta, N-terminal domain, F-actin-capping protein subunit beta, F-actin capping protein, beta subunit, conserved site	GO:0008290|GO:0051016|GO:0003779|GO:0005737|GO:0008290|GO:0030036	Reactome: R-HSA-2132295|Reactome: R-HSA-3371497|Reactome: R-HSA-6807878|Reactome: R-HSA-6811436, Reactome: R-HSA-2132295|Reactome: R-HSA-3371497|Reactome: R-HSA-6807878|Reactome: R-HSA-6811436|Reactome: R-HSA-983231				F-actin-capping protein subunit alpha/beta		F-actin-capping protein subunit beta
g577	1	2075906	2077357									426	2.11		Bromo adjacent homology (BAH) domain, Bromo adjacent homology (BAH) domain superfamily, Zinc finger, FYVE/PHD-type, Zinc finger, RING/FYVE/PHD-type	GO:0003682			Bromo adjacent homology (BAH) domain	Bromo adjacent homology (BAH) domain	Zinc finger, FYVE/PHD-type
g578	1	2078337	2080380		12		6	7	12			653	1.38	Vacuole effluxer Atg22 like	Autophagy-related protein 22-like, MFS transporter superfamily						MFS transporter superfamily
g579	1	2081720	2082214									127		Protein of unknown function (DUF3602)	Protein of unknown function DUF3602
g580	1	2084832	2085924									316	3.8	CS domain, CHORD, CHORD	CS domain, CHORD domain, HSP20-like chaperone				CS domain, CHORD domain, CHORD domain		HSP20-like chaperone
g581	1	2086661	2087677									268	0.75	HpcH/HpaI aldolase/citrate lyase family	Pyruvate/Phosphoenolpyruvate kinase-like domain superfamily, HpcH/HpaI aldolase/citrate lyase domain, Pyruvate kinase-like domain superfamily	GO:0003824					Pyruvate/Phosphoenolpyruvate kinase-like domain superfamily
g582	1	2088512	2089185									172	1.16	S1 RNA binding domain, SHS2 domain found in N terminus of Rpb7p/Rpc25p/MJ0397	S1 domain, RNA polymerase Rpb7-like , N-terminal, RNA polymerase Rpb7-like, N-terminal domain superfamily, Nucleic acid-binding, OB-fold	GO:0003676|GO:0006351					Nucleic acid-binding, OB-fold, RNA polymerase Rpb7-like, N-terminal domain superfamily
g583	1	2091183	2091896		5		3	3	4			188	2.13	Protein of unknown function (DUF962)	2-hydroxy-palmitic acid dioxygenase Mpo1-like								2-hydroxy-palmitic acid dioxygenase Mpo1-like
g584	1	2093862	2094792	1		1	1			Non-effector	0.809	285
g585	1	2097241	2101055									1175	0.85	Carbamoyl-phosphate synthase L chain, ATP binding domain, Carbamoyl-phosphate synthase L chain, ATP binding domain, Carbamoyl-phosphate synthetase large chain, oligomerisation domain	Methylglyoxal synthase-like domain superfamily, ATP-grasp fold, subdomain 1, ATP-grasp fold, Carbamoyl-phosphate synthetase large subunit-like, ATP-binding domain, Pre-ATP-grasp domain superfamily, Carbamoyl-phosphate synthetase, large subunit oligomerisation domain superfamily, Carbamoyl-phosphate synthase, large subunit, Carbamoyl-phosphate synthase large subunit, CPSase domain, Carbamoyl-phosp…	GO:0005524|GO:0005524|GO:0046872|GO:0006807	KEGG: 00240+6.3.5.5|KEGG: 00250+6.3.5.5|MetaCyc: PWY-5154|MetaCyc: PWY-5686|MetaCyc: PWY-7400|MetaCyc: PWY-7790|MetaCyc: PWY-7791		ATP-grasp fold, ATP-grasp fold	Carbamoyl-phosphate synthetase, large subunit oligomerisation domain	Methylglyoxal synthase-like domain superfamily, Pre-ATP-grasp domain superfamily, Carbamoyl-phosphate synthetase, large subunit oligomerisation domain superfamily, Pre-ATP-grasp domain superfamily	Carbamoyl-phosphate synthase, large subunit
g586	1	2102007	2104058									589	2.04	NPL4 family, NPL4 family, putative zinc binding region	Nuclear pore localisation protein NPL4, C-terminal, Nuclear protein localization protein 4, NPL4, zinc-binding putative, MPN domain, Ubiquitin-like domain superfamily	GO:0006511	Reactome: R-HSA-110320	Nuclear pore localisation protein NPL4, C-terminal	MPN domain		Ubiquitin-like domain superfamily
g587	1	2104706	2105483		1		1	1	1			222	0.45	Preprotein translocase subunit Sec66	Translocation protein Sec66	GO:0031204|GO:0031207							Translocation protein Sec66
g588	1	2105948	2106391									147	1.36
g589	1	2108117	2110524									701	0.86	Origin recognition complex winged helix C-terminal, Origin recognition complex (ORC) subunit 3 N-terminus	ORC3, winged helix C-terminal, Origin recognition complex, subunit 3	GO:0003677|GO:0005664|GO:0006260	Reactome: R-HSA-113507|Reactome: R-HSA-176187|Reactome: R-HSA-68616|Reactome: R-HSA-68689|Reactome: R-HSA-68827|Reactome: R-HSA-68867|Reactome: R-HSA-68949|Reactome: R-HSA-68962						Origin recognition complex, subunit 3
g590	1	2111298	2113378									576	0.17	PWWP domain	IOC4-like, PWWP domain, PWWP domain			IOC4-like, PWWP domain	PWWP domain	PWWP domain
g591	1	2114166	2120846									2209	0.54	Sec63 Brl domain, DEAD/DEAH box helicase, Helicase conserved C-terminal domain, N-terminal helicase PWI domain, DEAD/DEAH box helicase, Sec63 Brl domain	Winged helix DNA-binding domain superfamily, Sec63 domain, DEAD/DEAH box helicase domain, Helicase, C-terminal, C2 domain superfamily, Brr2, N-terminal helicase PWI domain, Immunoglobulin E-set, Helicase superfamily 1/2, ATP-binding domain, P-loop containing nucleoside triphosphate hydrolase	GO:0003676|GO:0005524	Reactome: R-HSA-72163|Reactome: R-HSA-72165		Helicase, C-terminal, Helicase superfamily 1/2, ATP-binding domain, Helicase superfamily 1/2, ATP-binding domain	Helicase superfamily 1/2, ATP-binding domain, Helicase superfamily 1/2, ATP-binding domain, Helicase, C-terminal, Helicase, C-terminal, Sec63 domain, Sec63 domain	Winged helix DNA-binding domain superfamily, Immunoglobulin E-set, P-loop containing nucleoside triphosphate hydrolase, P-loop containing nucleoside triphosphate hydrolase, P-loop containing nucleoside triphosphate hydrolase, P-loop containing nucleoside triphosphate hydrolase
g592	1	2121428	2122978									516	0.39
g593	1	2123090	2124395									382	1.31	Replication factor C C-terminal domain, ATPase family associated with various cellular activities (AAA)	AAA+ ATPase domain, Replication factor C, C-terminal, ATPase, AAA-type, core, P-loop containing nucleoside triphosphate hydrolase, DNA polymerase III, clamp loader complex, gamma/delta/delta subunit, C-terminal	GO:0005524|GO:0003677|GO:0006260	Reactome: R-HSA-110312|Reactome: R-HSA-110314|Reactome: R-HSA-110320|Reactome: R-HSA-174411|Reactome: R-HSA-176187|Reactome: R-HSA-5651801|Reactome: R-HSA-5655862|Reactome: R-HSA-5656121|Reactome: R-HSA-5656169|Reactome: R-HSA-5685938|Reactome: R-HSA-5685942|Reactome: R-HSA-5693607|Reactome: R-HSA-5693616|Reactome: R-HSA-5696397|Reactome: R-HSA-5696400|Reactome: R-HSA-6782135|Reactome: R-HSA-6782…			AAA+ ATPase domain	P-loop containing nucleoside triphosphate hydrolase, DNA polymerase III, clamp loader complex, gamma/delta/delta subunit, C-terminal
g594	1	2125723	2127539									447	1.79	Ubiquitin-conjugating enzyme, Ubiquitin-conjugating enzyme	Ubiquitin-conjugating enzyme/RWD-like, Ubiquitin-conjugating enzyme E2		Reactome: R-HSA-983168	Ubiquitin-conjugating enzyme E2	Ubiquitin-conjugating enzyme E2, Ubiquitin-conjugating enzyme E2		Ubiquitin-conjugating enzyme/RWD-like, Ubiquitin-conjugating enzyme/RWD-like
g595	1	2128184	2128954									256	0.39		ZZ-type zinc finger-containing protein 3		Reactome: R-HSA-3214847						ZZ-type zinc finger-containing protein 3
g596	1	2132056	2132562									168
g597	1	2133833	2135483		5		3	3	5			531	0.38	Region of unknown function (DUF2417)	Alpha/Beta hydrolase fold, Protein of unknown function DUF2417						Alpha/Beta hydrolase fold
g598	1	2138381	2142016									1154	2.77	LIM domain, LIM domain, RhoGAP domain	Zinc finger, LIM-type, Rho GTPase activation protein, Rho GTPase-activating protein domain	GO:0007165	Reactome: R-HSA-194840		Zinc finger, LIM-type, Rho GTPase-activating protein domain, Zinc finger, LIM-type, Zinc finger, LIM-type	Rho GTPase-activating protein domain, Zinc finger, LIM-type, Zinc finger, LIM-type, Zinc finger, LIM-type	Rho GTPase activation protein
g599	1	2143189	2144383									377	1.33	3-beta hydroxysteroid dehydrogenase/isomerase family	3-beta hydroxysteroid dehydrogenase/isomerase, NAD(P)-binding domain superfamily	GO:0003854|GO:0006694|GO:0016616|GO:0055114					NAD(P)-binding domain superfamily
g600	1	2146946	2147932									310	0.32	HMG (high mobility group) box	High mobility group box domain superfamily, High mobility group box domain				High mobility group box domain	High mobility group box domain, High mobility group box domain	High mobility group box domain superfamily, High mobility group box domain superfamily
g601	1	2148543	2149440									261	0.38	Proteasome subunit	Nucleophile aminohydrolases, N-terminal, Proteasome, subunit alpha/beta, Proteasome subunit beta 4, Proteasome beta-type subunit, conserved site, Proteasome B-type subunit	GO:0004298|GO:0005839|GO:0051603|GO:0004298|GO:0004175|GO:0005839|GO:0051603	Reactome: R-HSA-1169091|Reactome: R-HSA-1234176|Reactome: R-HSA-1236974|Reactome: R-HSA-1236978|Reactome: R-HSA-174084|Reactome: R-HSA-174113|Reactome: R-HSA-174154|Reactome: R-HSA-174178|Reactome: R-HSA-174184|Reactome: R-HSA-180534|Reactome: R-HSA-180585|Reactome: R-HSA-187577|Reactome: R-HSA-195253|Reactome: R-HSA-202424|Reactome: R-HSA-211733|Reactome: R-HSA-2467813|Reactome: R-HSA-2871837|Re…	Proteasome subunit beta 4	Proteasome B-type subunit		Nucleophile aminohydrolases, N-terminal		Proteasome subunit beta 4
g602	1	2150915	2153583									699	1.72	Glutamine amidotransferase domain, SIS domain, SIS domain	Glucosamine-fructose-6-phosphate aminotransferase, isomerising, GlmS/AgaS, SIS domain 1, GlmS/FrlB, SIS domain 2, Sugar isomerase (SIS), Nucleophile aminohydrolases, N-terminal, Glutamine amidotransferase type 2 domain	GO:0004360|GO:1901137|GO:0097367|GO:1901135	KEGG: 00250+2.6.1.16|KEGG: 00520+2.6.1.16|MetaCyc: PWY-6749|MetaCyc: PWY-8013|Reactome: R-HSA-446210	GlmS/AgaS, SIS domain 1, GlmS/FrlB, SIS domain 2	Sugar isomerase (SIS), Glutamine amidotransferase type 2 domain, Sugar isomerase (SIS)		Nucleophile aminohydrolases, N-terminal	Glucosamine-fructose-6-phosphate aminotransferase, isomerising
g603	1	2157137	2158495									391	0.51	Proteasomal ATPase OB C-terminal domain, AAA+ lid domain, ATPase family associated with various cellular activities (AAA)	Proteasomal ATPase OB C-terminal domain, 26S proteasome regulatory subunit P45-like, ATPase, AAA-type, conserved site, P-loop containing nucleoside triphosphate hydrolase, AAA+ ATPase domain, AAA ATPase, AAA+ lid domain, ATPase, AAA-type, core	GO:0005737|GO:0016787|GO:0030163|GO:0005524	Reactome: R-HSA-1169091|Reactome: R-HSA-1234176|Reactome: R-HSA-1236974|Reactome: R-HSA-1236978|Reactome: R-HSA-174084|Reactome: R-HSA-174113|Reactome: R-HSA-174154|Reactome: R-HSA-174178|Reactome: R-HSA-174184|Reactome: R-HSA-180534|Reactome: R-HSA-180585|Reactome: R-HSA-187577|Reactome: R-HSA-195253|Reactome: R-HSA-202424|Reactome: R-HSA-211733|Reactome: R-HSA-2467813|Reactome: R-HSA-2871837|Re…			AAA+ ATPase domain	P-loop containing nucleoside triphosphate hydrolase	26S proteasome regulatory subunit P45-like
g604	1	2159895	2160473									192		Mago binding	Partner of Y14 and mago, WIBG, N-terminal domain superfamily, WIBG, Mago-binding	GO:1903259				WIBG, Mago-binding	WIBG, N-terminal domain superfamily		Partner of Y14 and mago
g605	1	2162419	2166127		9		5	5	9			1167	1.11	Cation transporting ATPase, C-terminus, Cation transport ATPase (P-type), E1-E2 ATPase, Cation transporter/ATPase, N-terminus	P-type ATPase, A domain superfamily, HAD-like superfamily, Cation-transporting P-type ATPase, C-terminal, P-type ATPase, subfamily IIB, HAD superfamily, P-type ATPase, P-type ATPase, transmembrane domain superfamily, P-type ATPase, cytoplasmic domain N, P-type ATPase, phosphorylation site, Cation-transporting P-type ATPase, N-terminal	GO:0005388|GO:0005524|GO:0016020|GO:0070588|GO:0016021|GO:0000166	Reactome: R-HSA-936837, Reactome: R-HSA-418359|Reactome: R-HSA-5578775|Reactome: R-HSA-936837				P-type ATPase, A domain superfamily, HAD-like superfamily, P-type ATPase, transmembrane domain superfamily, P-type ATPase, cytoplasmic domain N	P-type ATPase, subfamily IIB, P-type ATPase, P-type ATPase
g606	1	2166579	2167025		1		1	1	1			66		Ubiquinol-cytochrome C reductase, UQCRX/QCR9 like	Cytochrome b-c1 complex subunit 9, Cytochrome b-c1 complex subunit 9 superfamily	GO:0005743|GO:0005750|GO:0006122	Reactome: R-HSA-611105				Cytochrome b-c1 complex subunit 9 superfamily		Cytochrome b-c1 complex subunit 9
g607	1	2167872	2174432									2169	2.31	ATP-dependent Clp protease adaptor protein ClpS, Putative zinc finger in N-recognin (UBR box)	Adaptor protein ClpS, core, E3 ubiquitin-protein ligase UBR1-like, Zinc finger, UBR-type, Winged helix DNA-binding domain superfamily	GO:0030163|GO:0061630|GO:0071596|GO:0008270	Reactome: R-HSA-983168, MetaCyc: PWY-7511		Zinc finger, UBR-type	Zinc finger, UBR-type	Winged helix DNA-binding domain superfamily		E3 ubiquitin-protein ligase UBR1-like
g608	1	2175166	2177071									522	0.77	Chromatin remodelling complex Rsc7/Swp82 subunit	Chromatin-remodelling complex, RSC SWI/SNF subunit Rsc7/Swp82
g609	1	2185729	2186730									333	1.2	Cyclin	Cyclin PHO80-like	GO:0000079|GO:0019901
g610	1	2188602	2189351									233		N-terminal domain of NEFA-interacting nuclear protein NIP30	FAM192A/Fyv6, N-terminal, PSME3-interacting protein								PSME3-interacting protein
g611	1	2189652	2191031		1		1	1				459	0.22	Inner membrane protein import complex subunit Tim54	Mitochondrial import inner membrane translocase subunit Tim54
g612	1	2193284	2195394									642	0.78	Protein kinase domain	Protein kinase-like domain superfamily, AGC-kinase, C-terminal, Protein kinase domain, Protein kinase, ATP binding site, Serine/threonine-protein kinase, active site	GO:0004674|GO:0005524|GO:0006468|GO:0004672|GO:0005524|GO:0006468|GO:0005524|GO:0004672|GO:0006468			Protein kinase domain, AGC-kinase, C-terminal	AGC-kinase, C-terminal, Protein kinase domain	Protein kinase-like domain superfamily
g613	1	2196101	2196823									240	0.83	Zinc-finger of C2H2 type, Pre-mRNA-splicing factor SF3a complex subunit 2 (Prp11)	Matrin/U1-C-like, C2H2-type zinc finger, SF3A2 domain, Zinc finger C2H2 superfamily, Matrin/U1-C, C2H2-type zinc finger	GO:0003676|GO:0008270|GO:0003676|GO:0005634|GO:0008270	Reactome: R-HSA-72163		Matrin/U1-C, C2H2-type zinc finger	Matrin/U1-C-like, C2H2-type zinc finger	Zinc finger C2H2 superfamily
g614	1	2197125	2198535									436	0.69	Aminotransferase class-III	Pyridoxal phosphate-dependent transferase, Aminotransferase class-III, Pyridoxal phosphate-dependent transferase, major domain, Pyridoxal phosphate-dependent transferase domain 1	GO:0008483|GO:0030170|GO:0003824					Pyridoxal phosphate-dependent transferase
g615	1	2199287	2200984									544	0.18	GNL3L/Grn1 putative GTPase, 50S ribosome-binding GTPase	GTP-binding protein, orthogonal bundle domain superfamily, GTP binding domain, Guanine nucleotide-binding protein-like 3, N-terminal domain, P-loop containing nucleoside triphosphate hydrolase, Circularly permuted (CP)-type guanine nucleotide-binding (G) domain	GO:0005525	Reactome: R-HSA-6791226		Circularly permuted (CP)-type guanine nucleotide-binding (G) domain		P-loop containing nucleoside triphosphate hydrolase
g616	1	2201219	2204222									983	1.12	Rrp44-like cold shock domain, Dis3-like cold-shock domain 2 (CSD2), RNB domain, PIN domain, S1 domain	Nucleic acid-binding, OB-fold, Rrp44-like cold shock domain, Dis3-like cold-shock domain 2, Ribonuclease II/R, Ribonuclease II/R, conserved site, PIN domain, Exosome complex exonuclease RRP44, S1 domain, PIN-like domain superfamily	GO:0003723|GO:0004540				Ribonuclease II/R, PIN domain	Nucleic acid-binding, OB-fold, Nucleic acid-binding, OB-fold, PIN-like domain superfamily, Nucleic acid-binding, OB-fold, Nucleic acid-binding, OB-fold
g617	1	2213313	2215672									596	0.34	Chromatin remodelling complex Rsc7/Swp82 subunit	Chromatin-remodelling complex, RSC SWI/SNF subunit Rsc7/Swp82
g618	1	2217107	2218259									305		Histone-like transcription factor (CBF/NF-Y) and archaeal histone	Transcription factor CBF/NF-Y/archaeal histone domain, Histone-fold	GO:0046982					Histone-fold
g619	1	2219854	2220984		1		1	1	1			302	0.33
g620	1	2230768	2231838									356	2.25
g621	1	2233202	2233928	1		1	1			Non-effector	0.795	202	4.95
g622	1	2238025	2239705									541	3.14
g623	1	2240029	2241297									422	0.47	Cys/Met metabolism PLP-dependent enzyme	Pyridoxal phosphate-dependent transferase, Cys/Met metabolism, pyridoxal phosphate-dependent enzyme, Pyridoxal phosphate-dependent transferase domain 1, Pyridoxal phosphate-dependent transferase, major domain	GO:0019346|GO:0030170|GO:0003824	Reactome: R-HSA-1614558|Reactome: R-HSA-1614603|Reactome: R-HSA-2408508	Cys/Met metabolism, pyridoxal phosphate-dependent enzyme			Pyridoxal phosphate-dependent transferase		Cys/Met metabolism, pyridoxal phosphate-dependent enzyme
g624	1	2245502	2247152									491	1.43	Fungal Zn(2)-Cys(6) binuclear cluster domain, Fungal specific transcription factor domain	Zn(2)-C6 fungal-type DNA-binding domain, Zn(2)-C6 fungal-type DNA-binding domain superfamily, Fungal transcription factor	GO:0000981|GO:0006355|GO:0008270|GO:0042025		Zn(2)-C6 fungal-type DNA-binding domain	Zn(2)-C6 fungal-type DNA-binding domain	Zn(2)-C6 fungal-type DNA-binding domain	Zn(2)-C6 fungal-type DNA-binding domain superfamily
g625	1	2248077	2249087									317	0.63	Brix domain	Brix domain, Ribosome biogenesis protein Rpf2	GO:0000027|GO:0000470|GO:0019843			Brix domain	Brix domain			Ribosome biogenesis protein Rpf2
g626	1	2249591	2251566									619	0.81	Tetratricopeptide repeat, Tetratricopeptide repeat	Tetratricopeptide repeat, Tetratricopeptide repeat 1, Tetratricopeptide-like helical domain superfamily, Tetratricopeptide repeat-containing domain, Peroxisomal targeting signal 1 receptor family	GO:0005515			Tetratricopeptide repeat, Tetratricopeptide repeat, Tetratricopeptide repeat-containing domain, Tetratricopeptide repeat, Tetratricopeptide repeat	Tetratricopeptide repeat, Tetratricopeptide repeat, Tetratricopeptide repeat, Tetratricopeptide repeat	Tetratricopeptide-like helical domain superfamily		Peroxisomal targeting signal 1 receptor family
g627	1	2259630	2261223									492		Helix-loop-helix DNA-binding domain	Helix-loop-helix DNA-binding domain superfamily, Myc-type, basic helix-loop-helix (bHLH) domain	GO:0046983		Myc-type, basic helix-loop-helix (bHLH) domain	Myc-type, basic helix-loop-helix (bHLH) domain	Myc-type, basic helix-loop-helix (bHLH) domain	Helix-loop-helix DNA-binding domain superfamily
g628	1	2262690	2264194									451	2.44	Fungal Zn(2)-Cys(6) binuclear cluster domain	Zn(2)-C6 fungal-type DNA-binding domain, Zn(2)-C6 fungal-type DNA-binding domain superfamily	GO:0000981|GO:0006355|GO:0008270|GO:0042025		Zn(2)-C6 fungal-type DNA-binding domain	Zn(2)-C6 fungal-type DNA-binding domain	Zn(2)-C6 fungal-type DNA-binding domain	Zn(2)-C6 fungal-type DNA-binding domain superfamily
g629	1	2264396	2265572									375	0.27	Alcohol dehydrogenase GroES-like domain, Zinc-binding dehydrogenase	NAD(P)-binding domain superfamily, Polyketide synthase, enoylreductase domain, Alcohol dehydrogenase, N-terminal, GroES-like superfamily, Alcohol dehydrogenase, C-terminal	GO:0016491|GO:0055114				Polyketide synthase, enoylreductase domain	NAD(P)-binding domain superfamily, GroES-like superfamily
g630	1	2266282	2267656									210	2.38
g631	1	2268815	2269717		1		1	1	1			282	0.35	Glutaredoxin	Glutaredoxin, Glutaredoxin subgroup, Glutaredoxin, eukaryotic/virial, Thioredoxin-like superfamily	GO:0009055|GO:0015035|GO:0045454			Glutaredoxin		Thioredoxin-like superfamily	Glutaredoxin, eukaryotic/virial
g632	1	2271816	2273066	1		1	1		1			416	1.68	Nucleotide exchange factor SIL1	Armadillo-like helical, Nucleotide exchange factor Sil1, fungi	GO:0000774|GO:0005783
g633	1	2273430	2275121									530	3.21	MYND finger, SET domain	SET domain, Zinc finger, MYND-type	GO:0005515			SET domain, Zinc finger, MYND-type	SET domain
g634	1	2275535	2277688									717	0.98	Exonuclease	Ribonuclease H-like superfamily, Exonuclease, RNase T/DNA polymerase III, RNA exonuclease 1-like, exonuclease domain, Ribonuclease H superfamily	GO:0003676		RNA exonuclease 1-like, exonuclease domain		Exonuclease, RNase T/DNA polymerase III	Ribonuclease H-like superfamily
g635	1	2278526	2281926		8		4	5	8			1110	0.81	Transient receptor potential (TRP) ion channel, ML-like domain	ML-like domain, Transient receptor potential channel Flc/Pkd2-like, TRP, C-terminal					ML-like domain			Transient receptor potential channel Flc/Pkd2-like
g636	1	2286420	2288741			1	1					773	0.65	DNA mismatch repair protein, C-terminal domain, Histidine kinase-, DNA gyrase B-, and HSP90-like ATPase	DNA mismatch repair protein MutL/Mlh/Pms, Ribosomal protein S5 domain 2-type fold, Histidine kinase/HSP90-like ATPase superfamily, DNA mismatch repair, conserved site, Ribosomal protein S5 domain 2-type fold, subgroup, DNA mismatch repair protein, S5 domain 2-like	GO:0006298|GO:0016887|GO:0032300|GO:0005524|GO:0006298|GO:0030983				DNA mismatch repair protein, S5 domain 2-like	Ribosomal protein S5 domain 2-type fold, Histidine kinase/HSP90-like ATPase superfamily		DNA mismatch repair protein MutL/Mlh/Pms
g637	1	2289411	2290062									196	1.02	6,7-dimethyl-8-ribityllumazine synthase	Lumazine/riboflavin synthase superfamily, Lumazine synthase, Lumazine/riboflavin synthase	GO:0009231|GO:0009349|GO:0000906|GO:0009231	KEGG: 00740+2.5.1.78|MetaCyc: PWY-6167|MetaCyc: PWY-6168	Lumazine synthase			Lumazine/riboflavin synthase superfamily	Lumazine synthase	Lumazine synthase
g638	1	2290445	2293313									908
g639	1	2300238	2302243		5		3	3	5			588	0.68	Cation efflux family, Dimerisation domain of Zinc Transporter	Cation efflux protein, cytoplasmic domain superfamily, Cation efflux transmembrane domain superfamily, Cation efflux protein, Cation efflux protein, cytoplasmic domain	GO:0006812|GO:0008324|GO:0016021|GO:0055085	Reactome: R-HSA-435368				Cation efflux protein, cytoplasmic domain superfamily, Cation efflux transmembrane domain superfamily
g640	1	2302593	2308547									1935	1.29	Phosphatidylinositol 3- and 4-kinase, Phosphoinositide 3-kinase family, accessory domain (PIK domain)	Armadillo-type fold, Phosphatidylinositol 3/4-kinase, conserved site, Phosphatidylinositol 3-/4-kinase, catalytic domain, Phosphatidylinositol 3-/4-kinase, catalytic domain superfamily, Phosphoinositide 3-kinase, accessory (PIK) domain, Phosphatidylinositol kinase, Protein kinase-like domain superfamily, Phosphoinositide 3-kinase, accessory (PIK) domain superfamily	GO:0016301|GO:0046854|GO:0048015			Phosphoinositide 3-kinase, accessory (PIK) domain, Phosphatidylinositol 3-/4-kinase, catalytic domain	Phosphatidylinositol 3-/4-kinase, catalytic domain, Phosphoinositide 3-kinase, accessory (PIK) domain	Armadillo-type fold, Armadillo-type fold, Protein kinase-like domain superfamily		Phosphatidylinositol kinase
g641	1	2308908	2309753									264	1.14	Proteasome subunit	Proteasome subunit beta 1, Proteasome, subunit alpha/beta, Nucleophile aminohydrolases, N-terminal, Proteasome B-type subunit	GO:0004298|GO:0005839|GO:0051603|GO:0004298	Reactome: R-HSA-1169091|Reactome: R-HSA-1234176|Reactome: R-HSA-1236974|Reactome: R-HSA-1236978|Reactome: R-HSA-174084|Reactome: R-HSA-174113|Reactome: R-HSA-174154|Reactome: R-HSA-174178|Reactome: R-HSA-174184|Reactome: R-HSA-180534|Reactome: R-HSA-180585|Reactome: R-HSA-187577|Reactome: R-HSA-195253|Reactome: R-HSA-202424|Reactome: R-HSA-211733|Reactome: R-HSA-2467813|Reactome: R-HSA-2871837|Re…		Proteasome B-type subunit		Nucleophile aminohydrolases, N-terminal		Proteasome subunit beta 1
g642	1	2316207	2319936									659	0.46	YT521-B-like domain	RNA recognition motif domain, YTH domain, Nucleotide-binding alpha-beta plait domain superfamily, RNA-binding domain superfamily	GO:0003676|GO:0003723			YTH domain	RNA recognition motif domain	RNA-binding domain superfamily
g643	1	2323424	2324068									214		Hsp20/alpha crystallin family	Alpha crystallin/Hsp20 domain, HSP20-like chaperone				Alpha crystallin/Hsp20 domain		HSP20-like chaperone
g644	1	2325038	2326192									348	1.72	Rad51	DNA recombination and repair protein, RecA-like, DNA recombination and repair protein Rad51-like, C-terminal, DNA recombination and repair protein RecA, monomer-monomer interface, AAA+ ATPase domain, DNA recombination/repair protein Rad51, Rad51/DMC1/RadA, DNA recombination and repair protein RecA-like, ATP-binding domain, P-loop containing nucleoside triphosphate hydrolase, DNA repair Rad51/tran…	GO:0003677|GO:0005524|GO:0006259|GO:0008094|GO:0000150|GO:0000724|GO:0003690|GO:0003697|GO:0008094|GO:1990426|GO:0003677|GO:0003677|GO:0005524|GO:0006281|GO:0008094|GO:0000166	Reactome: R-HSA-5685942|Reactome: R-HSA-5693554|Reactome: R-HSA-5693568|Reactome: R-HSA-5693579, Reactome: R-HSA-5685938|Reactome: R-HSA-5685942|Reactome: R-HSA-5693554|Reactome: R-HSA-5693568|Reactome: R-HSA-5693579|Reactome: R-HSA-5693616|Reactome: R-HSA-8953750|Reactome: R-HSA-912446, Reactome: R-HSA-912446	Rad51/DMC1/RadA	DNA recombination and repair protein RecA, monomer-monomer interface, DNA recombination and repair protein RecA-like, ATP-binding domain	AAA+ ATPase domain	P-loop containing nucleoside triphosphate hydrolase, DNA repair Rad51/transcription factor NusA, alpha-helical	DNA recombination/repair protein Rad51
g645	1	2326655	2330245									1162	1.55	Nucleoporin Nup120/160	Nucleoporin Nup120/160		Reactome: R-HSA-1169408|Reactome: R-HSA-141444|Reactome: R-HSA-159227|Reactome: R-HSA-159230|Reactome: R-HSA-159231|Reactome: R-HSA-159236|Reactome: R-HSA-165054|Reactome: R-HSA-168271|Reactome: R-HSA-168276|Reactome: R-HSA-168325|Reactome: R-HSA-168333|Reactome: R-HSA-170822|Reactome: R-HSA-180746|Reactome: R-HSA-180910|Reactome: R-HSA-191859|Reactome: R-HSA-2467813|Reactome: R-HSA-2500257|React…						Nucleoporin Nup120/160
g646	1	2330514	2331621									321	0.31	Vacuolar protein sorting-associated protein 26	Arrestin, C-terminal, Vacuolar protein sorting protein 26 related	GO:0006886							Vacuolar protein sorting protein 26 related
g647	1	2332187	2333059									193	0.52	Ribosomal protein L6, Ribosomal protein L6	Ribosomal protein L6, Ribosomal protein L6, alpha-beta domain, Ribosomal protein L6, alpha-beta domain superfamily, Ribosomal protein L6, conserved site-2	GO:0003735|GO:0005840|GO:0006412|GO:0019843|GO:0003735|GO:0005840|GO:0006412	Reactome: R-HSA-156827|Reactome: R-HSA-156902|Reactome: R-HSA-1799339|Reactome: R-HSA-192823|Reactome: R-HSA-2408557|Reactome: R-HSA-6791226|Reactome: R-HSA-72689|Reactome: R-HSA-72706|Reactome: R-HSA-72764|Reactome: R-HSA-9010553|Reactome: R-HSA-9633012|Reactome: R-HSA-975956|Reactome: R-HSA-975957				Ribosomal protein L6, alpha-beta domain superfamily, Ribosomal protein L6, alpha-beta domain superfamily		Ribosomal protein L6
g648	1	2333990	2335238	1	2	1	2	1	1			398	4.02
g649	1	2335574	2336363									87	2.3
g650	1	2336796	2338420									479	0.42	V-ATPase subunit H, V-ATPase subunit H	Armadillo-like helical, ATPase, V1 complex, subunit H, ATPase, V1 complex, subunit H, C-terminal, ATPase, V1 complex, subunit H, C-terminal domain superfamily, Armadillo-type fold	GO:0000221|GO:0046961|GO:1902600|GO:0000221|GO:1902600	Reactome: R-HSA-1222556|Reactome: R-HSA-167590|Reactome: R-HSA-182218|Reactome: R-HSA-77387|Reactome: R-HSA-917977|Reactome: R-HSA-9636467|Reactome: R-HSA-9639288|Reactome: R-HSA-983712				Armadillo-type fold		ATPase, V1 complex, subunit H
g651	1	2339107	2340426									439	0.68	Aminomethyltransferase folate-binding domain, Glycine cleavage T-protein C-terminal barrel domain	GTP-binding protein TrmE/Glycine cleavage system T protein, domain 1, Aminomethyltransferase, folate-binding domain, Glycine cleavage T-protein, C-terminal barrel domain, Glycine cleavage T-protein/YgfZ, C-terminal, Glycine cleavage system T protein, Aminomethyltransferase-like	GO:0005515|GO:0004047|GO:0006546	KEGG: 00260+2.1.2.10|KEGG: 00670+2.1.2.10, KEGG: 00260+2.1.2.10|KEGG: 00670+2.1.2.10|Reactome: R-HSA-6783984				Glycine cleavage T-protein/YgfZ, C-terminal	Glycine cleavage system T protein
g652	1	2343011	2345263	1		1	1			Non-effector	0.969	713	0.56		Endopolyphosphatase, Ppn1p-related, Metallo-dependent phosphatase-like	GO:0000298|GO:0005773|GO:0016021
g653	1	2345668	2348106		2		1	2	1			795	0.75	Kelch motif	Kelch-type beta propeller	GO:0005515					Kelch-type beta propeller
g654	1	2350730	2352554									539	1.86	Fungal Zn(2)-Cys(6) binuclear cluster domain	Zn(2)-C6 fungal-type DNA-binding domain, Zn(2)-C6 fungal-type DNA-binding domain superfamily	GO:0000981|GO:0006355|GO:0008270|GO:0042025		Zn(2)-C6 fungal-type DNA-binding domain	Zn(2)-C6 fungal-type DNA-binding domain	Zn(2)-C6 fungal-type DNA-binding domain	Zn(2)-C6 fungal-type DNA-binding domain superfamily
g655	1	2354362	2356138									575	2.09
g656	1	2356723	2357902									374	2.94		BTB/POZ domain	GO:0005515			BTB/POZ domain
g657	1	2358414	2359073									219	4.57	Glutathione-dependent formaldehyde-activating enzyme, Glutathione-dependent formaldehyde-activating enzyme	Glutathione-dependent formaldehyde-activating enzyme/centromere protein V, Mss4-like superfamily	GO:0016846	KEGG: 00680+4.4.1.22|MetaCyc: PWY-1801				Mss4-like superfamily, Mss4-like superfamily
g658	1	2359766	2363443									1209	1.16	Protein of unknown function (DUF1765)	Uncharacterised protein family UPF0592
g659	1	2369529	2372150									802	0.87
g660	1	2373638	2375426									576	0.52	Aldehyde dehydrogenase family	Delta-1-pyrroline-5-carboxylate dehydrogenase, Aldehyde dehydrogenase, cysteine active site, Aldehyde dehydrogenase, N-terminal, Aldehyde dehydrogenase, glutamic acid active site, Aldehyde/histidinol dehydrogenase, Aldehyde dehydrogenase, C-terminal, Aldehyde dehydrogenase domain	GO:0003842|GO:0010133|GO:0016491|GO:0055114|GO:0016491|GO:0016620|GO:0055114	KEGG: 00250+1.2.1.88|KEGG: 00330+1.2.1.88|MetaCyc: PWY-6853|Reactome: R-HSA-389661|Reactome: R-HSA-70688	Delta-1-pyrroline-5-carboxylate dehydrogenase			Aldehyde/histidinol dehydrogenase	Delta-1-pyrroline-5-carboxylate dehydrogenase
g661	1	2377195	2378479									407	0.49	Helix-loop-helix DNA-binding domain	Helix-loop-helix DNA-binding domain superfamily, Myc-type, basic helix-loop-helix (bHLH) domain	GO:0046983		Myc-type, basic helix-loop-helix (bHLH) domain	Myc-type, basic helix-loop-helix (bHLH) domain	Myc-type, basic helix-loop-helix (bHLH) domain	Helix-loop-helix DNA-binding domain superfamily
g662	1	2379126	2380172	1	7	1	4	4	7			312	2.56	Per1-like family	Per1-like	GO:0006506							Per1-like
g663	1	2381096	2383802									885	1.02	Protein kinase domain	Serine/threonine-protein kinase, active site, Protein kinase-like domain superfamily, Protein kinase domain, Protein kinase, ATP binding site, Protein kinase Mps1 family	GO:0004672|GO:0006468|GO:0004672|GO:0005524|GO:0006468|GO:0005524|GO:0004712|GO:0007093|GO:0051304			Protein kinase domain	Protein kinase domain	Protein kinase-like domain superfamily		Protein kinase Mps1 family
g664	1	2384263	2384883			1	1					206	0.49	Ribosomal prokaryotic L21 protein	L21-like superfamily, Ribosomal protein L21-like	GO:0005840	Reactome: R-HSA-5368286|Reactome: R-HSA-5389840|Reactome: R-HSA-5419276				L21-like superfamily		Ribosomal protein L21-like
g665	1	2385159	2385994									260	0.38	Ribosomal protein S8e	Ribosomal biogenesis NSA2 family, Ribosomal protein S8e/ribosomal biogenesis NSA2			Ribosomal biogenesis NSA2 family					Ribosomal biogenesis NSA2 family
g666	1	2386916	2388359									345	1.16	Ribosomal protein L11 methyltransferase (PrmA)	S-adenosyl-L-methionine-dependent methyltransferase, Protein arginine N-methyltransferase	GO:0016274|GO:0018216			Protein arginine N-methyltransferase		S-adenosyl-L-methionine-dependent methyltransferase
g667	1	2388972	2391439			1	1					553	1.27	Phosphoglucomutase/phosphomannomutase, alpha/beta/alpha domain I, Phosphoglucomutase/phosphomannomutase, alpha/beta/alpha domain I, Phosphoglucomutase/phosphomannomutase, C-terminal domain	Alpha-D-phosphohexomutase, alpha/beta/alpha I/II/III, Alpha-D-phosphohexomutase, conserved site, Phosphoacetylglucosamine mutase, Alpha-D-phosphohexomutase, alpha/beta/alpha domain I, Alpha-D-phosphohexomutase, C-terminal, Alpha-D-phosphohexomutase, C-terminal domain superfamily	GO:0005975|GO:0016868|GO:0000287|GO:0004610|GO:0016868|GO:0071704	KEGG: 00520+5.4.2.10|MetaCyc: PWY-6749, KEGG: 00520+5.4.2.3|MetaCyc: PWY-5514|MetaCyc: PWY-6906|Reactome: R-HSA-446210	Phosphoacetylglucosamine mutase			Alpha-D-phosphohexomutase, alpha/beta/alpha I/II/III, Alpha-D-phosphohexomutase, alpha/beta/alpha I/II/III, Alpha-D-phosphohexomutase, C-terminal domain superfamily, Alpha-D-phosphohexomutase, alpha/beta/alpha I/II/III
g668	1	2391520	2393265									581	1.2	ERCC4 domain	DNA polymerase lambda lyase domain superfamily, Winged helix-like DNA-binding domain superfamily, ERCC4 domain, Restriction endonuclease type II-like	GO:0003677|GO:0004518	Reactome: R-HSA-6783310			ERCC4 domain	DNA polymerase lambda lyase domain superfamily, Restriction endonuclease type II-like
g669	1	2393493	2394249									234	0.85	Lumazine binding domain, Lumazine binding domain	Riboflavin synthase-like beta-barrel, ATP synthase subunit alpha, N-terminal domain-like superfamily, Lumazine-binding domain, Lumazine-binding protein		KEGG: 00190+7.1.2.2|KEGG: 00195+7.1.2.2|MetaCyc: PWY-7980, KEGG: 00740+2.5.1.9|MetaCyc: PWY-6167|MetaCyc: PWY-6168	Lumazine-binding protein	Lumazine-binding domain, Lumazine-binding domain		Riboflavin synthase-like beta-barrel, Riboflavin synthase-like beta-barrel	Lumazine-binding protein	Lumazine-binding protein
g670	1	2395090	2396211									373	1.07	Tetratricopeptide repeat	Tetratricopeptide repeat, Tetratricopeptide-like helical domain superfamily, Tetratricopeptide repeat-containing domain	GO:0005515			Tetratricopeptide repeat, Tetratricopeptide repeat-containing domain, Tetratricopeptide repeat		Tetratricopeptide-like helical domain superfamily
g671	1	2396511	2397250									227		RWD domain	RWD domain, Ubiquitin-conjugating enzyme/RWD-like, GIR2-like	GO:0005515			RWD domain	RWD domain	Ubiquitin-conjugating enzyme/RWD-like		GIR2-like
g672	1	2399329	2401437									683	0.29	CPL (NUC119) domain	Armadillo-type fold, Pumilio RNA-binding repeat, Pumilio homology domain, CPL domain, Pumilio homologue 3	GO:0003723			Pumilio homology domain	Pumilio RNA-binding repeat, Pumilio RNA-binding repeat, Pumilio RNA-binding repeat, Pumilio RNA-binding repeat	Armadillo-type fold		Pumilio homologue 3
g673	1	2402920	2404192		1		1	1	1			395	1.52
g674	1	2405072	2406930									586	1.02	Uncharacterized alpha/beta hydrolase domain (DUF2235)	Domain of unknown function DUF2235, Alpha/Beta hydrolase fold						Alpha/Beta hydrolase fold
g675	1	2407537	2408131									158	1.27	RNA polymerase Rpb4	HRDC-like superfamily, Rpb4/RPC9 superfamily, RNA polymerase Rpb4/RPC9, core, RNA polymerase subunit RPB4/RPC9	GO:0000166|GO:0003824|GO:0044237|GO:0006352|GO:0030880				RNA polymerase Rpb4/RPC9, core	HRDC-like superfamily
g676	1	2408527	2409306									187	1.07	Sybindin-like family	Trafficking protein particle complex subunit, Longin-like domain superfamily	GO:0016192|GO:0030008	Reactome: R-HSA-204005|Reactome: R-HSA-8876198			Trafficking protein particle complex subunit	Longin-like domain superfamily		Trafficking protein particle complex subunit
g677	1	2409445	2410368									289	0.69	von Willebrand factor type A domain	von Willebrand factor A-like domain superfamily, Proteasome subunit Rpn10, Ubiquitin interacting motif, von Willebrand factor, type A	GO:0006511|GO:0008540			Ubiquitin interacting motif, von Willebrand factor, type A	von Willebrand factor, type A	von Willebrand factor A-like domain superfamily		Proteasome subunit Rpn10
g678	1	2410798	2411979									361		Nbl1 / Borealin N terminal	Borealin, N-terminal		Reactome: R-HSA-141444|Reactome: R-HSA-2467813|Reactome: R-HSA-2500257|Reactome: R-HSA-4615885|Reactome: R-HSA-5663220|Reactome: R-HSA-68877|Reactome: R-HSA-9648025
g679	1	2412224	2413057									193	2.07	Translation initiation factor SUI1	SUI1 domain, SUI1 domain superfamily, DENR family, eukaryotes	GO:0003743|GO:0006413|GO:0003743			SUI1 domain		SUI1 domain superfamily	DENR family, eukaryotes
g680	1	2414738	2417701									987	1.32	Methyltransferase domain	Methyltransferase type 11, S-adenosyl-L-methionine-dependent methyltransferase	GO:0008168					S-adenosyl-L-methionine-dependent methyltransferase
g681	1	2418926	2419953		1		1	1	1			306	0.33	SPFH domain / Band 7 family	Prohibitin, Band 7/SPFH domain superfamily, Band 7 domain	GO:0016020	Reactome: R-HSA-8949664	Prohibitin		Band 7 domain	Band 7/SPFH domain superfamily		Prohibitin
g682	1	2420513	2420940									80		Ubiquitin family	Ubiquitin-like domain superfamily, Ubiquitin domain, Nedd8-like ubiquitin, Ubiquitin-like domain	GO:0005515	Reactome: R-HSA-2173789|Reactome: R-HSA-5689603|Reactome: R-HSA-8856825|Reactome: R-HSA-8951664|Reactome: R-HSA-917937	Nedd8-like ubiquitin	Ubiquitin-like domain	Ubiquitin-like domain	Ubiquitin-like domain superfamily
g683	1	2421512	2422660									382	0.26	RNA polymerase II transcription factor SIII (Elongin) subunit A	RNA polymerase II transcription factor SIII, subunit A	GO:0005634|GO:0006368|GO:0070449	Reactome: R-HSA-112382|Reactome: R-HSA-167152|Reactome: R-HSA-167200|Reactome: R-HSA-167238|Reactome: R-HSA-167243|Reactome: R-HSA-167246|Reactome: R-HSA-167287|Reactome: R-HSA-167290|Reactome: R-HSA-674695|Reactome: R-HSA-6796648|Reactome: R-HSA-75955
g684	1	2423633	2424900									369	0.81	TFIIF, beta subunit HTH domain, TFIIF, beta subunit N-terminus	TFIIF beta subunit, HTH domain, Winged helix DNA-binding domain superfamily, TFIIF, beta subunit, N-terminal, Winged helix-like DNA-binding domain superfamily, Transcription Factor IIF, Rap30/Rap74, interaction, Transcription initiation factor IIF, beta subunit	GO:0006367|GO:0005674|GO:0006366|GO:0006367	Reactome: R-HSA-112382|Reactome: R-HSA-113418|Reactome: R-HSA-167152|Reactome: R-HSA-167158|Reactome: R-HSA-167160|Reactome: R-HSA-167161|Reactome: R-HSA-167162|Reactome: R-HSA-167172|Reactome: R-HSA-167200|Reactome: R-HSA-167238|Reactome: R-HSA-167242|Reactome: R-HSA-167243|Reactome: R-HSA-167246|Reactome: R-HSA-167287|Reactome: R-HSA-167290|Reactome: R-HSA-168325|Reactome: R-HSA-674695|Reactome…				Winged helix DNA-binding domain superfamily, Transcription Factor IIF, Rap30/Rap74, interaction		Transcription initiation factor IIF, beta subunit
g685	1	2428309	2430400		2		1	2	1			634	1.1
g686	1	2432788	2435073	1		1	1			Non-effector	0.973	707	0.14	Glycosyl hydrolases family 18	Glycosyl hydrolases family 18 (GH18) active site, Chitinase insertion domain superfamily, Glycoside hydrolase family 18, catalytic domain, Glycoside hydrolase superfamily, Chitinase II	GO:0004553|GO:0005975|GO:0005975|GO:0008061	KEGG: 00520+3.2.1.14|MetaCyc: PWY-6855|MetaCyc: PWY-6902|MetaCyc: PWY-7822			Chitinase II	Chitinase insertion domain superfamily, Glycoside hydrolase superfamily
g687	1	2435984	2438210									703	0.14	Fungal domain of unknown function (DUF1750)	Protein of unknown function DUF1750, fungi
g688	1	2439027	2440955									492	1.22	6-phosphogluconate dehydrogenase, C-terminal domain, NAD binding domain of 6-phosphogluconate dehydrogenase	6-phosphogluconate dehydrogenase, C-terminal, 6-phosphogluconate dehydrogenase, 6-phosphogluconate dehydrogenase, decarboxylating, 6-phosphogluconate dehydrogenase-like, C-terminal domain superfamily, NAD(P)-binding domain superfamily, 6-phosphogluconate dehydrogenase, NADP-binding, 6-phosphogluconate dehydrogenase, domain 2, 6-phosphogluconate-binding site	GO:0004616|GO:0006098|GO:0055114|GO:0004616|GO:0055114|GO:0055114|GO:0050661|GO:0016491|GO:0055114	KEGG: 00030+1.1.1.44|KEGG: 00480+1.1.1.44|Reactome: R-HSA-71336			6-phosphogluconate dehydrogenase, C-terminal	6-phosphogluconate dehydrogenase-like, C-terminal domain superfamily, NAD(P)-binding domain superfamily	6-phosphogluconate dehydrogenase, decarboxylating	6-phosphogluconate dehydrogenase
g689	1	2443865	2444917									350		RNA recognition motif. (a.k.a. RRM, RBD, or RNP domain)	RBM42, RNA recognition motif, RNA-binding domain superfamily, RNA recognition motif domain, Nucleotide-binding alpha-beta plait domain superfamily	GO:0003676		RBM42, RNA recognition motif	RNA recognition motif domain	RNA recognition motif domain	RNA-binding domain superfamily
g690	1	2445477	2447456		8		4	5	9			605	0.83	Triose-phosphate Transporter family	Sugar phosphate transporter domain
g691	1	2450619	2453012									675	2.07	Glycosyl hydrolases family 15	Six-hairpin glycosidase superfamily, GH15-like domain, Six-hairpin glycosidase-like superfamily	GO:0003824	Reactome: R-HSA-70221				Six-hairpin glycosidase superfamily
g692	1	2457176	2459925									868	0.81	Arsenite-resistance protein 2, Domain of unknown function (DUF4187), Domain of unknown function (DUF3546)	Zinc finger C2H2-type, SERRATE/Ars2 , C-terminal, Domain of unknown function DUF4187, SERRATE/Ars2, N-terminal, G patch domain-containing protein 11		Reactome: R-HSA-6807505|Reactome: R-HSA-72163			Domain of unknown function DUF4187			G patch domain-containing protein 11
g693	1	2460724	2461920									361		G-patch domain	G-patch domain	GO:0003676			G-patch domain	G-patch domain
g694	1	2462456	2462784									71
g695	1	2464460	2466061									511		tRNA synthetases class II core domain (F), PheRS DNA binding domain 3	Phenylalanyl-tRNA synthetase, Aminoacyl-tRNA synthetase, class II, PheRS, DNA binding domain 3, Phenylalanyl-tRNA synthetase, class IIc, alpha subunit	GO:0000049|GO:0004812|GO:0005524|GO:0043039|GO:0000166|GO:0004826|GO:0005524|GO:0005737|GO:0006432	KEGG: 00970+6.1.1.20, KEGG: 00970+6.1.1.20|Reactome: R-HSA-379716		Aminoacyl-tRNA synthetase, class II			Phenylalanyl-tRNA synthetase, class IIc, alpha subunit
g696	1	2466629	2467755		2		1	2	2			355	1.13	Fungal domain of unknown function (DUF1746)	Domain of unknown function DUF1746, DSC E3 ubiquitin ligase complex subunit 4-like	GO:0035103|GO:0044695							DSC E3 ubiquitin ligase complex subunit 4-like
g697	1	2467827	2469041									404	1.49	RNA 3'-terminal phosphate cyclase, RNA 3'-terminal phosphate cyclase (RTC), insert domain	RNA 3'-terminal phosphate cyclase/enolpyruvate transferase, alpha/beta, RNA 3'-terminal phosphate cyclase domain, RNA 3'-terminal phosphate cyclase, RNA 3'-terminal phosphate cyclase domain superfamily, RNA 3'-terminal phosphate cyclase, insert domain superfamily, RNA 3'-terminal phosphate cyclase type 2, RNA 3'-terminal phosphate cyclase, insert domain	GO:0003824|GO:0006396|GO:0005730|GO:0042254	Reactome: R-HSA-6790901|Reactome: R-HSA-6791226	RNA 3'-terminal phosphate cyclase type 2			RNA 3'-terminal phosphate cyclase/enolpyruvate transferase, alpha/beta	RNA 3'-terminal phosphate cyclase type 2	RNA 3'-terminal phosphate cyclase, RNA 3'-terminal phosphate cyclase type 2
g698	1	2469336	2471761									792	0.38		Pentatricopeptide repeat, Tetratricopeptide-like helical domain superfamily	GO:0005515			Pentatricopeptide repeat, Pentatricopeptide repeat, Pentatricopeptide repeat
g699	1	2472267	2473017									232	0.43	Bromodomain associated	Histone-fold, Bromodomain associated domain	GO:0046982				Bromodomain associated domain
g700	1	2473951	2476333									702	0.71	WD40-like Beta Propeller Repeat, Prolyl oligopeptidase family	WD40-like Beta Propeller, Alpha/Beta hydrolase fold, Peptidase S9, prolyl oligopeptidase, catalytic domain	GO:0006508|GO:0008236					Alpha/Beta hydrolase fold
g701	1	2477327	2477983									180		Histone acetyltransferase subunit NuA4	Chromatin modification-related protein Eaf6	GO:0000123|GO:0016573	Reactome: R-HSA-3214847|Reactome: R-HSA-6804758						Chromatin modification-related protein Eaf6
g702	1	2478726	2480242									400	0.5	PWI domain	PWI domain, PWI domain superfamily	GO:0006397			PWI domain	PWI domain	PWI domain superfamily
g703	1	2480610	2481454									229	0.87	Nas2 N_terminal domain, PDZ domain	PDZ superfamily, Nas2, N-terminal, PDZ domain 6, 26S Proteasome non-ATPase regulatory subunit 9	GO:0005515|GO:0070682	Reactome: R-HSA-1169091|Reactome: R-HSA-1234176|Reactome: R-HSA-1236974|Reactome: R-HSA-1236978|Reactome: R-HSA-174084|Reactome: R-HSA-174113|Reactome: R-HSA-174154|Reactome: R-HSA-174178|Reactome: R-HSA-174184|Reactome: R-HSA-180534|Reactome: R-HSA-180585|Reactome: R-HSA-187577|Reactome: R-HSA-195253|Reactome: R-HSA-202424|Reactome: R-HSA-211733|Reactome: R-HSA-2467813|Reactome: R-HSA-2871837|Re…				PDZ superfamily		26S Proteasome non-ATPase regulatory subunit 9
g704	1	2482119	2484071									262	2.29	Ras family	Ran GTPase, Small GTP-binding protein domain, P-loop containing nucleoside triphosphate hydrolase, Small GTPase	GO:0003924|GO:0005525|GO:0006913|GO:0005525|GO:0003924|GO:0005525	Reactome: R-HSA-165054|Reactome: R-HSA-1655829|Reactome: R-HSA-168333|Reactome: R-HSA-180746|Reactome: R-HSA-203927|Reactome: R-HSA-5578749|Reactome: R-HSA-6784531		Ran GTPase		P-loop containing nucleoside triphosphate hydrolase	Small GTP-binding protein domain	Ran GTPase
g705	1	2487169	2489170									584	0.51	Homeodomain	Homeobox domain, Homeobox-like domain superfamily, Homeobox, conserved site	GO:0003677|GO:0006355|GO:0043565		Homeobox domain	Homeobox domain	Homeobox domain	Homeobox-like domain superfamily
g706	1	2490193	2491758									521	1.54	ATP-NAD kinase	NAD kinase, NAD kinase/diacylglycerol kinase-like domain superfamily, ATP-NAD kinase, PpnK-type, C-terminal, Inorganic polyphosphate/ATP-NAD kinase, N-terminal	GO:0003951|GO:0006741|GO:0003951|GO:0019674|GO:0003951	KEGG: 00760+2.7.1.23|MetaCyc: PWY-5083|MetaCyc: PWY-7268|MetaCyc: PWY-7269|Reactome: R-HSA-196807				NAD kinase/diacylglycerol kinase-like domain superfamily
g707	1	2495718	2496582									250	1.2	3' exoribonuclease family, domain 1	Exoribonuclease, phosphorolytic domain 1, Exoribonuclease, PH domain 2 superfamily, Ribosomal protein S5 domain 2-type fold, PNPase/RNase PH domain superfamily		Reactome: R-HSA-380994|Reactome: R-HSA-429958|Reactome: R-HSA-450385|Reactome: R-HSA-450513|Reactome: R-HSA-450604|Reactome: R-HSA-6791226				Exoribonuclease, PH domain 2 superfamily, Ribosomal protein S5 domain 2-type fold
g708	1	2496977	2498260									427	0.94	Phosphotyrosyl phosphate activator (PTPA) protein	Phosphotyrosyl phosphatase activator, PTPA, Phosphotyrosyl phosphatase activator, C-terminal lid domain, PTPA superfamily	GO:0019211		Phosphotyrosyl phosphatase activator, PTPA			PTPA superfamily		Phosphotyrosyl phosphatase activator, PTPA
g709	1	2501950	2504600									585	1.54
g710	1	2512419	2513598									325		PITH domain, Thioredoxin	Thioredoxin domain, PITH domain, Galactose-binding-like domain superfamily, Thioredoxin-like superfamily, PITH domain superfamily				Thioredoxin domain, PITH domain		Galactose-binding-like domain superfamily, Thioredoxin-like superfamily
g711	1	2517680	2519230									496	1.01	Clr5 domain	Tetratricopeptide-like helical domain superfamily, Clr5 domain	GO:0005515
g712	1	2519749	2520573									232		DnaJ domain	DnaJ domain, Chaperone J-domain superfamily			DnaJ domain	DnaJ domain	DnaJ domain	Chaperone J-domain superfamily
g713	1	2522115	2523045									207		LSM domain	LSM domain, eukaryotic/archaea-type, LSM domain superfamily					LSM domain, eukaryotic/archaea-type	LSM domain superfamily
g714	1	2523405	2524042									173	1.16	ribosomal L5P family C-terminus, Ribosomal protein L5	Ribosomal protein L5, C-terminal, Ribosomal protein L5, Ribosomal protein L5 domain superfamily, Ribosomal protein L5, conserved site, Ribosomal protein L5, N-terminal	GO:0003735|GO:0005840|GO:0006412	Reactome: R-HSA-156827|Reactome: R-HSA-156902|Reactome: R-HSA-1799339|Reactome: R-HSA-192823|Reactome: R-HSA-2408557|Reactome: R-HSA-6791226|Reactome: R-HSA-72689|Reactome: R-HSA-72706|Reactome: R-HSA-72764|Reactome: R-HSA-9010553|Reactome: R-HSA-9633012|Reactome: R-HSA-975956|Reactome: R-HSA-975957				Ribosomal protein L5 domain superfamily		Ribosomal protein L5
g715	1	2526067	2528494			1	1					552	0.36	ATP synthase alpha/beta chain, C terminal domain, ATP synthase alpha/beta family, beta-barrel domain, ATP synthase alpha/beta family, nucleotide-binding domain	ATP synthase, F1 complex, alpha subunit, ATPase, alpha/beta subunit, nucleotide-binding domain, active site, ATP synthase, alpha subunit, C-terminal, ATP synthase, alpha subunit, C-terminal domain superfamily, ATP synthase, F1 complex, alpha subunit nucleotide-binding domain, P-loop containing nucleoside triphosphate hydrolase, ATP synthase subunit alpha, N-terminal domain-like superfamily, ATPas…	GO:0015986|GO:0045261|GO:0046933|GO:0005524|GO:0015986|GO:0032559|GO:0046034|GO:1902600	KEGG: 00190+7.1.2.2|KEGG: 00195+7.1.2.2|MetaCyc: PWY-7980|Reactome: R-HSA-1268020|Reactome: R-HSA-163210|Reactome: R-HSA-8949613, KEGG: 00190+7.1.2.2|KEGG: 00195+7.1.2.2|MetaCyc: PWY-7980	ATP synthase, F1 complex, alpha subunit nucleotide-binding domain			P-loop containing nucleoside triphosphate hydrolase, ATPase, F1/V1/A1 complex, alpha/beta subunit, N-terminal domain superfamily	ATP synthase, F1 complex, alpha subunit
g716	1	2531399	2532856									485	0.62
g717	1	2538475	2539746									341	0.88	Carbohydrate kinase	ATP-dependent (S)-NAD(P)H-hydrate dehydratase, Ribokinase-like, Carbohydrate kinase, predicted, conserved site	GO:0052855	Reactome: R-HSA-197264	ATP-dependent (S)-NAD(P)H-hydrate dehydratase	ATP-dependent (S)-NAD(P)H-hydrate dehydratase		Ribokinase-like	ATP-dependent (S)-NAD(P)H-hydrate dehydratase
g718	1	2545297	2547084									343	1.17	WLM domain	WLM domain				WLM domain
g719	1	2552468	2553346									222
g720	1	2554762	2557543									910	1.21	Fungal Zn(2)-Cys(6) binuclear cluster domain	Zn(2)-C6 fungal-type DNA-binding domain, Zn(2)-C6 fungal-type DNA-binding domain superfamily	GO:0000981|GO:0006355|GO:0008270|GO:0042025		Zn(2)-C6 fungal-type DNA-binding domain	Zn(2)-C6 fungal-type DNA-binding domain	Zn(2)-C6 fungal-type DNA-binding domain	Zn(2)-C6 fungal-type DNA-binding domain superfamily
g721	1	2558026	2558547									173		Domain of unknown function (DUF1993)	DinB/YfiT-like putative metalloenzymes, Protein of unknown function DUF1993						DinB/YfiT-like putative metalloenzymes		Protein of unknown function DUF1993
g722	1	2559579	2564499									1497	0.4	PH domain, RhoGAP domain	Rho GTPase activation protein, Rho GTPase-activating protein domain, PX domain superfamily, Pleckstrin homology domain, PH-like domain superfamily	GO:0007165|GO:0035091	Reactome: R-HSA-194840		Rho GTPase-activating protein domain, Pleckstrin homology domain	Rho GTPase-activating protein domain, Pleckstrin homology domain	Rho GTPase activation protein
g723	1	2571362	2572043									202	0.5
g724	1	2572363	2576420		2		1	2	2			1166	1.03	CorA-like Mg2+ transporter protein
g725	1	2579104	2581619		12		6	7	11			786	0.38	STAS domain, Sulfate permease family, Sulfate permease family	STAS domain, SLC26A/SulP transporter, SLC26A/SulP transporter domain, Sulphate anion transporter, conserved site	GO:0008271|GO:0008272|GO:0016020|GO:0055085|GO:0008272|GO:0015116|GO:0016021|GO:0008271|GO:0008272	Reactome: R-HSA-427601		STAS domain				SLC26A/SulP transporter, SLC26A/SulP transporter
g726	1	2583767	2585321									482	0.83	Rab-GTPase-TBC domain	Rab-GTPase-TBC domain, Rab-GTPase-TBC domain superfamily				Rab-GTPase-TBC domain	Rab-GTPase-TBC domain	Rab-GTPase-TBC domain superfamily, Rab-GTPase-TBC domain superfamily, Rab-GTPase-TBC domain superfamily
g727	1	2586332	2587825		7		4	4	7			497	1.81	Haemolysin-III related	AdipoR/Haemolysin-III-related	GO:0016021							AdipoR/Haemolysin-III-related
g728	1	2590107	2590873									211	1.9	Fms-interacting protein/Thoc5	THO complex, subunit 5		Reactome: R-HSA-159236|Reactome: R-HSA-72187|Reactome: R-HSA-73856						THO complex, subunit 5
g729	1	2593889	2595718		2		1	2				552	1.27	Glycosyl transferase family group 2	Glycosyltransferase 2-like, Nucleotide-diphospho-sugar transferases		Reactome: R-HSA-913709				Nucleotide-diphospho-sugar transferases
g730	1	2596599	2597422		1		1	1				228	1.32		Class I glutamine amidotransferase-like						Class I glutamine amidotransferase-like
g731	1	2598607	2600246									463	0.22	FKBP-type peptidyl-prolyl cis-trans isomerase, Nucleoplasmin-like domain	Peptidyl-prolyl cis-trans isomerase Fpr3/Fpr4-like, FKBP-type peptidyl-prolyl cis-trans isomerase domain, Nucleoplasmin-like domain	GO:0003755			FKBP-type peptidyl-prolyl cis-trans isomerase domain
g732	1	2601568	2603656									620	1.29	Protein kinase domain	Serine/threonine-protein kinase, active site, AGC-kinase, C-terminal, Protein kinase domain, Protein kinase-like domain superfamily, Protein kinase, ATP binding site	GO:0004672|GO:0006468|GO:0004674|GO:0005524|GO:0006468|GO:0004672|GO:0005524|GO:0006468|GO:0005524			AGC-kinase, C-terminal, Protein kinase domain	Protein kinase domain, AGC-kinase, C-terminal	Protein kinase-like domain superfamily
g733	1	2603847	2605525		2		1	2	2			540	1.3	Endonuclease/Exonuclease/phosphatase family	Endonuclease/exonuclease/phosphatase, Endonuclease/exonuclease/phosphatase superfamily, Sphingomyelin phosphodiesterase 2-like		Reactome: R-HSA-1660662|Reactome: R-HSA-193681|Reactome: R-HSA-5626978				Endonuclease/exonuclease/phosphatase superfamily		Sphingomyelin phosphodiesterase 2-like
g734	1	2606783	2607536									214	1.4		Antibiotic biosynthesis monooxygenase domain, Dimeric alpha-beta barrel				Antibiotic biosynthesis monooxygenase domain		Dimeric alpha-beta barrel
g735	1	2607986	2609499									468	0.64	KH domain, KH domain, KH domain	K Homology domain, type 1 superfamily, K Homology domain, type 1, K Homology domain	GO:0003723|GO:0003676				K Homology domain, K Homology domain, K Homology domain	K Homology domain, type 1 superfamily, K Homology domain, type 1 superfamily, K Homology domain, type 1 superfamily
g736	1	2610773	2611798									294			Centromere protein Cenp-K	GO:0005634|GO:0051382	Reactome: R-HSA-141444|Reactome: R-HSA-2467813|Reactome: R-HSA-2500257|Reactome: R-HSA-5663220|Reactome: R-HSA-606279|Reactome: R-HSA-68877|Reactome: R-HSA-9648025						Centromere protein Cenp-K
g737	1	2612442	2613023									169		dUTPase	dUTPase, trimeric, Deoxyuridine triphosphate nucleotidohydrolase, dUTPase-like superfamily, dUTPase-like	GO:0000287|GO:0004170|GO:0006226|GO:0046081	KEGG: 00240+3.6.1.23|KEGG: 00983+3.6.1.23	dUTPase, trimeric			dUTPase-like superfamily	Deoxyuridine triphosphate nucleotidohydrolase	Deoxyuridine triphosphate nucleotidohydrolase
g738	1	2613310	2614622									352	1.14	Phosphomethylpyrimidine kinase	Pyridoxine kinase, Ribokinase-like, Pyridoxamine kinase/Phosphomethylpyrimidine kinase	GO:0008478|GO:0009443	KEGG: 00750+2.7.1.35|MetaCyc: PWY-7204|MetaCyc: PWY-7282|Reactome: R-HSA-6798695|Reactome: R-HSA-964975, Reactome: R-HSA-6798695|Reactome: R-HSA-964975	Pyridoxine kinase			Ribokinase-like	Pyridoxine kinase	Pyridoxine kinase
g739	1	2615893	2617115									279	2.15	Proliferating cell nuclear antigen, C-terminal domain, Proliferating cell nuclear antigen, N-terminal domain	Proliferating cell nuclear antigen, PCNA, C-terminal, Proliferating cell nuclear antigen, PCNA, N-terminal, Proliferating cell nuclear antigen, PCNA, conserved site, Proliferating cell nuclear antigen, PCNA	GO:0003677|GO:0006275|GO:0003677|GO:0006275|GO:0030337	Reactome: R-HSA-110312|Reactome: R-HSA-110314|Reactome: R-HSA-110320|Reactome: R-HSA-1362277|Reactome: R-HSA-174411|Reactome: R-HSA-174414|Reactome: R-HSA-174417|Reactome: R-HSA-174437|Reactome: R-HSA-4615885|Reactome: R-HSA-5358565|Reactome: R-HSA-5358606|Reactome: R-HSA-5651801|Reactome: R-HSA-5655862|Reactome: R-HSA-5656121|Reactome: R-HSA-5656169|Reactome: R-HSA-5685942|Reactome: R-HSA-569639…					Proliferating cell nuclear antigen, PCNA	Proliferating cell nuclear antigen, PCNA
g740	1	2618173	2620252		2		1	2	2			617	0.65	Mysoin-binding motif of peroxisomes	Myosin-binding domain	GO:0017022
g741	1	2621395	2623665									756	1.46
g742	1	2624361	2645256		1		1	1				6904	0.17
g743	1	2646207	2647277									356	1.12	Cytochrome P450	Cytochrome P450 superfamily, Cytochrome P450, Cytochrome P450, E-class, group I	GO:0005506|GO:0016705|GO:0020037|GO:0055114					Cytochrome P450 superfamily
g744	1	2649757	2650906									336
g745	1	2655647	2658250		1		1	1				867	1.04	Cullin family, Anaphase promoting complex (APC) subunit 2	Winged helix DNA-binding domain superfamily, Winged helix-like DNA-binding domain superfamily, Cullin homology domain superfamily, Anaphase-promoting complex subunit 2, C-terminal, Cullin, N-terminal, Cullin homology domain	GO:0006511|GO:0031625	Reactome: R-HSA-8951664, Reactome: R-HSA-141430|Reactome: R-HSA-174048|Reactome: R-HSA-174084|Reactome: R-HSA-174154|Reactome: R-HSA-174178|Reactome: R-HSA-174184|Reactome: R-HSA-176407|Reactome: R-HSA-176408|Reactome: R-HSA-176409|Reactome: R-HSA-176412|Reactome: R-HSA-179409|Reactome: R-HSA-2467813|Reactome: R-HSA-2559582|Reactome: R-HSA-69017|Reactome: R-HSA-8853884|Reactome: R-HSA-983168		Cullin homology domain	Anaphase-promoting complex subunit 2, C-terminal, Cullin homology domain	Winged helix DNA-binding domain superfamily, Cullin homology domain superfamily
g746	1	2662613	2663635									286	1.75
g747	1	2672566	2673069		2		1	2	2			167	1.8	ER protein Pkr1	V-type ATPase assembly factor Pkr1	GO:0070072							V-type ATPase assembly factor Pkr1
g748	1	2673499	2675914		10		5	6	11			710	1.27	MFS/sugar transport protein	MFS transporter superfamily						MFS transporter superfamily
g749	1	2677127	2683238									2000	0.45	BAR domain, RhoGEF domain	Dbl homology (DH) domain superfamily, Dbl homology (DH) domain, AH/BAR domain superfamily, BAR domain	GO:0005085|GO:0005515|GO:0005737		Dbl homology (DH) domain	Dbl homology (DH) domain	Dbl homology (DH) domain	Dbl homology (DH) domain superfamily, AH/BAR domain superfamily
g750	1	2688914	2690624									479	1.46	Reverse transcriptase (RNA-dependent DNA polymerase)	Reverse transcriptase domain, Telomerase reverse transcriptase, DNA/RNA polymerase superfamily	GO:0003677|GO:0003721	Reactome: R-HSA-171319|Reactome: R-HSA-201722		Reverse transcriptase domain		DNA/RNA polymerase superfamily		Telomerase reverse transcriptase
g751	1	2690801	2692481		8		5	4	4			539	1.3	Membrane bound O-acyl transferase family	Wax synthase domain
g752	1	2693887	2695158									423	2.13
g753	1	2695807	2697027									406	0.49
g754	1	2698808	2699896						2			323	0.62	Mitochondrial carrier protein, Mitochondrial carrier protein, Mitochondrial carrier protein	Mitochondrial substrate/solute carrier, Mitochondrial carrier protein, Mitochondrial carrier domain superfamily	GO:0005347|GO:0055085			Mitochondrial substrate/solute carrier, Mitochondrial substrate/solute carrier, Mitochondrial substrate/solute carrier		Mitochondrial carrier domain superfamily
g755	1	2700006	2701402									376	0.53	Inosine-uridine preferring nucleoside hydrolase	Ribonucleoside hydrolase-like, Inosine/uridine-preferring nucleoside hydrolase, Inosine/uridine-preferring nucleoside hydrolase domain						Ribonucleoside hydrolase-like		Inosine/uridine-preferring nucleoside hydrolase
g756	1	2701936	2703620									544		RED-like protein N-terminal region	Protein Red-like, RED-like, N-terminal	GO:0005634							Protein Red-like
g757	1	2704399	2707512									1037	1.16	impB/mucB/samB family, Ubiquitin binding region, Ubiquitin binding region, impB/mucB/samB family C-terminal domain, DNA repair protein REV1 C-terminal domain	BRCT domain superfamily, UmuC domain, HUWE1/Rev1, ubiquitin binding region, BRCT domain, DNA/RNA polymerase superfamily, DNA polymerase, Y-family, little finger domain, Reverse transcriptase/Diguanylate cyclase domain, DNA polymerase, Y-family, little finger domain superfamily, Rev1, C-terminal domain superfamily, DNA repair protein Rev1, C-terminal	GO:0006281|GO:0003684|GO:0006281	Reactome: R-HSA-5656169, Reactome: R-HSA-110312|Reactome: R-HSA-5655862|Reactome: R-HSA-5656121|Reactome: R-HSA-5656169		BRCT domain, UmuC domain		BRCT domain superfamily, DNA/RNA polymerase superfamily, DNA polymerase, Y-family, little finger domain superfamily
g758	1	2710325	2712193									604	0.5	Bacterial alpha-L-rhamnosidase C-terminal domain, Bacterial alpha-L-rhamnosidase 6 hairpin glycosidase domain	Alpha-L-rhamnosidase C-terminal domain, Alpha-L-rhamnosidase, six-hairpin glycosidase domain, Six-hairpin glycosidase superfamily, Six-hairpin glycosidase-like superfamily	GO:0003824	MetaCyc: PWY-7134				Six-hairpin glycosidase superfamily
g759	1	2712785	2713508		4		2	3	4			222	0.45	ER membrane protein SH3	Secretory component protein Psh3/Shr3					Secretory component protein Psh3/Shr3			Secretory component protein Psh3/Shr3
g760	1	2713954	2714982									325	1.23	Thymidylate synthase	Thymidylate synthase/dCMP hydroxymethylase domain, Thymidylate synthase, Thymidylate synthase/dCMP hydroxymethylase superfamily, Thymidylate synthase, active site	GO:0004799|GO:0006231	KEGG: 00240+2.1.1.45|KEGG: 00670+2.1.1.45|MetaCyc: PWY-3841|MetaCyc: PWY-7184|MetaCyc: PWY-7187|MetaCyc: PWY-7198|MetaCyc: PWY-7199|MetaCyc: PWY-7210|Reactome: R-HSA-499943|Reactome: R-HSA-69205	Thymidylate synthase/dCMP hydroxymethylase domain			Thymidylate synthase/dCMP hydroxymethylase superfamily	Thymidylate synthase
g761	1	2716558	2717601									331	1.51	Mitochondrial carrier protein, Mitochondrial carrier protein, Mitochondrial carrier protein	Mitochondrial substrate/solute carrier, Mitochondrial carrier domain superfamily				Mitochondrial substrate/solute carrier, Mitochondrial substrate/solute carrier, Mitochondrial substrate/solute carrier		Mitochondrial carrier domain superfamily
g762	1	2717937	2718607		5		3	3	4			185	0.54	TspO/MBR family	TspO/MBR-related superfamily, TspO/MBR-related protein	GO:0016021		TspO/MBR-related protein					TspO/MBR-related protein
g763	1	2719397	2721267									603	1.82	AAA domain	Winged helix-like DNA-binding domain superfamily, P-loop containing nucleoside triphosphate hydrolase, AAA+ ATPase domain, Cell division protein Cdc6/18	GO:0006270|GO:0051301	Reactome: R-HSA-1362277|Reactome: R-HSA-176187|Reactome: R-HSA-68689|Reactome: R-HSA-68827|Reactome: R-HSA-68867|Reactome: R-HSA-68949|Reactome: R-HSA-68962|Reactome: R-HSA-69017|Reactome: R-HSA-69205				P-loop containing nucleoside triphosphate hydrolase
g764	1	2723046	2725644									848	0.24	Arrestin (or S-antigen), N-terminal domain	Arrestin C-terminal-like domain, Immunoglobulin E-set, Arrestin-like, N-terminal, Arrestin, C-terminal					Arrestin C-terminal-like domain	Immunoglobulin E-set
g765	1	2726320	2727102									260	0.77	HSCB C-terminal oligomerisation domain, DnaJ domain	Chaperone J-domain superfamily, Co-chaperone HscB, C-terminal oligomerisation domain, DnaJ domain, Co-chaperone Hsc20, HscB, C-terminal domain superfamily	GO:0051259|GO:0001671|GO:0051087|GO:0097428	Reactome: R-HSA-1268020|Reactome: R-HSA-1362409	DnaJ domain	DnaJ domain	DnaJ domain	Chaperone J-domain superfamily, HscB, C-terminal domain superfamily	Co-chaperone Hsc20	Co-chaperone Hsc20
g766	1	2727848	2729512									488	1.64	FMN-dependent dehydrogenase, Cytochrome b5-like Heme/Steroid binding domain	Cytochrome b5-like heme/steroid binding domain superfamily, FMN-dependent dehydrogenase, FMN hydroxy acid dehydrogenase domain, Cytochrome b5-like heme/steroid binding domain, L-mandelate/L-lactate dehydrogenase, FMN-binding domain, Aldolase-type TIM barrel, Cytochrome b5, heme-binding site	GO:0016491|GO:0003824|GO:0020037	Reactome: R-HSA-9033241	L-mandelate/L-lactate dehydrogenase, FMN-binding domain	FMN hydroxy acid dehydrogenase domain, Cytochrome b5-like heme/steroid binding domain	Cytochrome b5-like heme/steroid binding domain	Cytochrome b5-like heme/steroid binding domain superfamily
g767	1	2731880	2733021		1		1	1	1			343	1.46	Protein of unknown function (DUF3712)	Protein of unknown function DUF3712
g768	1	2733339	2734234									252		HCNGP-like protein	SAP30-binding protein	GO:0006355	Reactome: R-HSA-427413						SAP30-binding protein
g769	1	2734646	2738392									1210	0.58	Helicase conserved C-terminal domain, DEAD/DEAH box helicase	ATP-dependent RNA helicase DEAD-box, conserved site, Helicase, C-terminal, Helicase superfamily 1/2, ATP-binding domain, P-loop containing nucleoside triphosphate hydrolase, DEAD/DEAH box helicase domain, RNA helicase, DEAD-box type, Q motif	GO:0003676|GO:0005524			Helicase superfamily 1/2, ATP-binding domain, Helicase, C-terminal, RNA helicase, DEAD-box type, Q motif	Helicase superfamily 1/2, ATP-binding domain, Helicase, C-terminal	P-loop containing nucleoside triphosphate hydrolase
g770	1	2738820	2739265									120	0.83
g771	1	2741644	2743418									569	5.62	Zinc finger, C2H2 type	Zinc finger C2H2 superfamily, Zinc finger C2H2-type				Zinc finger C2H2-type, Zinc finger C2H2-type	Zinc finger C2H2-type, Zinc finger C2H2-type, Zinc finger C2H2-type	Zinc finger C2H2 superfamily
g772	1	2745074	2745834									124		Ribosomal L29 protein	Ribosomal protein L29/L35, Ribosomal protein L29/L35 superfamily	GO:0003735|GO:0005840|GO:0006412	Reactome: R-HSA-156827|Reactome: R-HSA-156902|Reactome: R-HSA-1799339|Reactome: R-HSA-192823|Reactome: R-HSA-2408557|Reactome: R-HSA-6791226|Reactome: R-HSA-72689|Reactome: R-HSA-72706|Reactome: R-HSA-72764|Reactome: R-HSA-9010553|Reactome: R-HSA-9633012|Reactome: R-HSA-975956|Reactome: R-HSA-975957				Ribosomal protein L29/L35 superfamily	Ribosomal protein L29/L35
g773	1	2746187	2746985		1		1	1	1			228	0.44	Snare region anchored in the vesicle membrane C-terminus	Golgi SNAP receptor complex, subunit 1	GO:0000139|GO:0005801|GO:0006888|GO:0016021	Reactome: R-HSA-6807878|Reactome: R-HSA-6811438						Golgi SNAP receptor complex, subunit 1
g774	1	2747124	2748223									346	0.58	ATP10 protein	ATPase assembly factor ATP10								ATPase assembly factor ATP10
g775	1	2748597	2750119									488	0.82	e3 binding domain, Biotin-requiring enzyme, 2-oxoacid dehydrogenases acyltransferase (catalytic domain)	Peripheral subunit-binding domain, E3-binding domain superfamily, 2-oxo acid dehydrogenase, lipoyl-binding site, Biotin/lipoyl attachment, 2-oxoacid dehydrogenase acyltransferase, catalytic domain, Chloramphenicol acetyltransferase-like domain superfamily, Single hybrid motif	GO:0016746	Reactome: R-HSA-389661		Biotin/lipoyl attachment, Peripheral subunit-binding domain		E3-binding domain superfamily, Single hybrid motif
g776	1	2751284	2752056									231	0.87	Shikimate kinase	P-loop containing nucleoside triphosphate hydrolase, Carbohydrate kinase, thermoresistant glucokinase, Shikimate kinase/gluconokinase	GO:0005975|GO:0016301	KEGG: 00030+2.7.1.12|MetaCyc: PWY-5530, KEGG: 00400+2.7.1.71|MetaCyc: PWY-6163	Carbohydrate kinase, thermoresistant glucokinase			P-loop containing nucleoside triphosphate hydrolase	Carbohydrate kinase, thermoresistant glucokinase
g777	1	2756353	2758911									707	0.85	Peptidase family M49	Peptidase family M49, Dipeptidyl-peptidase 3	GO:0005737|GO:0006508|GO:0008239							Peptidase family M49
g778	1	2759415	2760395									200		Ribosomal protein L6e	Ribosomal protein L2, domain 2, Translation protein SH3-like domain superfamily, 60S ribosomal protein L6E, Ribosomal Protein L6, KOW domain	GO:0003735|GO:0005840|GO:0006412	Reactome: R-HSA-156827|Reactome: R-HSA-156902|Reactome: R-HSA-1799339|Reactome: R-HSA-192823|Reactome: R-HSA-2408557|Reactome: R-HSA-6791226|Reactome: R-HSA-72689|Reactome: R-HSA-72706|Reactome: R-HSA-72764|Reactome: R-HSA-9010553|Reactome: R-HSA-9633012|Reactome: R-HSA-975956|Reactome: R-HSA-975957	Ribosomal Protein L6, KOW domain			Translation protein SH3-like domain superfamily		60S ribosomal protein L6E
g779	1	2761099	2763468									789	0.38	AAA lid domain, ATPase family associated with various cellular activities (AAA), C-terminal, D2-small domain, of ClpB protein, AAA domain (Cdc48 subfamily)	ClpA/ClpB, AAA lid domain, Clp ATPase, C-terminal, ClpA/B family, ATPase, AAA-type, core, ClpA/B, conserved site 2, AAA+ ATPase domain, ClpA/B, conserved site 1, P-loop containing nucleoside triphosphate hydrolase	GO:0005524				Clp ATPase, C-terminal, AAA+ ATPase domain, AAA+ ATPase domain	P-loop containing nucleoside triphosphate hydrolase, P-loop containing nucleoside triphosphate hydrolase
g780	1	2764526	2765325									183	0.55	ADP-ribosylation factor family	Small GTPase superfamily, ARF/SAR type, Small GTP-binding protein domain, P-loop containing nucleoside triphosphate hydrolase	GO:0005525					P-loop containing nucleoside triphosphate hydrolase	Small GTP-binding protein domain
g781	1	2766987	2767706	1	1	1	1	1	1			203	0.99	emp24/gp25L/p24 family/GOLD	GOLD domain, TMP21-related, GOLD domain superfamily				GOLD domain	GOLD domain	GOLD domain superfamily		TMP21-related
g782	1	2768262	2771261		1		1	1	1			999	0.6	Protein of unknown function (DUF3405)	Protein of unknown function DUF3405								Protein of unknown function DUF3405, Protein of unknown function DUF3405, Protein of unknown function DUF3405
g783	1	2772667	2773485									272	2.57
g784	1	2773796	2775010									377	0.53	RNA recognition motif. (a.k.a. RRM, RBD, or RNP domain), RNA recognition motif. (a.k.a. RRM, RBD, or RNP domain)	RNA-binding domain superfamily, TatSF1-like, RNA recognition motif 1, Nucleotide-binding alpha-beta plait domain superfamily, RNA recognition motif domain, TatSF1-like	GO:0003676|GO:0000398		TatSF1-like, RNA recognition motif 1	RNA recognition motif domain, RNA recognition motif domain	RNA recognition motif domain, RNA recognition motif domain	RNA-binding domain superfamily, RNA-binding domain superfamily		TatSF1-like
g785	1	2775628	2777111									389	0.51	Proteasome complex subunit Rpn13 ubiquitin receptor	Proteasomal ubiquitin receptor Rpn13/ADRM1, Proteasomal ubiquitin receptor Rpn13/ADRM1 superfamily, UCH-binding domain superfamily	GO:0005634|GO:0005737	Reactome: R-HSA-5689603|Reactome: R-HSA-5689880						Proteasomal ubiquitin receptor Rpn13/ADRM1
g786	1	2777507	2778536									231		EF-1 guanine nucleotide exchange domain, Eukaryotic elongation factor 1 beta central acidic region	Translation elongation factor EF1B, beta/delta subunit, guanine nucleotide exchange domain, Translation elongation factor EF1B, beta/delta chains, conserved site, Translation elongation factor eEF-1beta-like superfamily, Glutathione S-transferase, C-terminal domain superfamily, Translation elongation factor EF1B/ribosomal protein S6, Elongation factor 1 beta central acidic region, eukaryote	GO:0003746|GO:0006414|GO:0003746|GO:0005853|GO:0006414	Reactome: R-HSA-156842	Translation elongation factor EF1B, beta/delta subunit, guanine nucleotide exchange domain		Translation elongation factor EF1B, beta/delta subunit, guanine nucleotide exchange domain, Elongation factor 1 beta central acidic region, eukaryote	Translation elongation factor eEF-1beta-like superfamily, Glutathione S-transferase, C-terminal domain superfamily
g787	1	2779183	2779939									214	0.93	GINS complex protein	GINS complex, subunit Psf1, GINS, helical bundle-like domain superfamily, GINS subunit, domain A	GO:0000811|GO:0006260	Reactome: R-HSA-176974	GINS complex, subunit Psf1			GINS, helical bundle-like domain superfamily		GINS complex, subunit Psf1
g788	1	2781316	2784770		10		6	5	10			1082	0.83	STAS domain, Sulfate permease family, Cyclic nucleotide-binding domain	Cyclic nucleotide-binding domain, STAS domain, STAS domain superfamily, Cyclic nucleotide-binding-like, RmlC-like jelly roll fold, SLC26A/SulP transporter, SLC26A/SulP transporter domain	GO:0008271|GO:0008272|GO:0016020|GO:0055085|GO:0008272|GO:0015116|GO:0016021		Cyclic nucleotide-binding domain	Cyclic nucleotide-binding domain, STAS domain	Cyclic nucleotide-binding domain	STAS domain superfamily, Cyclic nucleotide-binding-like		SLC26A/SulP transporter
g789	1	2785188	2786282									364		Serine-threonine protein kinase 19	Serine-threonine protein kinase 19		KEGG: 04150+2.7.11.1|KEGG: 04151+2.7.11.1|KEGG: 04714+2.7.11.1|KEGG: 04926+2.7.11.1|KEGG: 05163+2.7.11.1|KEGG: 05165+2.7.11.1|KEGG: 05170+2.7.11.1						Serine-threonine protein kinase 19
g790	1	2791886	2794762									943	0.11	Kinesin motor domain	Kinesin motor domain, Kinesin motor domain, conserved site, Kinesin-like protein, Kinesin motor domain superfamily, P-loop containing nucleoside triphosphate hydrolase	GO:0003777|GO:0005524|GO:0007018|GO:0008017|GO:0003777|GO:0005524|GO:0007018|GO:0003777|GO:0007018	Reactome: R-HSA-6811434|Reactome: R-HSA-983189		Kinesin motor domain	Kinesin motor domain	P-loop containing nucleoside triphosphate hydrolase		Kinesin-like protein
g791	1	2797488	2799323		1		1	1	1			611	0.98
g792	1	2799793	2801274									493	0.81	TAFII55 protein conserved region	TAFII55 protein, conserved region, Transcription initiation factor TFIID subunit 7	GO:0005669|GO:0006367|GO:0005669	Reactome: R-HSA-167161|Reactome: R-HSA-167162|Reactome: R-HSA-167172|Reactome: R-HSA-674695|Reactome: R-HSA-6804756|Reactome: R-HSA-73776|Reactome: R-HSA-73779|Reactome: R-HSA-75953|Reactome: R-HSA-76042	TAFII55 protein, conserved region		TAFII55 protein, conserved region			Transcription initiation factor TFIID subunit 7
g793	1	2801654	2802695									328	0.3
g794	1	2803394	2804335									313	0.64	Protein of unknown function (DUF3074)	Domain of unknown function DUF3074
g795	1	2804905	2806665		2		2	1	2			527	0.38	Cytochrome P450	Cytochrome P450, conserved site, Cytochrome P450, E-class, group IV, Cytochrome P450 superfamily, Cytochrome P450	GO:0016705|GO:0055114|GO:0004497|GO:0005506|GO:0016705|GO:0020037|GO:0055114|GO:0005506|GO:0016705|GO:0020037|GO:0055114					Cytochrome P450 superfamily
g796	1	2809150	2810388		1		1	1	1			394	0.51
g797	1	2812688	2814314									505	0.2	RNA recognition motif. (a.k.a. RRM, RBD, or RNP domain), RNA recognition motif. (a.k.a. RRM, RBD, or RNP domain)	RNA recognition motif domain, Nucleotide-binding alpha-beta plait domain superfamily, RNA-binding domain superfamily	GO:0003676			RNA recognition motif domain, RNA recognition motif domain	RNA recognition motif domain, RNA recognition motif domain	RNA-binding domain superfamily, RNA-binding domain superfamily
g798	1	2814749	2815211									127	1.57		NADH dehydrogenase [ubiquinone] 1 beta subcomplex subunit 10		Reactome: R-HSA-611105|Reactome: R-HSA-6799198						NADH dehydrogenase [ubiquinone] 1 beta subcomplex subunit 10
g799	1	2815597	2816235									193	2.07	Mitochondrial ribosomal protein L37	Ribosomal protein L37, mitochondrial		Reactome: R-HSA-5368286|Reactome: R-HSA-5389840|Reactome: R-HSA-5419276						Ribosomal protein L37, mitochondrial
g800	1	2816537	2817905									415	0.24	WH2 motif	WH2 domain	GO:0003779			WH2 domain	WH2 domain
g801	1	2818711	2819949		2		1	2	2			412	0.97
g802	1	2823287	2824111									274	1.09
g803	1	2826140	2828912									685	0.15
g804	1	2830945	2831887									265	0.75		NAD(P)-binding domain superfamily						NAD(P)-binding domain superfamily
g805	1	2832729	2834401	1		1	1			Non-effector	0.857	540	0.74	Polysaccharide lyase family 4, domain III, Rhamnogalacturonan lyase B, N-terminal, Polysaccharide lyase family 4, domain II	Rhamnogalacturonan lyase, domain III, Rhamnogalacturonase B, Rhamnogalacturonase B, N-terminal, Galactose-binding-like domain superfamily, Rhamnogalacturonan lyase, domain II, Glycoside hydrolase-type carbohydrate-binding, Carbohydrate-binding-like fold, Galactose mutarotase-like domain superfamily	GO:0005975|GO:0016837|GO:0005975|GO:0016837|GO:0030246|GO:0030246|GO:0003824|GO:0005975|GO:0030246	MetaCyc: PWY-6771				Galactose-binding-like domain superfamily, Carbohydrate-binding-like fold, Galactose mutarotase-like domain superfamily		Rhamnogalacturonase B
g806	1	2836469	2836702		1		1	1	1			77	1.3
g807	1	2837525	2838574	1		1	1			Non-effector	0.991	349	0.29
g808	1	2840066	2841540									453	0.22	Annexin, Annexin, Annexin, Annexin	Annexin repeat, Annexin, Annexin superfamily, Annexin A14, fungal, Annexin repeat, conserved site	GO:0005509|GO:0005544				Annexin repeat, Annexin repeat, Annexin repeat, Annexin repeat	Annexin superfamily
g809	1	2844293	2846509									679	1.18
g810	1	2848350	2849444									364	1.37		SKP1/BTB/POZ domain superfamily						SKP1/BTB/POZ domain superfamily
g811	1	2850599	2852488									629	0.64
g812	1	2853525	2853863									112	4.46
g813	1	2858490	2860359		1		1	1				587	0.68	Ppx/GppA phosphatase family	ATPase, nucleotide binding domain, Ppx/GppA phosphatase		KEGG: 00230+3.6.1.40				ATPase, nucleotide binding domain, ATPase, nucleotide binding domain
g814	1	2860594	2862764									618	2.1
g815	1	2867600	2875472									2187	1.87	PIF1-like helicase, Helitron helicase-like domain at N-terminus	DNA helicase Pif1-like, P-loop containing nucleoside triphosphate hydrolase, Helitron helicase-like domain	GO:0000723|GO:0003678|GO:0006281					P-loop containing nucleoside triphosphate hydrolase, P-loop containing nucleoside triphosphate hydrolase
g816	1	2880117	2883570		1		1	1				1130	0.53
g817	1	2884533	2887730									799	1.38		Leucine-rich repeat domain superfamily
g818	1	2889966	2895221									1316	1.22	SNF2 family N-terminal domain, HECT-like Ubiquitin-conjugating enzyme (E2)-binding, Helicase conserved C-terminal domain	Helicase superfamily 1/2, ATP-binding domain, SNF2-like, N-terminal domain superfamily, SNF2-related, N-terminal domain, Ubiquitin-conjugating enzyme E2-binding protein, P-loop containing nucleoside triphosphate hydrolase, Helicase, C-terminal	GO:0005524	Reactome: R-HSA-983168		Helicase superfamily 1/2, ATP-binding domain, Helicase, C-terminal	Helicase superfamily 1/2, ATP-binding domain	P-loop containing nucleoside triphosphate hydrolase, P-loop containing nucleoside triphosphate hydrolase
g819	1	2895752	2897077									407	0.74	Questin oxidase-like	Questin oxidase-like	GO:0016491							Questin oxidase-like
g820	1	2897540	2900113									857	0.35	Rad17 P-loop domain	P-loop containing nucleoside triphosphate hydrolase, Checkpoint protein Rad17/Rad24	GO:0006281|GO:0042025	Reactome: R-HSA-176187|Reactome: R-HSA-5685938|Reactome: R-HSA-5693607|Reactome: R-HSA-5693616|Reactome: R-HSA-6804756|Reactome: R-HSA-69473				P-loop containing nucleoside triphosphate hydrolase		Checkpoint protein Rad17/Rad24
g821	1	2900516	2902408									595	0.84	AICARFT/IMPCHase bienzyme, MGS-like domain	Bifunctional purine biosynthesis protein PurH-like, Cytidine deaminase-like, Methylglyoxal synthase-like domain, Methylglyoxal synthase-like domain superfamily, AICAR transformylase, insert domain superfamily, AICAR transformylase, duplicated domain superfamily	GO:0003937|GO:0004643|GO:0006164|GO:0003824	KEGG: 00230+3.5.4.10+2.1.2.3|KEGG: 00670+2.1.2.3|MetaCyc: PWY-6123|MetaCyc: PWY-6124|MetaCyc: PWY-7234|Reactome: R-HSA-73817			Methylglyoxal synthase-like domain, Bifunctional purine biosynthesis protein PurH-like	Cytidine deaminase-like, Methylglyoxal synthase-like domain superfamily	Bifunctional purine biosynthesis protein PurH-like	Bifunctional purine biosynthesis protein PurH-like
g822	1	2903691	2904651									247	1.21	GDSL-like Lipase/Acylhydrolase family	SGNH hydrolase-type esterase domain, SGNH hydrolase superfamily
g823	1	2904785	2907704		4		2	3				619	0.16	PCI domain, Tim17/Tim22/Tim23/Pmp24 family	Winged helix DNA-binding domain superfamily, Proteasome component (PCI) domain, Winged helix-like DNA-binding domain superfamily, 26S Proteasome non-ATPase regulatory subunit 12/COP9 signalosome complex subunit 4, COP9 signalosome complex subunit 4	GO:0008180	Reactome: R-HSA-8951664, Reactome: R-HSA-5696394|Reactome: R-HSA-6781823|Reactome: R-HSA-8856825|Reactome: R-HSA-8951664		Proteasome component (PCI) domain	Proteasome component (PCI) domain	Winged helix DNA-binding domain superfamily		26S Proteasome non-ATPase regulatory subunit 12/COP9 signalosome complex subunit 4, COP9 signalosome complex subunit 4
g824	1	2908518	2910944									808	0.74	DNA polymerase beta palm, DNA polymerase beta thumb, Helix-hairpin-helix domain, Fingers domain of DNA polymerase lambda	DNA polymerase lambda lyase domain superfamily, DNA polymerase family X, Nucleotidyltransferase superfamily, DNA polymerase beta, palm domain, DNA polymerase family X, binding site, DNA-directed DNA polymerase X, BRCT domain superfamily, BRCT domain, DNA polymerase beta, thumb domain, DNA polymerase beta-like, N-terminal domain, DNA polymerase, thumb domain superfamily, DNA polymerase lambda, fin…	GO:0003677|GO:0034061|GO:0016779|GO:0003677|GO:0003887|GO:0003677|GO:0006281		DNA-directed DNA polymerase X	BRCT domain	DNA-directed DNA polymerase X	DNA polymerase lambda lyase domain superfamily, Nucleotidyltransferase superfamily, BRCT domain superfamily
g825	1	2911554	2913393		11		6	6	11			504	1.79	Ammonium Transporter Family	Ammonium transporter, Ammonium transporter AmtB-like domain, Ammonium transporter, conserved site, Ammonium/urea transporter, Blood group Rhesus C/E/D polypeptide	GO:0008519|GO:0016020|GO:0072488|GO:0008519|GO:0015696|GO:0016020|GO:0005887						Ammonium transporter
g826	1	2915728	2917198			1	1					236	1.27
g827	1	2918107	2921679									1151	0.17
g828	1	2924172	2928135		1		1	1				936	1.18	Mediator complex subunit 16	Mediator complex, subunit Med16	GO:0016592	Reactome: R-HSA-1989781|Reactome: R-HSA-212436|Reactome: R-HSA-381340						Mediator complex, subunit Med16
g829	1	2932404	2934062									302	0.66
g830	1	2934591	2935673									360	0.56
g831	1	2936803	2941404	1	2	1	2	1	2			1516	2.04	Sortilin, neurotensin receptor 3,, Sortilin, neurotensin receptor 3,, Sortilin, neurotensin receptor 3, C-terminal, Sortilin, neurotensin receptor 3, C-terminal	Sortilin, N-terminal, WD40/YVTN repeat-like-containing domain superfamily, Sortilin, C-terminal, VPS10	GO:0005515|GO:0016021				VPS10, VPS10
g832	1	2943721	2945890									661	0.15		NTF2-like domain superfamily						NTF2-like domain superfamily
g833	1	2946593	2947983		9		5	5	9			427	1.41	Amino acid permease	Amino acid permease/ SLC12A domain	GO:0016020|GO:0055085
g834	1	2950325	2952510		1		1	1	1			689	0.29	Glycosyl hydrolase family 47	Seven-hairpin glycosidases, Glycoside hydrolase family 47, Six-hairpin glycosidase-like superfamily	GO:0004571|GO:0005509|GO:0016020|GO:0003824					Seven-hairpin glycosidases
g835	1	2953857	2954996									243	0.41	RNA recognition motif. (a.k.a. RRM, RBD, or RNP domain)	RNA-binding domain superfamily, Nucleotide-binding alpha-beta plait domain superfamily, RNA recognition motif domain	GO:0003676			RNA recognition motif domain	RNA recognition motif domain	RNA-binding domain superfamily
g836	1	2955411	2956613									363	1.1	WD domain, G-beta repeat, WD domain, G-beta repeat	WD40 repeat, WD40/YVTN repeat-like-containing domain superfamily, WD40-repeat-containing domain superfamily, Actin-related protein 2/3 complex subunit 1, WD40-repeat-containing domain	GO:0005515|GO:0005885|GO:0015629|GO:0030833|GO:0034314	Reactome: R-HSA-2029482|Reactome: R-HSA-3928662|Reactome: R-HSA-5663213		WD40-repeat-containing domain, WD40 repeat	WD40 repeat, WD40 repeat, WD40 repeat, WD40 repeat, WD40 repeat	WD40-repeat-containing domain superfamily		Actin-related protein 2/3 complex subunit 1
g837	1	2957181	2958175									164	1.83	Endoribonuclease L-PSP	YjgF/YER057c/UK114 family, RidA family, RidA, conserved site, RutC-like superfamily		Reactome: R-HSA-8849175				RutC-like superfamily	RidA family	YjgF/YER057c/UK114 family
g838	1	2959365	2961785		11		6	6	11			770	0.65	Dolichyl-phosphate-mannose-protein mannosyltransferase, C-terminal four TMM region of protein-O-mannosyltransferase, MIR domain	Mir domain superfamily, Glycosyl transferase family 39/83, MIR motif, Protein O-mannosyl-transferase, C-terminal four TM domain, Glycosyltransferase 39-like	GO:0016020|GO:0000030|GO:0006493|GO:0016020	Reactome: R-HSA-5083629|Reactome: R-HSA-5083633|Reactome: R-HSA-5173105, KEGG: 00514+2.4.1.109|KEGG: 00515+2.4.1.109|MetaCyc: PWY-7921|MetaCyc: PWY-7922|MetaCyc: PWY-7979|Reactome: R-HSA-5083629|Reactome: R-HSA-5083633|Reactome: R-HSA-5173105		MIR motif, MIR motif, MIR motif	MIR motif, MIR motif, MIR motif	Mir domain superfamily		Glycosyltransferase 39-like
g839	1	2963096	2964418		1		1	1	1			406	1.48	Cryptococcal mannosyltransferase 1	Mannosyltransferase 1, CMT1								Mannosyltransferase 1, CMT1
g840	1	2966656	2967102									134
g841	1	2969507	2973422									783	1.53		Zinc finger C2H2-type				Zinc finger C2H2-type	Zinc finger C2H2-type, Zinc finger C2H2-type, Zinc finger C2H2-type
g842	1	2974379	2975950									490	1.63	Glutamine amidotransferase domain, Asparagine synthase	Asparagine synthase, Glutamine amidotransferase type 2 domain, Rossmann-like alpha/beta/alpha sandwich fold, Nucleophile aminohydrolases, N-terminal	GO:0004066|GO:0006529		Asparagine synthase			Nucleophile aminohydrolases, N-terminal
g843	1	2977001	2977944		4		2	3	4			260	1.15
g844	1	2980703	2981614	1		1	1			Effector	0.63	303	5.94
g845	1	2981993	2983280									412	1.94		Zinc finger, FYVE/PHD-type, Zinc finger, RING/FYVE/PHD-type, Zinc finger, PHD-type, Zinc finger, PHD-type, conserved site					Zinc finger, PHD-type	Zinc finger, FYVE/PHD-type
g846	1	2983702	2985092									396	1.52	CoA-transferase family III	CoA-transferase family III, CoA-transferase family III domain superfamily	GO:0008410					CoA-transferase family III domain superfamily
g847	1	2987621	2988912									411	1.95	Glycosyl transferase family, a/b domain, Glycosyl transferase family, helical bundle domain	Anthranilate phosphoribosyl transferase, Glycosyl transferase, family 3, Glycosyl transferase family 3, N-terminal domain, Glycosyl transferase family 3, N-terminal domain superfamily, Nucleoside phosphorylase/phosphoribosyltransferase catalytic domain superfamily	GO:0000162|GO:0004048|GO:0016757	KEGG: 00400+2.4.2.18, Reactome: R-HSA-73614|Reactome: R-HSA-73621				Nucleoside phosphorylase/phosphoribosyltransferase catalytic domain superfamily, Glycosyl transferase family 3, N-terminal domain superfamily	Anthranilate phosphoribosyl transferase
g848	1	2990169	2991206									345	2.9	TFIIB zinc-binding, Transcription factor TFIIB repeat, Transcription factor TFIIB repeat	Transcription factor TFIIB, Cyclin-like superfamily, Cyclin-like, Transcription factor TFIIB, conserved site, Zinc finger, TFIIB-type, Transcription factor TFIIB, cyclin-like domain	GO:0006352|GO:0070897|GO:0017025	Reactome: R-HSA-167161|Reactome: R-HSA-167162|Reactome: R-HSA-167172|Reactome: R-HSA-674695|Reactome: R-HSA-6807505|Reactome: R-HSA-73776|Reactome: R-HSA-73779|Reactome: R-HSA-75953|Reactome: R-HSA-76042	Cyclin-like, Cyclin-like	Zinc finger, TFIIB-type	Cyclin-like, Cyclin-like	Cyclin-like superfamily, Cyclin-like superfamily		Transcription factor TFIIB
g849	1	2993662	2994975			1	1					437	1.14	Glutaminase/Asparaginase C-terminal domain, Asparaginase, N-terminal	L-asparaginase, type II, Asparaginase/glutaminase-like, Asparaginase/glutaminase, C-terminal, L-asparaginase, N-terminal domain superfamily, Asparaginase/glutaminase, active site 1, Asparaginase/glutaminase-like superfamily, Asparaginase/glutaminase, active site 2, L-asparaginase, N-terminal, L-asparaginase, C-terminal	GO:0004067|GO:0006528|GO:0006520	KEGG: 00250+3.5.1.1|KEGG: 00460+3.5.1.1, Reactome: R-HSA-8963693	L-asparaginase, type II	Asparaginase/glutaminase-like	Asparaginase/glutaminase-like	Asparaginase/glutaminase-like superfamily	L-asparaginase, type II
g850	1	2996851	3001261		8		4	5	7			1436	1.25	Cation transport ATPase (P-type), Phospholipid-translocating P-type ATPase C-terminal, Phospholipid-translocating ATPase N-terminal, E1-E2 ATPase, haloacid dehalogenase-like hydrolase	P-type ATPase, cytoplasmic domain N, P-type ATPase, P-type ATPase, A domain superfamily, P-type ATPase, subfamily IV, HAD superfamily, P-type ATPase, transmembrane domain superfamily, P-type ATPase, C-terminal, P-type ATPase, N-terminal, HAD-like superfamily, P-type ATPase, phosphorylation site	GO:0000166|GO:0016021|GO:0000287|GO:0005524|GO:0015914|GO:0016021|GO:0140326	Reactome: R-HSA-936837				P-type ATPase, cytoplasmic domain N, P-type ATPase, A domain superfamily, P-type ATPase, transmembrane domain superfamily, HAD-like superfamily	P-type ATPase, P-type ATPase, P-type ATPase, subfamily IV, P-type ATPase, subfamily IV	P-type ATPase, subfamily IV
g851	1	3001380	3002786									417	2.4	Saccharopine dehydrogenase NADP binding domain	Saccharopine dehydrogenase, NADP binding domain, NAD(P)-binding domain superfamily	GO:0016491|GO:0055114					NAD(P)-binding domain superfamily
g852	1	3003082	3004986		14		7	8	14			588	1.7	Major Facilitator Superfamily	Major facilitator superfamily domain, MFS transporter superfamily, Major facilitator superfamily	GO:0022857|GO:0022857|GO:0055085			Major facilitator superfamily domain		MFS transporter superfamily
g853	1	3006659	3009642									900		CUE domain	Ubiquitin system component CUE, UBA-like superfamily, RNA polymerase II degradation factor 1, CUE domain	GO:0005515		RNA polymerase II degradation factor 1, CUE domain			UBA-like superfamily
g854	1	3011522	3012730									402	0.5
g855	1	3013016	3016874									954	0.73	Ribulose-phosphate 3 epimerase family, Oxoglutarate and iron-dependent oxygenase degradation C-term, 2OG-Fe(II) oxygenase superfamily	Aldolase-type TIM barrel, Ribulose-phosphate 3-epimerase-like, Prolyl 4-hydroxylase, alpha subunit, Oxoglutarate/iron-dependent dioxygenase, Oxoglutarate/iron-dependent oxygenase, C-terminal degradation domain, Ribulose-phosphate binding barrel, Prolyl 3,4-dihydroxylase TPA1/OFD1, N-terminal domain	GO:0003824|GO:0005975|GO:0016857|GO:0005506|GO:0016705|GO:0031418|GO:0055114|GO:0016491|GO:0055114|GO:0005506|GO:0016706|GO:0031418|GO:0055114	KEGG: 00030+5.1.3.1|KEGG: 00040+5.1.3.1|KEGG: 00710+5.1.3.1|MetaCyc: PWY-1861|MetaCyc: PWY-5723|Reactome: R-HSA-71336	Ribulose-phosphate 3-epimerase-like	Oxoglutarate/iron-dependent dioxygenase	Prolyl 4-hydroxylase, alpha subunit	Ribulose-phosphate binding barrel
g856	1	3017543	3018106	1		1	1			Non-effector	0.541	156	6.41	CFEM domain	Extracellular membrane protein, CFEM domain					Extracellular membrane protein, CFEM domain
g857	1	3019249	3020567									400	0.25	Alpha/beta hydrolase family	Protein phosphatase methylesterase, eukaryotic, Alpha/Beta hydrolase fold, Alpha/beta hydrolase fold-1	GO:0006482|GO:0051723	Reactome: R-HSA-69273				Alpha/Beta hydrolase fold		Protein phosphatase methylesterase, eukaryotic
g858	1	3028692	3029324									210
g859	1	3031525	3032013									79
g860	1	3037532	3040990									1152	1.22		Zinc finger C2H2-type					Zinc finger C2H2-type, Zinc finger C2H2-type, Zinc finger C2H2-type
g861	1	3044186	3046541	1	7	1	4	4	7			767	0.91	ML-like domain, Transient receptor potential (TRP) ion channel	ML-like domain, Transient receptor potential channel Flc/Pkd2-like, TRP, C-terminal					ML-like domain			Transient receptor potential channel Flc/Pkd2-like
g862	1	3046885	3047997									370	1.08	RNA ligase	RNA ligase domain, REL/Rln2
g863	1	3048745	3051208									755	0.66	CUE domain, Domain of unknown function (DUF5601), Vacuolar sorting protein 9 (VPS9) domain	Vacuolar protein sorting-associated protein 9, CUE domain, Ubiquitin system component CUE, VPS9 domain superfamily, UBA-like superfamily, VPS9 domain, RABX5, catalytic core helical domain	GO:0005515	Reactome: R-HSA-8876198	Vacuolar protein sorting-associated protein 9, CUE domain	Ubiquitin system component CUE, VPS9 domain	Ubiquitin system component CUE, VPS9 domain	VPS9 domain superfamily, UBA-like superfamily
g864	1	3052333	3052968									211	0.47	Domain of unknown function (DUF4291)	Protein of unknown function DUF4291								Protein of unknown function DUF4291
g865	1	3055161	3056219									298	1.34	Enoyl-(Acyl carrier protein) reductase	Short-chain dehydrogenase/reductase SDR, Short-chain dehydrogenase/reductase, conserved site, NAD(P)-binding domain superfamily	GO:0016491					NAD(P)-binding domain superfamily
g866	1	3057293	3057693		2		1	2	2			87	2.3		Ribonuclease kappa	GO:0004521|GO:0090305							Ribonuclease kappa
g867	1	3059723	3060560	1		1	1			Non-effector	0.527	262	1.53	Copper/zinc superoxide dismutase (SODC)	Superoxide dismutase, copper/zinc binding domain, Superoxide dismutase (Cu/Zn) / superoxide dismutase copper chaperone, Superoxide dismutase-like, copper/zinc binding domain superfamily	GO:0006801|GO:0046872	MetaCyc: PWY-6854|Reactome: R-HSA-3299685				Superoxide dismutase-like, copper/zinc binding domain superfamily		Superoxide dismutase (Cu/Zn) / superoxide dismutase copper chaperone
g868	1	3062138	3063890									515	1.75		Pyridoxal phosphate-dependent transferase, major domain, Pyridoxal phosphate-dependent transferase domain 1, Pyridoxal phosphate-dependent transferase	GO:0003824					Pyridoxal phosphate-dependent transferase
g869	1	3065190	3067220									676	1.48
g870	1	3067587	3070561									936	1.5	Fungal specific transcription factor domain, Fungal Zn(2)-Cys(6) binuclear cluster domain	Zn(2)-C6 fungal-type DNA-binding domain, Transcription factor domain, fungi, Zn(2)-C6 fungal-type DNA-binding domain superfamily	GO:0000981|GO:0006355|GO:0008270|GO:0042025|GO:0003677|GO:0005634|GO:0006351|GO:0008270		Zn(2)-C6 fungal-type DNA-binding domain	Zn(2)-C6 fungal-type DNA-binding domain	Zn(2)-C6 fungal-type DNA-binding domain, Transcription factor domain, fungi	Zn(2)-C6 fungal-type DNA-binding domain superfamily
g871	1	3073544	3075734									635	1.73	Fungal Zn(2)-Cys(6) binuclear cluster domain, Fungal specific transcription factor domain	Zn(2)-C6 fungal-type DNA-binding domain, Transcription factor domain, fungi, Zn(2)-C6 fungal-type DNA-binding domain superfamily	GO:0000981|GO:0006355|GO:0008270|GO:0042025|GO:0003677|GO:0005634|GO:0006351|GO:0008270		Zn(2)-C6 fungal-type DNA-binding domain	Zn(2)-C6 fungal-type DNA-binding domain	Transcription factor domain, fungi, Zn(2)-C6 fungal-type DNA-binding domain	Zn(2)-C6 fungal-type DNA-binding domain superfamily
g872	1	3078540	3080164		11		6	6	10			505	1.58	Sugar (and other) transporter	Sugar transporter, conserved site, MFS transporter superfamily, Major facilitator, sugar transporter-like, Sugar/inositol transporter, Major facilitator superfamily domain	GO:0016021|GO:0022857|GO:0055085|GO:0016020|GO:0022857|GO:0055085|GO:0022857	Reactome: R-HSA-189200		Major facilitator superfamily domain		MFS transporter superfamily	Sugar/inositol transporter
g873	1	3080930	3082601	1		1	1			Non-effector	0.899	514	4.67	Glycosyl hydrolase family 7, Fungal cellulose binding domain	Cellulose-binding domain, fungal, Glycoside hydrolase, family 7, Concanavalin A-like lectin/glucanase domain superfamily, Glycoside hydrolase family 7, catalytic domain superfamily, Cellulose-binding domain superfamily	GO:0005576|GO:0005975|GO:0030248|GO:0004553|GO:0005975		Glycoside hydrolase, family 7	Cellulose-binding domain, fungal	Cellulose-binding domain, fungal	Concanavalin A-like lectin/glucanase domain superfamily, Cellulose-binding domain superfamily		Glycoside hydrolase, family 7
g874	1	3085639	3087429									580	1.38	SNF5 / SMARCB1 / INI1	SNF5/SMARCB1/INI1	GO:0000228|GO:0006338	Reactome: R-HSA-3214858|Reactome: R-HSA-8939243						SNF5/SMARCB1/INI1
g875	1	3089477	3090019									180	2.22	DNL zinc finger	Zinc finger, DNL-type, Mitochondrial import protein TIM15	GO:0008270			Zinc finger, DNL-type				Mitochondrial import protein TIM15
g876	1	3090750	3092204									484	1.24	MmgE/PrpD family	MmgE/PrpD, MmgE/PrpD superfamily, domain 1, MmgE/PrpD superfamily	GO:0016829					MmgE/PrpD superfamily		MmgE/PrpD
g877	1	3095405	3096128			1	1					108	0.93
g878	1	3096798	3104791		2		2	1				2647	0.91	Down-regulated in metastasis	Armadillo-type fold, Armadillo-like helical, HEAT, type 2, Down-regulated-in-metastasis protein		Reactome: R-HSA-6790901|Reactome: R-HSA-6791226		HEAT, type 2		Armadillo-type fold, Armadillo-type fold
g879	1	3105101	3106818									553	1.45	Protein similar to CwfJ C-terminus 2, Protein similar to CwfJ C-terminus 1	Cwf19-like protein, C-terminal domain-2, Cwf19-like protein, Cwf19-like, C-terminal domain-1								Cwf19-like protein
g880	1	3108296	3110159									564	1.42	Rhodanese-like domain	Rhodanese-like domain, Rhodanese-like domain superfamily, M-phase inducer phosphatase	GO:0004725|GO:0006470|GO:1902751	Reactome: R-HSA-69273|Reactome: R-HSA-8862803	M-phase inducer phosphatase	Rhodanese-like domain	Rhodanese-like domain	Rhodanese-like domain superfamily
g881	1	3122288	3125361									1008	0.69	DNA polymerase phi	DNA polymerase V/Myb-binding protein 1A, Armadillo-type fold	GO:0003677|GO:0005730|GO:0006355|GO:0008134	Reactome: R-HSA-5250924				Armadillo-type fold		DNA polymerase V/Myb-binding protein 1A
g882	1	3125514	3126542									295		Proteasome subunit A N-terminal signature, Proteasome subunit, Proteasome subunit	Proteasome alpha-subunit, N-terminal domain, Nucleophile aminohydrolases, N-terminal, Proteasome, subunit alpha/beta, Proteasome subunit alpha 3, Proteasome alpha-type subunit	GO:0004175|GO:0006511|GO:0019773|GO:0004298|GO:0005839|GO:0051603|GO:0005839	Reactome: R-HSA-1169091|Reactome: R-HSA-1234176|Reactome: R-HSA-1236974|Reactome: R-HSA-1236978|Reactome: R-HSA-174084|Reactome: R-HSA-174113|Reactome: R-HSA-174154|Reactome: R-HSA-174178|Reactome: R-HSA-174184|Reactome: R-HSA-180534|Reactome: R-HSA-180585|Reactome: R-HSA-187577|Reactome: R-HSA-195253|Reactome: R-HSA-202424|Reactome: R-HSA-211733|Reactome: R-HSA-2467813|Reactome: R-HSA-2871837|Re…		Proteasome alpha-type subunit	Proteasome alpha-subunit, N-terminal domain	Nucleophile aminohydrolases, N-terminal		Proteasome subunit alpha 3
g883	1	3127712	3129424									292	0.34
g884	1	3130145	3131459									418	0.48	Leucine Rich repeat, Leucine Rich repeat	Leucine-rich repeat, Leucine-rich repeat domain superfamily	GO:0005515
g885	1	3132245	3133549		1		1	1				322	1.24	Cytochrome C1 family	Cytochrome c1, Cytochrome c-like domain superfamily, Cytochrome c1, transmembrane anchor, C-terminal	GO:0009055|GO:0020037	Reactome: R-HSA-1268020|Reactome: R-HSA-611105, Reactome: R-HSA-611105				Cytochrome c1, transmembrane anchor, C-terminal, Cytochrome c-like domain superfamily		Cytochrome c1
g886	1	3134621	3135307									228	4.82
g887	1	3135764	3137254									440	1.36	AAA+ lid domain, ATPase family associated with various cellular activities (AAA)	AAA ATPase, AAA+ lid domain, ATPase, AAA-type, conserved site, 26S proteasome regulatory subunit P45-like, P-loop containing nucleoside triphosphate hydrolase, AAA+ ATPase domain, 26S Proteasome regulatory subunit 7, ATPase, AAA-type, core	GO:0005524|GO:0005737|GO:0016787|GO:0030163|GO:0036402	Reactome: R-HSA-1169091|Reactome: R-HSA-1234176|Reactome: R-HSA-1236974|Reactome: R-HSA-1236978|Reactome: R-HSA-174084|Reactome: R-HSA-174113|Reactome: R-HSA-174154|Reactome: R-HSA-174178|Reactome: R-HSA-174184|Reactome: R-HSA-180534|Reactome: R-HSA-180585|Reactome: R-HSA-187577|Reactome: R-HSA-195253|Reactome: R-HSA-202424|Reactome: R-HSA-211733|Reactome: R-HSA-2467813|Reactome: R-HSA-2871837|Re…			AAA+ ATPase domain	P-loop containing nucleoside triphosphate hydrolase	26S proteasome regulatory subunit P45-like	26S Proteasome regulatory subunit 7
g888	1	3137708	3139477									537	1.3	TCP-1/cpn60 chaperonin family	GroEL-like apical domain superfamily, Chaperone tailless complex polypeptide 1 (TCP-1), Chaperonin TCP-1, conserved site, GroEL-like equatorial domain superfamily, TCP-1-like chaperonin intermediate domain superfamily, T-complex protein 1, delta subunit, Chaperonin Cpn60/TCP-1 family	GO:0005524|GO:0006457|GO:0051082|GO:0005524	Reactome: R-HSA-389957|Reactome: R-HSA-389960|Reactome: R-HSA-390450|Reactome: R-HSA-390471|Reactome: R-HSA-6814122, Reactome: R-HSA-389957|Reactome: R-HSA-389960|Reactome: R-HSA-390450|Reactome: R-HSA-390471|Reactome: R-HSA-5620922|Reactome: R-HSA-6814122	T-complex protein 1, delta subunit			TCP-1-like chaperonin intermediate domain superfamily, GroEL-like apical domain superfamily, GroEL-like equatorial domain superfamily	T-complex protein 1, delta subunit
g889	1	3139852	3140343									125
g890	1	3140706	3141053									76	7.89	Cytochrome C oxidase copper chaperone (COX17)	Cytochrome c oxidase copper chaperone, Cysteine alpha-hairpin motif superfamily	GO:0005507|GO:0005758|GO:0006825|GO:0016531	Reactome: R-HSA-1268020				Cysteine alpha-hairpin motif superfamily		Cytochrome c oxidase copper chaperone
g891	1	3141843	3142994									333	0.9	alpha/beta hydrolase fold	Alpha/beta hydrolase fold-3, Alpha/Beta hydrolase fold	GO:0016787					Alpha/Beta hydrolase fold
g892	1	3144168	3145226									352	0.57	Hsp20/alpha crystallin family	HSP20-like chaperone, Alpha crystallin/Hsp20 domain				Alpha crystallin/Hsp20 domain		HSP20-like chaperone
g893	1	3145977	3147584									535	0.75
g894	1	3151345	3154602									1085	0.18	Yeast cortical protein KAR9	Karyogamy protein, KAR9								Karyogamy protein, KAR9
g895	1	3155622	3160334									1570	0.89	DEAD/DEAH box helicase, RQC domain, RecQ zinc-binding, Helicase conserved C-terminal domain	DNA/RNA helicase, ATP-dependent, DEAH-box type, conserved site, Winged helix DNA-binding domain superfamily, Helicase superfamily 1/2, ATP-binding domain, DEAD/DEAH box helicase domain, RQC domain, ATP-dependent DNA helicase RecQ, zinc-binding domain, P-loop containing nucleoside triphosphate hydrolase, HRDC domain, Helicase, C-terminal, Winged helix-like DNA-binding domain superfamily, DNA helic…	GO:0003676|GO:0005524|GO:0006260|GO:0006281|GO:0043138|GO:0003676|GO:0004386|GO:0006310	Reactome: R-HSA-3108214|Reactome: R-HSA-5685938|Reactome: R-HSA-5685942|Reactome: R-HSA-5693554|Reactome: R-HSA-5693568|Reactome: R-HSA-5693579|Reactome: R-HSA-5693607|Reactome: R-HSA-5693616|Reactome: R-HSA-6804756|Reactome: R-HSA-69473		Helicase superfamily 1/2, ATP-binding domain, HRDC domain, Helicase, C-terminal	Helicase superfamily 1/2, ATP-binding domain, Helicase, C-terminal, RQC domain	Winged helix DNA-binding domain superfamily, P-loop containing nucleoside triphosphate hydrolase	DNA helicase, ATP-dependent, RecQ type
g896	1	3161914	3167821									1851	1.08	Ankyrin repeats (3 copies), Ankyrin repeats (3 copies)	Ankyrin repeat, Ankyrin repeat-containing domain superfamily, Ankyrin repeat-containing domain	GO:0005515			Ankyrin repeat, Ankyrin repeat, Ankyrin repeat-containing domain, Ankyrin repeat-containing domain, Ankyrin repeat-containing domain, Ankyrin repeat, Ankyrin repeat-containing domain, Ankyrin repeat, Ankyrin repeat	Ankyrin repeat, Ankyrin repeat, Ankyrin repeat, Ankyrin repeat, Ankyrin repeat, Ankyrin repeat, Ankyrin repeat, Ankyrin repeat, Ankyrin repeat, Ankyrin repeat, Ankyrin repeat	Ankyrin repeat-containing domain superfamily, Ankyrin repeat-containing domain superfamily, Ankyrin repeat-containing domain superfamily
g897	1	3168120	3168918		3		2	2	3			196
g898	1	3170099	3173374									1091	0.55	Helicase conserved C-terminal domain, Type III restriction enzyme, res subunit	Helicase superfamily 1/2, ATP-binding domain, Helicase, C-terminal, Helicase/UvrB, N-terminal, FANCM/Mph1-like, P-loop containing nucleoside triphosphate hydrolase	GO:0003677|GO:0005524|GO:0016787|GO:0006281|GO:0043138			Helicase, C-terminal, Helicase superfamily 1/2, ATP-binding domain	Helicase superfamily 1/2, ATP-binding domain, Helicase, C-terminal	P-loop containing nucleoside triphosphate hydrolase		FANCM/Mph1-like
g899	1	3174634	3176822									658	0.61	TAP C-terminal domain, Nuclear transport factor 2 (NTF2) domain	Leucine-rich repeat domain superfamily, TAP C-terminal (TAP-C) domain, NTF2-like domain superfamily, UBA-like superfamily, Nuclear RNA export factor, Nuclear transport factor 2, Nuclear transport factor 2, eukaryote	GO:0005634|GO:0051028|GO:0005515	Reactome: R-HSA-159236	TAP C-terminal (TAP-C) domain	TAP C-terminal (TAP-C) domain, Nuclear transport factor 2, eukaryote	TAP C-terminal (TAP-C) domain	NTF2-like domain superfamily, UBA-like superfamily		Nuclear RNA export factor
g900	1	3180715	3182952		1		1	1	1			745	0.4		Galactose oxidase/kelch, beta-propeller, Kelch-type beta propeller	GO:0005515					Galactose oxidase/kelch, beta-propeller, Kelch-type beta propeller
g901	1	3187634	3189669									657		Helix-loop-helix DNA-binding domain	Helix-loop-helix DNA-binding domain superfamily, Myc-type, basic helix-loop-helix (bHLH) domain	GO:0046983		Myc-type, basic helix-loop-helix (bHLH) domain	Myc-type, basic helix-loop-helix (bHLH) domain	Myc-type, basic helix-loop-helix (bHLH) domain	Helix-loop-helix DNA-binding domain superfamily
g902	1	3192070	3194195									631	1.27	Dual specificity phosphatase, catalytic domain, Dual specificity protein phosphatase, N-terminal half	Dual specificity phosphatase, catalytic domain, Protein-tyrosine phosphatase-like, Tyrosine-protein phosphatase CDC14, Tyrosine specific protein phosphatases domain, Dual specificity protein phosphatase domain, Protein-tyrosine phosphatase, active site, Protein-tyrosine phosphatase, catalytic, Dual specificity/tyrosine protein phosphatase, N-terminal	GO:0008138|GO:0016311|GO:0004721|GO:0006470|GO:0007096|GO:0016311|GO:0016791|GO:0006470|GO:0008138|GO:0004725|GO:0016311			Tyrosine specific protein phosphatases domain	Dual specificity protein phosphatase domain, Protein-tyrosine phosphatase, catalytic	Protein-tyrosine phosphatase-like, Protein-tyrosine phosphatase-like		Tyrosine-protein phosphatase CDC14
g903	1	3194884	3196683			1	1					501	1.8	Prion-inhibition and propagation	Prion-inhibition and propagation, HeLo domain, HeLo domain superfamily, Protein kinase domain, Protein kinase-like domain superfamily	GO:0004672|GO:0005524|GO:0006468			Protein kinase domain		Protein kinase-like domain superfamily
g904	1	3197096	3201200		13		7	7	11			1345	0.82	ABC transporter transmembrane region, ABC transporter transmembrane region, ABC transporter, ABC transporter	AAA+ ATPase domain, ABC transporter, conserved site, P-loop containing nucleoside triphosphate hydrolase, ABC transporter type 1, transmembrane domain, ABC transporter-like, Type I protein exporter, ABC transporter type 1, transmembrane domain superfamily	GO:0005524|GO:0016887|GO:0005524|GO:0016021|GO:0042626|GO:0055085|GO:0005524|GO:0016021			ABC transporter type 1, transmembrane domain, ABC transporter-like, ABC transporter type 1, transmembrane domain, ABC transporter-like	AAA+ ATPase domain, AAA+ ATPase domain	P-loop containing nucleoside triphosphate hydrolase, ABC transporter type 1, transmembrane domain superfamily, P-loop containing nucleoside triphosphate hydrolase, ABC transporter type 1, transmembrane domain superfamily		Type I protein exporter
g905	1	3203227	3207609									1460	1.71	PIF1-like helicase, Helitron helicase-like domain at N-terminus	DNA helicase Pif1-like, Helitron helicase-like domain, P-loop containing nucleoside triphosphate hydrolase	GO:0000723|GO:0003678|GO:0006281					P-loop containing nucleoside triphosphate hydrolase, P-loop containing nucleoside triphosphate hydrolase
g906	1	3208493	3209077									194	1.03	Acetyltransferase (GNAT) domain	GNAT domain, Acyl-CoA N-acyltransferase	GO:0008080			GNAT domain		Acyl-CoA N-acyltransferase
g907	1	3210723	3212657		14		7	8	14			609	1.15		MFS transporter superfamily, Tetracycline resistance protein/drug resistance transporter, Major facilitator superfamily domain	GO:0022857			Major facilitator superfamily domain		MFS transporter superfamily		Tetracycline resistance protein/drug resistance transporter
g908	1	3214278	3215373		8		4	5	7			302	0.66	SURF4 family	Surfeit locus 4	GO:0016021	Reactome: R-HSA-6798695|Reactome: R-HSA-6811434
g909	1	3216369	3217955									528	1.14		DNA glycosylase	GO:0003824|GO:0006281	Reactome: R-HSA-110357				DNA glycosylase
g910	1	3219414	3220182									116	0.86	RNA recognition motif. (a.k.a. RRM, RBD, or RNP domain)	RNA recognition motif domain, RNA-binding domain superfamily, SF3B6, RNA recognition motif, Nucleotide-binding alpha-beta plait domain superfamily	GO:0003676	Reactome: R-HSA-72163|Reactome: R-HSA-72165	SF3B6, RNA recognition motif	RNA recognition motif domain	RNA recognition motif domain	RNA-binding domain superfamily
g911	1	3222631	3223992									453	1.32	SWIM zinc finger	Zinc finger, SWIM-type	GO:0008270			Zinc finger, SWIM-type
g912	1	3224246	3226405									665	1.8		Protein kinase-like domain superfamily, Protein kinase domain	GO:0004672|GO:0005524|GO:0006468			Protein kinase domain		Protein kinase-like domain superfamily
g913	1	3231080	3234006		1		1	1	1			727	1.38
g914	1	3237106	3238540									385	1.04	Taurine catabolism dioxygenase TauD, TfdA family	Taurine dioxygenase TauD-like superfamily, TauD/TfdA-like domain	GO:0016491|GO:0055114	Reactome: R-HSA-71262
g915	1	3241097	3243132		1		1	1	1			593	1.18	Histidine phosphatase superfamily (branch 2)	Histidine acid phosphatase active site, Histidine phosphatase superfamily, clade-2, Histidine phosphatase superfamily			Histidine phosphatase superfamily, clade-2			Histidine phosphatase superfamily
g916	1	3243666	3245333		11		6	6	11			513	1.56	Ammonium Transporter Family	Ammonium/urea transporter, Ammonium transporter, Ammonium transporter AmtB-like domain, Ammonium transporter, conserved site	GO:0008519|GO:0016020|GO:0072488|GO:0008519|GO:0015696|GO:0016020						Ammonium transporter
g917	1	3249410	3251813									762	1.31	CRT10	Ribonucleotide reductase, transcriptional regulator Crt10
g918	1	3252878	3254924									432	1.62	Cellulase (glycosyl hydrolase family 5)	Glycoside hydrolase superfamily, Glycoside hydrolase, family 5	GO:0004553|GO:0005975					Glycoside hydrolase superfamily
g919	1	3255845	3257486		7		4	4	7			489	3.07	7 transmembrane receptor (Secretin family)	GPCR, family 2, secretin-like, GPCR, family 2-like	GO:0004930|GO:0007186|GO:0016021|GO:0004888|GO:0007166|GO:0016021			GPCR, family 2-like
g920	1	3265394	3266386									313	0.64	Dihydroneopterin aldolase	Dihydroneopterin aldolase/epimerase domain, GTP cyclohydrolase I, C-terminal/NADPH-dependent 7-cyano-7-deazaguanine reductase	GO:0004150|GO:0006760	KEGG: 00790+4.1.2.25|MetaCyc: PWY-6147|MetaCyc: PWY-6148|MetaCyc: PWY-6797|MetaCyc: PWY-7539, Reactome: R-HSA-1474151			Dihydroneopterin aldolase/epimerase domain
g921	1	3266642	3267369									224	0.45	Protein of unknown function (DUF3605)	Protein of unknown function DUF3605								Protein of unknown function DUF3605
g922	1	3270105	3272195									521	0.38	UTP--glucose-1-phosphate uridylyltransferase	UTP--glucose-1-phosphate uridylyltransferase, Nucleotide-diphospho-sugar transferases, UDPGP family	GO:0003983|GO:0006011|GO:0070569	KEGG: 00040+2.7.7.9|KEGG: 00052+2.7.7.9|KEGG: 00500+2.7.7.9|KEGG: 00520+2.7.7.9|KEGG: 00561+2.7.7.9|MetaCyc: PWY-3801|MetaCyc: PWY-6527|MetaCyc: PWY-7238|MetaCyc: PWY-7343|MetaCyc: PWY-7817|Reactome: R-HSA-173599|Reactome: R-HSA-3322077	UTP--glucose-1-phosphate uridylyltransferase			Nucleotide-diphospho-sugar transferases
g923	1	3276222	3277662		1		1	1				293	1.02	Ser-Thr-rich glycosyl-phosphatidyl-inositol-anchored membrane family	Kre9/Knh1 family
g924	1	3279239	3279811									190	1.05
g925	1	3281596	3283508									579	0.86	Patatin-like phospholipase, Domain of unknown function (DUF3336)	Patatin-like phospholipase domain, Acyl transferase/acyl hydrolase/lysophospholipase, Triacylglycerol lipase	GO:0006629|GO:0004806|GO:0006629			Patatin-like phospholipase domain		Acyl transferase/acyl hydrolase/lysophospholipase
g926	1	3284188	3285467									407		Leo1-like protein	Leo1-like protein	GO:0006368|GO:0016570|GO:0016593	Reactome: R-HSA-112382|Reactome: R-HSA-201722|Reactome: R-HSA-674695|Reactome: R-HSA-75955|Reactome: R-HSA-8866654						Leo1-like protein
g927	1	3286792	3288215									379	1.32	Mob1/phocein family	MOB kinase activator superfamily, MOB kinase activator family					MOB kinase activator family	MOB kinase activator superfamily		MOB kinase activator family
g928	1	3288674	3289475									174	0.57	Protein of unknown function (DUF3237)
g929	1	3297723	3299629		1		1	1				612	0.65	bZIP transcription factor	Basic-leucine zipper domain	GO:0003700|GO:0006355			Basic-leucine zipper domain	Basic-leucine zipper domain
g930	1	3301940	3303775									399	1.5	Sel1 repeat, Sel1 repeat, Sel1 repeat	Tetratricopeptide-like helical domain superfamily, Sel1-like repeat	GO:0005515				Sel1-like repeat, Sel1-like repeat, Sel1-like repeat
g931	1	3304882	3306425									449	3.34		Zinc finger, CCCH-type, Zinc finger, CCCH-type superfamily	GO:0046872			Zinc finger, CCCH-type, Zinc finger, CCCH-type, Zinc finger, CCCH-type, Zinc finger, CCCH-type	Zinc finger, CCCH-type, Zinc finger, CCCH-type, Zinc finger, CCCH-type, Zinc finger, CCCH-type	Zinc finger, CCCH-type superfamily, Zinc finger, CCCH-type superfamily
g932	1	3306853	3307917									354	0.56	Tho complex subunit 7	THO complex subunit 7/Mft1	GO:0000445|GO:0006397	Reactome: R-HSA-159236|Reactome: R-HSA-72187|Reactome: R-HSA-73856
g933	1	3308068	3308484									118		Tubulin binding cofactor A	Tubulin binding cofactor A, Tubulin binding cofactor A superfamily	GO:0007021|GO:0007023|GO:0048487	Reactome: R-HSA-389977				Tubulin binding cofactor A superfamily		Tubulin binding cofactor A
g934	1	3309073	3310978									617	0.49	Conserved region of Rad21 / Rec8 like protein, N terminus of Rad21 / Rec8 like protein	Rad21/Rec8-like protein, C-terminal, eukaryotic, ScpA-like, C-terminal, Winged helix DNA-binding domain superfamily, Rad21/Rec8-like protein, Rad21/Rec8-like protein, N-terminal	GO:0007062|GO:0008278|GO:0005515	Reactome: R-HSA-1221632				Winged helix DNA-binding domain superfamily		Rad21/Rec8-like protein
g935	1	3312537	3320912		5		3	3	2			2205	0.73	Cation transporting ATPase, C-terminus, E1-E2 ATPase, COG4 transport protein, haloacid dehalogenase-like hydrolase, Putative GTP-binding controlling metal-binding, Telomere recombination, Cation transporter/ATPase, N-terminus	P-type ATPase, phosphorylation site, Cation-transporting P-type ATPase, C-terminal, Conserved oligomeric Golgi complex, subunit 4, HAD-like superfamily, Cation-transporting P-type ATPase, N-terminal, YrdC-like domain, P-type ATPase, A domain superfamily, P-type ATPase, P-type ATPase, cytoplasmic domain N, Putative GTP-binding controlling metal-binding domain, DHBP synthase RibB-like alpha/beta do…	GO:0003725|GO:0016021|GO:0000166	Reactome: R-HSA-936837, Reactome: R-HSA-6807878|Reactome: R-HSA-6811438|Reactome: R-HSA-6811440		YrdC-like domain	Cation-transporting P-type ATPase, N-terminal, Conserved oligomeric Golgi complex, subunit 4	HAD-like superfamily, P-type ATPase, A domain superfamily, P-type ATPase, cytoplasmic domain N, DHBP synthase RibB-like alpha/beta domain superfamily, P-type ATPase, transmembrane domain superfamily	YrdC-like domain, P-type ATPase, P-type ATPase
g936	1	3321106	3321838			1	1					197		Clathrin adaptor complex small chain	AP complex, mu/sigma subunit, Longin-like domain superfamily, Coatomer subunit zeta	GO:0006890|GO:0030126	Reactome: R-HSA-6807878|Reactome: R-HSA-6811434				Longin-like domain superfamily		Coatomer subunit zeta
g937	1	3322206	3325353									1015	1.08	MCM OB domain, MCM P-loop domain, MCM N-terminal domain, MCM AAA-lid domain	MCM domain, Mini-chromosome maintenance protein, MCM OB domain, Mini-chromosome maintenance, conserved site, Mini-chromosome maintenance complex protein 4, P-loop containing nucleoside triphosphate hydrolase, MCM N-terminal domain, Nucleic acid-binding, OB-fold, MCM, AAA-lid domain	GO:0003677|GO:0005524|GO:0006270|GO:0003677|GO:0005524|GO:0006260|GO:0003677|GO:0003678|GO:0005524|GO:0006270|GO:0042555	Reactome: R-HSA-176187|Reactome: R-HSA-176974|Reactome: R-HSA-68867|Reactome: R-HSA-68949|Reactome: R-HSA-68962, Reactome: R-HSA-176187|Reactome: R-HSA-176974|Reactome: R-HSA-68867|Reactome: R-HSA-68949|Reactome: R-HSA-68962|Reactome: R-HSA-69052		MCM domain	Mini-chromosome maintenance protein	P-loop containing nucleoside triphosphate hydrolase, Nucleic acid-binding, OB-fold		Mini-chromosome maintenance complex protein 4, Mini-chromosome maintenance protein
g938	1	3325561	3327333									555	0.72	Cys/Met metabolism PLP-dependent enzyme	Pyridoxal phosphate-dependent transferase domain 1, Pyridoxal phosphate-dependent transferase, major domain, Cys/Met metabolism, pyridoxal phosphate-dependent enzyme, Pyridoxal phosphate-dependent transferase	GO:0003824|GO:0019346|GO:0030170	Reactome: R-HSA-1614558|Reactome: R-HSA-1614603|Reactome: R-HSA-2408508				Pyridoxal phosphate-dependent transferase
g939	1	3328212	3330740		3		2	2	3			806	0.25	VTC domain, Domain of unknown function (DUF202)	SPX domain, VTC domain, Domain of unknown function DUF202				SPX domain
g940	1	3332232	3333568									427	1.87		Arginine N-methyltransferase 2-like domain, Ankyrin repeat-containing domain superfamily, S-adenosyl-L-methionine-dependent methyltransferase, Arginine N-methyltransferase 2	GO:0016274	Reactome: R-HSA-71288|Reactome: R-HSA-8986944		Arginine N-methyltransferase 2-like domain		Ankyrin repeat-containing domain superfamily, S-adenosyl-L-methionine-dependent methyltransferase
g941	1	3333755	3335406									481	2.08	Hexokinase, Hexokinase	Hexokinase, binding site, Hexokinase, ATPase, nucleotide binding domain, Hexokinase, N-terminal, Hexokinase, C-terminal	GO:0004396|GO:0005524|GO:0006096|GO:0001678|GO:0004396|GO:0005524|GO:0005536|GO:0005975|GO:0005524|GO:0005975|GO:0016773	KEGG: 00010+2.7.1.1|KEGG: 00051+2.7.1.1|KEGG: 00052+2.7.1.1|KEGG: 00500+2.7.1.1|KEGG: 00520+2.7.1.1|KEGG: 00521+2.7.1.1|KEGG: 00524+2.7.1.1|Reactome: R-HSA-70171		Hexokinase		ATPase, nucleotide binding domain, ATPase, nucleotide binding domain		Hexokinase
g942	1	3337556	3339161	1	1	1	1	1	1			499		Ribophorin I	Ribophorin I	GO:0005783|GO:0006486|GO:0016021	Reactome: R-HSA-1799339|Reactome: R-HSA-446203						Ribophorin I
g943	1	3340714	3342287									320	0.31	Eisosome component PIL1	Eisosome component PIL1/LSP1, AH/BAR domain superfamily								Eisosome component PIL1/LSP1
g944	1	3343500	3344903									362	1.1	Inorganic pyrophosphatase	Inorganic pyrophosphatase superfamily, Inorganic pyrophosphatase	GO:0000287|GO:0004427|GO:0005737|GO:0006796	KEGG: 00190+3.6.1.1|MetaCyc: PWY-7805|MetaCyc: PWY-7807|Reactome: R-HSA-71737	Inorganic pyrophosphatase			Inorganic pyrophosphatase superfamily		Inorganic pyrophosphatase
g945	1	3345142	3345493									97	2.06	39S ribosomal protein L53/MRP-L53	Ribosomal protein L53, mitochondrial, Thioredoxin-like superfamily, 54S ribosomal protein L44, mitochondrial		Reactome: R-HSA-5368286|Reactome: R-HSA-5389840|Reactome: R-HSA-5419276						54S ribosomal protein L44, mitochondrial
g946	1	3345785	3346993		1		1	1				385	0.52	Sec20	Sec20	GO:0005484|GO:0006890	Reactome: R-HSA-6811434						Sec20
g947	1	3347404	3348443									255	2.75	Class II Aldolase and Adducin N-terminal domain	Class II aldolase/adducin N-terminal domain superfamily, Methylthioribulose-1-phosphate dehydratase, eukaryotes, Methylthioribulose-1-phosphate dehydratase, Class II aldolase/adducin N-terminal	GO:0005737|GO:0019509|GO:0046872	KEGG: 00270+4.2.1.109|MetaCyc: PWY-4361|Reactome: R-HSA-111458|Reactome: R-HSA-1237112|Reactome: R-HSA-9627069			Class II aldolase/adducin N-terminal	Class II aldolase/adducin N-terminal domain superfamily	Methylthioribulose-1-phosphate dehydratase	Methylthioribulose-1-phosphate dehydratase
g948	1	3351828	3352477	1	1	1	1	1		Non-effector	0.94	197	4.06
g949	1	3354099	3355945		1	1	1	1	1			561	0.71	Calreticulin family	Concanavalin A-like lectin/glucanase domain superfamily, Calreticulin/calnexin, conserved site, Calreticulin/calnexin, P domain superfamily, Calreticulin/calnexin	GO:0005509|GO:0005509|GO:0005515|GO:0005509|GO:0005783|GO:0006457|GO:0051082					Concanavalin A-like lectin/glucanase domain superfamily, Calreticulin/calnexin, P domain superfamily, Concanavalin A-like lectin/glucanase domain superfamily		Calreticulin/calnexin
g950	1	3357006	3358769									570	0.88	Aldehyde dehydrogenase family	Aldehyde dehydrogenase, C-terminal, Aldehyde dehydrogenase, N-terminal, Aldehyde/histidinol dehydrogenase, Methylmalonate-semialdehyde dehydrogenase, Aldehyde dehydrogenase, cysteine active site, Aldehyde dehydrogenase domain	GO:0016491|GO:0016620|GO:0055114|GO:0016491|GO:0055114|GO:0004491|GO:0055114	KEGG: 00280+1.2.1.27|KEGG: 00640+1.2.1.27|MetaCyc: PWY-5642|Reactome: R-HSA-70895	Methylmalonate-semialdehyde dehydrogenase			Aldehyde/histidinol dehydrogenase	Methylmalonate-semialdehyde dehydrogenase	Methylmalonate-semialdehyde dehydrogenase
g951	1	3359811	3361927									648	1.08	Phenol hydroxylase, C-terminal dimerisation domain, FAD binding domain	Phenol hydroxylase, C-terminal dimerisation domain, FAD/NAD(P)-binding domain superfamily, FAD-binding domain, Thioredoxin-like superfamily, Phenol hydroxylase, C-terminal TRX-fold domain superfamily	GO:0071949					FAD/NAD(P)-binding domain superfamily, Thioredoxin-like superfamily
g952	1	3365242	3366452									378	0.53	short chain dehydrogenase	Short-chain dehydrogenase/reductase SDR, NAD(P)-binding domain superfamily						NAD(P)-binding domain superfamily
g953	1	3367180	3368027	1		1	1			Non-effector	0.896	245	0.82
g954	1	3369201	3371670									752	0.8	Indigoidine synthase A like protein, pfkB family carbohydrate kinase, pfkB family carbohydrate kinase	Pseudouridine-5'-phosphate glycosidase, Indigoidine synthase A-like, Ribokinase-like, Carbohydrate kinase PfkB	GO:0016798	KEGG: 00240+4.2.1.70|MetaCyc: PWY-6019				Ribokinase-like, Indigoidine synthase A-like		Pseudouridine-5'-phosphate glycosidase
g955	1	3372186	3373907									573	0.52		WD40-repeat-containing domain, WD40-repeat-containing domain superfamily, WD40/YVTN repeat-like-containing domain superfamily, WD40 repeat	GO:0005515			WD40-repeat-containing domain, WD40 repeat	WD40 repeat, WD40 repeat, WD40 repeat, WD40 repeat	WD40-repeat-containing domain superfamily
g956	1	3374029	3374488									136	2.21
g957	1	3378964	3382716									1234	0.97
g958	1	3383091	3383843									250	0.8	short chain dehydrogenase	Short-chain dehydrogenase/reductase SDR, NAD(P)-binding domain superfamily						NAD(P)-binding domain superfamily
g959	1	3384378	3385145									221		DNA replication complex GINS protein SLD5 C-terminus, GINS complex protein	DNA replication complex GINS protein SLD5, C-terminal, GINS complex subunit Sld5, GINS, helical bundle-like domain superfamily, GINS subunit, domain A, GINS complex protein Sld5, alpha-helical domain	GO:0006261	Reactome: R-HSA-176974	GINS complex protein Sld5, alpha-helical domain			GINS, helical bundle-like domain superfamily		GINS complex subunit Sld5
g960	1	3385595	3386353		6		3	4	6			235	0.43	FAR-17a/AIG1-like protein	FAR-17a/AIG1-like protein	GO:0016021							FAR-17a/AIG1-like protein
g961	1	3386781	3389077									648	0.77	WD domain, G-beta repeat, Cyclophilin type peptidyl-prolyl cis-trans isomerase/CLD	Cyclophilin-like domain superfamily, WD40/YVTN repeat-like-containing domain superfamily, WD40 repeat, Cyclophilin-type peptidyl-prolyl cis-trans isomerase, conserved site, Cyclophilin-type peptidyl-prolyl cis-trans isomerase domain, WD40-repeat-containing domain, WD40-repeat-containing domain superfamily	GO:0005515|GO:0003755|GO:0006457|GO:0000413|GO:0003755			WD40 repeat, WD40 repeat, Cyclophilin-type peptidyl-prolyl cis-trans isomerase domain, WD40-repeat-containing domain	WD40 repeat, WD40 repeat, WD40 repeat, WD40 repeat	Cyclophilin-like domain superfamily, WD40-repeat-containing domain superfamily
g962	1	3392577	3393882									372	1.34	DAHP synthetase I family	Aldolase-type TIM barrel, DHAP synthase, class 1, DAHP synthetase I/KDSA	GO:0003824|GO:0003849|GO:0009073|GO:0009058	KEGG: 00400+2.5.1.54|MetaCyc: PWY-6164, KEGG: 00540+2.5.1.55|MetaCyc: PWY-1269|MetaCyc: PWY-7674					DHAP synthase, class 1	DHAP synthase, class 1
g963	1	3394487	3395650									367	2.18	Zinc finger, C2H2 type	Zinc finger C2H2-type, Zinc finger C2H2 superfamily				Zinc finger C2H2-type	Zinc finger C2H2-type, Zinc finger C2H2-type, Zinc finger C2H2-type	Zinc finger C2H2 superfamily
g964	1	3395919	3396589		4		2	3	3			172	1.74
g965	1	3397376	3399106									576	1.91	Iron only hydrogenase large subunit, C-terminal domain	Iron hydrogenase, large subunit, C-terminal, Iron hydrogenase						Iron hydrogenase
g966	1	3399132	3400042									282		SUZ domain	SUZ domain				SUZ domain
g967	1	3400790	3401093									82
g968	1	3406204	3408940									893	0.67	Protein kinase domain, Protein kinase C terminal domain, C2 domain	Protein kinase domain, AGC-kinase, C-terminal, Protein kinase-like domain superfamily, C2 domain, Serine/threonine-protein kinase, active site, Protein kinase, ATP binding site, Protein kinase, C-terminal	GO:0004672|GO:0005524|GO:0006468|GO:0004674|GO:0005524|GO:0006468|GO:0004672|GO:0006468|GO:0005524			AGC-kinase, C-terminal, Protein kinase domain	Protein kinase domain, AGC-kinase, C-terminal, C2 domain	Protein kinase-like domain superfamily
g969	1	3410071	3410808									128		ATP synthase complex subunit h	ATP synthase, F0 complex, subunit H	GO:0000276|GO:0015986							ATP synthase, F0 complex, subunit H
g970	1	3411572	3412871	1	5	1	3	3	4			391	1.28	Cytochrome domain of cellobiose dehydrogenase, Domain of unknown function (DUF2427)	Cellobiose dehydrogenase, cytochrome domain, Cytochrome b561/ferric reductase transmembrane, DOMON domain, Domain of unknown function DUF2427, CHD, cytochrome domain superfamily			Cellobiose dehydrogenase, cytochrome domain		Cytochrome b561/ferric reductase transmembrane, DOMON domain
g971	1	3415193	3416740									515	0.97	Protein kinase domain	Protein kinase domain, Protein kinase-like domain superfamily, AGC-kinase, C-terminal, Serine/threonine-protein kinase, active site	GO:0004672|GO:0005524|GO:0006468|GO:0004674|GO:0005524|GO:0006468|GO:0004672|GO:0006468			Protein kinase domain, AGC-kinase, C-terminal	Protein kinase domain, AGC-kinase, C-terminal	Protein kinase-like domain superfamily
g972	1	3418448	3420007									519	0.39	WD domain, G-beta repeat, WD domain, G-beta repeat, WD domain, G-beta repeat, WD domain, G-beta repeat, WD domain, G-beta repeat, pre-mRNA processing factor 4 (PRP4) like	WD40 repeat, Pre-mRNA processing factor 4 (PRP4)-like, WD40 repeat, conserved site, WD40/YVTN repeat-like-containing domain superfamily, WD40-repeat-containing domain superfamily, PRP4-like superfamily, G-protein beta WD-40 repeat, WD40-repeat-containing domain	GO:0005515			WD40 repeat, WD40 repeat, WD40 repeat, WD40 repeat, WD40 repeat, WD40-repeat-containing domain	Pre-mRNA processing factor 4 (PRP4)-like, WD40 repeat, WD40 repeat, WD40 repeat, WD40 repeat, WD40 repeat, WD40 repeat, WD40 repeat	WD40-repeat-containing domain superfamily, PRP4-like superfamily
g973	1	3420510	3421953		1		1	1	1			443	1.13	Cyclin, N-terminal domain	Cyclin/Cyclin-like subunit Ssn8, Cyclin-like, Cyclin-like superfamily, Cyclin, N-terminal	GO:0006357|GO:0016538|GO:0042025		Cyclin-like		Cyclin-like	Cyclin-like superfamily, Cyclin-like superfamily		Cyclin/Cyclin-like subunit Ssn8
g974	1	3423968	3424381									99	2.02	LSM domain	LSM domain superfamily, Sm-like protein Lsm8, LSM domain, eukaryotic/archaea-type	GO:0000398|GO:0005688|GO:0046540	Reactome: R-HSA-72163	Sm-like protein Lsm8		LSM domain, eukaryotic/archaea-type	LSM domain superfamily
g975	1	3424632	3426098									432	0.93	Inosine-uridine preferring nucleoside hydrolase	Inosine/uridine-preferring nucleoside hydrolase, Inosine/uridine-preferring nucleoside hydrolase domain, Ribonucleoside hydrolase-like						Ribonucleoside hydrolase-like		Inosine/uridine-preferring nucleoside hydrolase
g976	1	3428156	3429358			1	1		1			400
g977	1	3432771	3434196									202	0.5
g978	1	3435634	3436860			1	1					408	0.49
g979	1	3437515	3438120									201	0.5		Translation machinery-associated protein 17	GO:0070682							Translation machinery-associated protein 17
g980	1	3438445	3440130		8		4	5	6			561	1.25	Rhomboid family	Peptidase S54, rhomboid domain, Rhomboid-like superfamily	GO:0004252|GO:0016021
g981	1	3442202	3442894									199	2.01	DDE superfamily endonuclease	Tc1-like transposase, DDE domain
g982	1	3443894	3445771									625	1.44	Sir2 family	Sirtuin family, DHS-like NAD/FAD-binding domain superfamily, Sirtuin, catalytic core small domain superfamily, Sirtuin family, catalytic core domain	GO:0070403	KEGG: 00760+2.3.1.286		Sirtuin family, catalytic core domain		DHS-like NAD/FAD-binding domain superfamily
g983	1	3446300	3447808									486	0.21	Ubiquitin-2 like Rad60 SUMO-like	Rad60/SUMO-like domain, Ubiquitin-like domain superfamily, Ubiquitin-like domain	GO:0005515			Ubiquitin-like domain		Ubiquitin-like domain superfamily
g984	1	3448307	3448702									83		LSM domain	Sm-like protein Lsm6/SmF, LSM domain, eukaryotic/archaea-type, LSM domain superfamily	GO:0000398|GO:0005732	Reactome: R-HSA-72163			LSM domain, eukaryotic/archaea-type	LSM domain superfamily		Sm-like protein Lsm6/SmF
g985	1	3448776	3449792									268	0.75	Methyltransferase domain	S-adenosyl-L-methionine-dependent methyltransferase, Methyltransferase type 11	GO:0008168					S-adenosyl-L-methionine-dependent methyltransferase
g986	1	3454141	3455160									241
g987	1	3456047	3457492									428	0.7	Cys/Met metabolism PLP-dependent enzyme	Cys/Met metabolism, pyridoxal phosphate-dependent enzyme, Pyridoxal phosphate-dependent transferase domain 1, Pyridoxal phosphate-dependent transferase, major domain, Pyridoxal phosphate-dependent transferase	GO:0019346|GO:0030170|GO:0003824	Reactome: R-HSA-1614558|Reactome: R-HSA-1614603|Reactome: R-HSA-2408508				Pyridoxal phosphate-dependent transferase		Cys/Met metabolism, pyridoxal phosphate-dependent enzyme
g988	1	3458043	3458733									211
g989	1	3460377	3461195			1	1		1			272	0.74	Polysaccharide deacetylase	Glycoside hydrolase/deacetylase, beta/alpha-barrel, NodB homology domain	GO:0003824|GO:0005975|GO:0005975|GO:0016810			NodB homology domain		Glycoside hydrolase/deacetylase, beta/alpha-barrel
g990	1	3463831	3464733									300	0.33
g991	1	3468066	3469745			1	1					540	0.74	WD domain, G-beta repeat, Nucleoporin Nup120/160	WD40 repeat, WD40-repeat-containing domain, WD40/YVTN repeat-like-containing domain superfamily, WD40-repeat-containing domain superfamily, WD40 repeat, conserved site, G-protein beta WD-40 repeat	GO:0005515			WD40-repeat-containing domain, WD40 repeat, WD40 repeat	WD40 repeat, WD40 repeat, WD40 repeat, WD40 repeat, WD40 repeat	WD40-repeat-containing domain superfamily
g992	1	3470259	3473183									974	1.13	Oligonucleotide/oligosaccharide-binding (OB)-fold, Helicase associated domain (HA2), DEAD/DEAH box helicase, Helicase conserved C-terminal domain	Helicase-associated domain, Domain of unknown function DUF1605, P-loop containing nucleoside triphosphate hydrolase, Helicase superfamily 1/2, ATP-binding domain, DNA/RNA helicase, ATP-dependent, DEAH-box type, conserved site, Helicase, C-terminal, DEAD/DEAH box helicase domain	GO:0004386|GO:0003676|GO:0005524			Helicase superfamily 1/2, ATP-binding domain, Helicase, C-terminal	Helicase-associated domain, Helicase, C-terminal, Helicase superfamily 1/2, ATP-binding domain	P-loop containing nucleoside triphosphate hydrolase
g993	1	3473649	3474133									91	1.1	Acylphosphatase	Acylphosphatase-like domain, Acylphosphatase, Acylphosphatase-like domain superfamily, Acylphosphatase, conserved site	GO:0003998	KEGG: 00620+3.6.1.7|KEGG: 00627+3.6.1.7		Acylphosphatase-like domain		Acylphosphatase-like domain superfamily		Acylphosphatase
g994	1	3474542	3475701									347		Hepatocellular carcinoma-associated antigen 59	Telomere length and silencing protein 1
g995	1	3476353	3478061									446	2.69
g996	1	3482927	3484074									283	0.71	EF hand, EF hand, EF-hand domain pair	EF-Hand 1, calcium-binding site, EF-hand domain, EF-hand domain pair	GO:0005509			EF-hand domain, EF-hand domain, EF-hand domain, EF-hand domain	EF-hand domain, EF-hand domain, EF-hand domain, EF-hand domain	EF-hand domain pair
g997	1	3484931	3486406									249	0.8	ChaC-like protein	Gamma-glutamyl cyclotransferase-like, Glutathione-specific gamma-glutamylcyclotransferase	GO:0003839|GO:0006751	KEGG: 00480+4.3.2.7|MetaCyc: PWY-7942|Reactome: R-HSA-174403	Gamma-glutamyl cyclotransferase-like					Glutathione-specific gamma-glutamylcyclotransferase
g998	1	3486926	3488892									195		RNA recognition motif. (a.k.a. RRM, RBD, or RNP domain)	RNA recognition motif domain, RNA-binding domain superfamily, Nucleotide-binding alpha-beta plait domain superfamily	GO:0003676			RNA recognition motif domain	RNA recognition motif domain	RNA-binding domain superfamily
g999	1	3492766	3493781									320	1.25	HpcH/HpaI aldolase/citrate lyase family	Pyruvate/Phosphoenolpyruvate kinase-like domain superfamily, HpcH/HpaI aldolase/citrate lyase domain, Pyruvate kinase-like domain superfamily, Citrate lyase beta subunit-like	GO:0003824					Pyruvate/Phosphoenolpyruvate kinase-like domain superfamily
g1000	1	3494245	3495032		4		2	3	3			194	0.52	Eukaryotic protein of unknown function (DUF846)	Golgi apparatus membrane protein TVP23-like	GO:0016021							Golgi apparatus membrane protein TVP23-like
g1001	1	3495757	3496995		1		1	1	1			389
g1002	1	3499693	3503248		4		3	2	2			1166	0.43	Protein of unknown function (DUF726)	Protein of unknown function DUF726, Alpha/Beta hydrolase fold						Alpha/Beta hydrolase fold		Protein of unknown function DUF726, Protein of unknown function DUF726
g1003	1	3504238	3505203									288	1.04	Fcf1	rRNA-processing protein Fcf1/Utp23, PIN-like domain superfamily	GO:0032040					PIN-like domain superfamily
g1004	1	3505637	3506892			1	1					381	2.36		Protein phosphatase 2C, PPM-type phosphatase domain superfamily, PPM-type phosphatase domain	GO:0003824	KEGG: 04658+3.1.3.16|KEGG: 04660+3.1.3.16|KEGG: 05235+3.1.3.16			PPM-type phosphatase domain	PPM-type phosphatase domain superfamily		Protein phosphatase 2C
g1005	1	3510483	3511405									76	1.32
g1006	1	3511785	3514646									711	0.56	PH domain	Pleckstrin homology domain, PH-like domain superfamily				Pleckstrin homology domain	Pleckstrin homology domain
g1007	1	3514811	3516646									611
g1008	1	3518103	3521795									1194	0.75	Protein kinase domain, FHA domain	Forkhead-associated (FHA) domain, Protein kinase, ATP binding site, SMAD/FHA domain superfamily, Protein kinase domain, Serine/threonine-protein kinase, active site, Protein kinase-like domain superfamily	GO:0005515|GO:0005524|GO:0004672|GO:0005524|GO:0006468|GO:0004672|GO:0006468		Forkhead-associated (FHA) domain	Forkhead-associated (FHA) domain, Protein kinase domain	Forkhead-associated (FHA) domain, Protein kinase domain	SMAD/FHA domain superfamily, Protein kinase-like domain superfamily
g1009	1	3523165	3525986									922	1.52
g1010	1	3527142	3529677		13		7	7	12			749	1.07	Oligosaccharyl transferase STT3 subunit	Oligosaccharyl transferase, STT3 subunit	GO:0004576|GO:0006486|GO:0016020
g1011	1	3530499	3531016									90		ATP synthase E chain	ATP synthase, F0 complex, subunit E, mitochondrial	GO:0000276|GO:0015078|GO:0015986	Reactome: R-HSA-163210|Reactome: R-HSA-8949613						ATP synthase, F0 complex, subunit E, mitochondrial
g1012	1	3531699	3533835									692	0.72		WD40-repeat-containing domain, WD40 repeat, WD40-repeat-containing domain superfamily, WD40/YVTN repeat-like-containing domain superfamily	GO:0005515			WD40-repeat-containing domain, WD40 repeat, WD40-repeat-containing domain	WD40 repeat, WD40 repeat, WD40 repeat, WD40 repeat, WD40 repeat	WD40-repeat-containing domain superfamily
g1013	1	3534446	3535537									329	1.22	Aldo/keto reductase family	NADP-dependent oxidoreductase domain, NADP-dependent oxidoreductase domain superfamily			NADP-dependent oxidoreductase domain			NADP-dependent oxidoreductase domain superfamily
g1014	1	3536081	3537031									316	1.27		Zinc finger, CCCH-type	GO:0046872			Zinc finger, CCCH-type
g1015	1	3537413	3539261									573	1.4	CAP-Gly domain	CAP Gly-rich domain superfamily, Leucine-rich repeat domain superfamily, CAP Gly-rich domain, Leucine-rich repeat, typical subtype				CAP Gly-rich domain	CAP Gly-rich domain, Leucine-rich repeat, typical subtype, Leucine-rich repeat, typical subtype	CAP Gly-rich domain superfamily
g1016	1	3540368	3541693									441	0.45		Stationary phase protein 5	GO:0070628							Stationary phase protein 5
g1017	1	3541887	3542815		1		1	1	1			73	1.37
g1018	1	3543421	3544836									471	1.91	Phosphatidylinositol-specific phospholipase C, X domain	PLC-like phosphodiesterase, TIM beta/alpha-barrel domain superfamily, Phosphatidylinositol-specific phospholipase C, X domain	GO:0006629|GO:0008081				Phosphatidylinositol-specific phospholipase C, X domain	PLC-like phosphodiesterase, TIM beta/alpha-barrel domain superfamily
g1019	1	3546722	3547342									206	1.94
g1020	1	3553308	3554698									403	0.99	S-adenosylmethionine synthetase, central domain, S-adenosylmethionine synthetase, C-terminal domain, S-adenosylmethionine synthetase, N-terminal domain	S-adenosylmethionine synthetase superfamily, S-adenosylmethionine synthetase, central domain, S-adenosylmethionine synthetase, conserved site, S-adenosylmethionine synthetase, S-adenosylmethionine synthetase, C-terminal, S-adenosylmethionine synthetase, N-terminal	GO:0004478|GO:0006556|GO:0004478|GO:0005524|GO:0006556	KEGG: 00270+2.5.1.6|MetaCyc: PWY-5041|MetaCyc: PWY-5912|Reactome: R-HSA-156581				S-adenosylmethionine synthetase superfamily, S-adenosylmethionine synthetase superfamily, S-adenosylmethionine synthetase superfamily	S-adenosylmethionine synthetase	S-adenosylmethionine synthetase
g1021	1	3556539	3557598									300	1	Conserved hypothetical ATP binding protein	P-loop containing nucleoside triphosphate hydrolase, GPN-loop GTPase, GPN-loop GTPase 3						P-loop containing nucleoside triphosphate hydrolase		GPN-loop GTPase, GPN-loop GTPase 3
g1022	1	3557964	3558503		2	1	2	1	2			179		Nuclear pore assembly and biogenesis	Nuclear pore assembly and biogenesis protein, APQ12
g1023	1	3559418	3561049									543	0.18
g1024	1	3561231	3562173									251	1.2
g1025	1	3564292	3565442									338	1.78	Tetrahydrofolate dehydrogenase/cyclohydrolase, catalytic domain, Tetrahydrofolate dehydrogenase/cyclohydrolase, NAD(P)-binding domain	NAD(P)-binding domain superfamily, Methylenetetrahydrofolate dehydrogenase, NAD-binding domain, Tetrahydrofolate dehydrogenase/cyclohydrolase, catalytic domain, Tetrahydrofolate dehydrogenase/cyclohydrolase, NAD(P)-binding domain, Tetrahydrofolate dehydrogenase/cyclohydrolase	GO:0004488|GO:0055114|GO:0004488	KEGG: 00670+1.5.1.15|MetaCyc: PWY-2201, KEGG: 00670+1.5.1.5+3.5.4.9|KEGG: 00720+1.5.1.5+3.5.4.9|MetaCyc: PWY-1722|MetaCyc: PWY-2201|MetaCyc: PWY-3841|MetaCyc: PWY-5030|MetaCyc: PWY-5497|MetaCyc: PWY-6613|MetaCyc: PWY-7909|Reactome: R-HSA-196757	Methylenetetrahydrofolate dehydrogenase, NAD-binding domain			NAD(P)-binding domain superfamily
g1026	1	3568185	3569861		10		5	6	12			513	2.53	Major Facilitator Superfamily	Major facilitator superfamily, Major facilitator superfamily domain, MFS transporter superfamily, Nitrate transporter	GO:0022857|GO:0055085|GO:0022857|GO:0015112|GO:0015113|GO:0015706|GO:0015707|GO:0016021			Major facilitator superfamily domain		MFS transporter superfamily	Nitrate transporter
g1027	1	3571628	3572473	1		1	1			Non-effector	0.905	262	0.38	Ser-Thr-rich glycosyl-phosphatidyl-inositol-anchored membrane family	Kre9/Knh1 family
g1028	1	3577629	3579151									490	1.63	WD domain, G-beta repeat, WD domain, G-beta repeat, WD domain, G-beta repeat, WD domain, G-beta repeat, WD domain, G-beta repeat, WD domain, G-beta repeat, WD domain, G-beta repeat	WD40 repeat, conserved site, WD40 repeat, WD40/YVTN repeat-like-containing domain superfamily, G-protein beta WD-40 repeat, WD40-repeat-containing domain, WD40-repeat-containing domain superfamily	GO:0005515			WD40 repeat, WD40 repeat, WD40-repeat-containing domain, WD40 repeat, WD40 repeat, WD40 repeat, WD40 repeat	WD40 repeat, WD40 repeat, WD40 repeat, WD40 repeat, WD40 repeat, WD40 repeat, WD40 repeat	WD40-repeat-containing domain superfamily
g1029	1	3579407	3581613									585	2.22	Hsp70 protein	ATPase, nucleotide binding domain, Heat shock protein 70 family		Reactome: R-HSA-3371453				ATPase, nucleotide binding domain, ATPase, nucleotide binding domain
g1030	1	3582309	3583794									478	1.05
g1031	1	3584432	3586121	1		1	1			Non-effector	0.991	546	0.55
g1032	1	3587246	3588298									350	0.29
g1033	1	3593244	3597318									1340	1.04	Protein kinase domain	Protein kinase domain, Protein kinase-like domain superfamily, Protein kinase, ATP binding site, Serine/threonine-protein kinase, active site, Mitogen-activated protein (MAP) kinase kinase kinase Ssk2/Ssk22	GO:0004672|GO:0005524|GO:0006468|GO:0005524|GO:0004672|GO:0006468|GO:0004709|GO:0005524|GO:0005737|GO:0051403			Protein kinase domain	Protein kinase domain	Protein kinase-like domain superfamily
g1034	1	3605579	3606672									307	1.3	Enoyl-(Acyl carrier protein) reductase	NAD(P)-binding domain superfamily, Short-chain dehydrogenase/reductase SDR						NAD(P)-binding domain superfamily
g1035	1	3608014	3609477	1	1	1	1	1	1			470	0.85		Histidine phosphatase superfamily						Histidine phosphatase superfamily
g1036	1	3609806	3611792		11		6	6	12			572	1.05	Major Facilitator Superfamily	MFS transporter superfamily, Major facilitator superfamily domain, Major facilitator superfamily	GO:0022857|GO:0022857|GO:0055085			Major facilitator superfamily domain		MFS transporter superfamily
g1037	1	3616121	3618815		1		1	1				692	2.17	Fungal Zn(2)-Cys(6) binuclear cluster domain	Zn(2)-C6 fungal-type DNA-binding domain, Zn(2)-C6 fungal-type DNA-binding domain superfamily	GO:0000981|GO:0006355|GO:0008270|GO:0042025		Zn(2)-C6 fungal-type DNA-binding domain	Zn(2)-C6 fungal-type DNA-binding domain	Zn(2)-C6 fungal-type DNA-binding domain	Zn(2)-C6 fungal-type DNA-binding domain superfamily
g1038	1	3620606	3623696									735	0.95
g1039	1	3625212	3627398			1	1					447	0.22
g1040	1	3628107	3630471									716	1.12	Domain of unknown function (DUF3453)	Armadillo-like helical, Symplekin/Pta1, Armadillo-type fold, Symplekin/Pta1, N-terminal		Reactome: R-HSA-159231|Reactome: R-HSA-72163|Reactome: R-HSA-72187|Reactome: R-HSA-73856|Reactome: R-HSA-77595				Armadillo-type fold		Symplekin/Pta1
g1041	1	3631080	3631417		1		1	1	1			74		Coiled-coil domain-containing protein 56	Cytochrome c oxidase assembly factor 3, mitochondrial, Cytochrome c oxidase assembly factor 3, mitochondrial, coiled-coil domain	GO:0033617							Cytochrome c oxidase assembly factor 3, mitochondrial
g1042	1	3631910	3633969									635	0.31	Sds3-like	Sds3-like					Sds3-like			Sds3-like
g1043	1	3634642	3636484									560	0.18	RNA recognition motif. (a.k.a. RRM, RBD, or RNP domain)	Nucleotide-binding alpha-beta plait domain superfamily, RNA recognition motif domain, RNA-binding domain superfamily, Nop12, RNA recognition motif 1	GO:0003676		Nop12, RNA recognition motif 1	RNA recognition motif domain	RNA recognition motif domain, RNA recognition motif domain	RNA-binding domain superfamily, RNA-binding domain superfamily
g1044	1	3637269	3638981									453	1.55	Tubulin/FtsZ family, GTPase domain, Tubulin C-terminal domain	Tubulin/FtsZ, 2-layer sandwich domain, Tubulin/FtsZ, GTPase domain, Tubulin, conserved site, Tubulin, Tubulin, C-terminal, Alpha tubulin, Tubulin/FtsZ, C-terminal, Tubulin/FtsZ, C-terminal domain superfamily, Tubulin/FtsZ, GTPase domain superfamily	GO:0003924|GO:0005525|GO:0005874|GO:0007017|GO:0005874|GO:0007017|GO:0005200|GO:0005525|GO:0005874|GO:0007017	Reactome: R-HSA-1445148|Reactome: R-HSA-190840|Reactome: R-HSA-190861|Reactome: R-HSA-2132295|Reactome: R-HSA-2467813|Reactome: R-HSA-2500257|Reactome: R-HSA-3371497|Reactome: R-HSA-380320|Reactome: R-HSA-437239|Reactome: R-HSA-5617833|Reactome: R-HSA-5626467|Reactome: R-HSA-5663220|Reactome: R-HSA-6807878|Reactome: R-HSA-6811434|Reactome: R-HSA-6811436|Reactome: R-HSA-68877|Reactome: R-HSA-88522…			Tubulin/FtsZ, 2-layer sandwich domain, Tubulin/FtsZ, GTPase domain	Tubulin/FtsZ, C-terminal, Tubulin/FtsZ, GTPase domain superfamily		Tubulin
g1045	1	3641666	3642841		7		4	4	7			292	2.4	Amino acid permease	Amino acid/polyamine transporter I	GO:0016020|GO:0022857|GO:0055085
g1046	1	3643460	3644919									422	0.95	FAD dependent oxidoreductase	FAD/NAD(P)-binding domain superfamily, FAD dependent oxidoreductase	GO:0016491|GO:0055114					FAD/NAD(P)-binding domain superfamily
g1047	1	3651070	3652239		1		1	1	1			373	1.61
g1048	1	3654419	3655219									152		Ribosomal protein S19	Ribosomal protein S19/S15, Ribosomal protein S19A/S15e, Ribosomal protein S19 conserved site, Ribosomal protein S19, superfamily	GO:0003735|GO:0005840|GO:0006412|GO:0003735|GO:0006412|GO:0015935|GO:0003723	Reactome: R-HSA-156827|Reactome: R-HSA-156902|Reactome: R-HSA-1799339|Reactome: R-HSA-192823|Reactome: R-HSA-2408557|Reactome: R-HSA-6791226|Reactome: R-HSA-72649|Reactome: R-HSA-72689|Reactome: R-HSA-72695|Reactome: R-HSA-72702|Reactome: R-HSA-72706|Reactome: R-HSA-72764|Reactome: R-HSA-9010553|Reactome: R-HSA-9633012|Reactome: R-HSA-975956|Reactome: R-HSA-975957				Ribosomal protein S19, superfamily	Ribosomal protein S19A/S15e	Ribosomal protein S19/S15
g1049	1	3656013	3656385									107
g1050	1	3656755	3657456									165			NADH-ubiquinone oxidoreductase 17.8kDa subunit	GO:0005739|GO:0055114	KEGG: 00190+1.6.99.3+7.1.1.2|MetaCyc: PWY-3781|MetaCyc: PWY-4302|MetaCyc: PWY-5083|MetaCyc: PWY-6692						NADH-ubiquinone oxidoreductase 17.8kDa subunit
g1051	1	3661065	3661391									108	7.41
g1052	1	3662992	3664128									378	1.85		NUDIX hydrolase-like domain superfamily	GO:0016787					NUDIX hydrolase-like domain superfamily
g1053	1	3664309	3664860									183	1.64	Cupin domain	Cupin 2, conserved barrel, RmlC-like jelly roll fold, RmlC-like cupin domain superfamily						RmlC-like cupin domain superfamily
g1054	1	3669566	3670990	1	1	1	1	1	1			416	2.88
g1055	1	3671312	3673020									541	2.77	Oxidoreductase family, NAD-binding Rossmann fold	NAD(P)-binding domain superfamily, Oxidoreductase, N-terminal	GO:0016491					NAD(P)-binding domain superfamily
g1056	1	3673525	3674218									214	2.34	Exonuclease	Ribonuclease H superfamily, Ribonuclease H-like superfamily, Exonuclease, RNase T/DNA polymerase III, Oligoribonuclease	GO:0003676|GO:0000175		Oligoribonuclease		Exonuclease, RNase T/DNA polymerase III	Ribonuclease H-like superfamily
g1057	1	3674836	3676805									553	0.72	Phosphoglucomutase/phosphomannomutase, alpha/beta/alpha domain II, Phosphoglucomutase/phosphomannomutase, C-terminal domain, Phosphoglucomutase/phosphomannomutase, alpha/beta/alpha domain III, Phosphoglucomutase/phosphomannomutase, alpha/beta/alpha domain I	Alpha-D-phosphohexomutase, alpha/beta/alpha domain II, Alpha-D-phosphohexomutase, C-terminal domain superfamily, Alpha-D-phosphohexomutase, C-terminal, Alpha-D-phosphohexomutase, alpha/beta/alpha domain III, Alpha-D-phosphohexomutase superfamily, Alpha-D-phosphohexomutase, alpha/beta/alpha I/II/III, Alpha-D-phosphohexomutase, conserved site, Alpha-D-phosphohexomutase, alpha/beta/alpha domain I	GO:0005975|GO:0016868|GO:0071704|GO:0005975|GO:0016868|GO:0000287	KEGG: 00520+5.4.2.10|MetaCyc: PWY-6749				Alpha-D-phosphohexomutase, C-terminal domain superfamily, Alpha-D-phosphohexomutase, alpha/beta/alpha I/II/III, Alpha-D-phosphohexomutase, alpha/beta/alpha I/II/III, Alpha-D-phosphohexomutase, alpha/beta/alpha I/II/III
g1058	1	3677302	3679211									479	2.51
g1059	1	3681537	3683843									134	0.75	HMG (high mobility group) box	High mobility group box domain, High mobility group box domain superfamily				High mobility group box domain	High mobility group box domain	High mobility group box domain superfamily
g1060	1	3686571	3687368									232		Centromere protein H (CENP-H)	Centromere protein H, C-terminal	GO:0000776|GO:0051382	Reactome: R-HSA-141444|Reactome: R-HSA-2467813|Reactome: R-HSA-2500257|Reactome: R-HSA-5663220|Reactome: R-HSA-606279|Reactome: R-HSA-68877|Reactome: R-HSA-9648025
g1061	1	3687745	3692055									1404	0.21	Autophagy-related protein 11	Autophagy-related protein 11, Autophagy-related protein 11, C-terminal	GO:0000045|GO:0000422	Reactome: R-HSA-1632852						Autophagy-related protein 11
g1062	1	3692947	3694145									362	1.93
g1063	1	3695027	3695614									195	0.51
g1064	1	3696586	3698451		1		1	1	1			621	1.29	Ubiquitin carboxyl-terminal hydrolase	Ubiquitin specific protease, conserved site, Ubiquitin specific protease domain, Papain-like cysteine peptidase superfamily, Peptidase C19, ubiquitin carboxyl-terminal hydrolase	GO:0006511|GO:0036459|GO:0016579|GO:0036459			Ubiquitin specific protease domain		Papain-like cysteine peptidase superfamily
g1065	1	3699385	3700794		1		1	1	1			454	1.32	PAN domain	PAN/Apple domain
g1066	1	3704382	3707261									743	1.21	Fungal Zn(2)-Cys(6) binuclear cluster domain	Zn(2)-C6 fungal-type DNA-binding domain, Zn(2)-C6 fungal-type DNA-binding domain superfamily	GO:0000981|GO:0006355|GO:0008270|GO:0042025		Zn(2)-C6 fungal-type DNA-binding domain	Zn(2)-C6 fungal-type DNA-binding domain	Zn(2)-C6 fungal-type DNA-binding domain	Zn(2)-C6 fungal-type DNA-binding domain superfamily
g1067	1	3708624	3709241									205	2.44	Acetyltransferase (GNAT) domain	Acyl-CoA N-acyltransferase, GNAT domain	GO:0008080			GNAT domain		Acyl-CoA N-acyltransferase
g1068	1	3710140	3711647									468	1.5	Respiratory-chain NADH dehydrogenase, 49 Kd subunit	NAD(P)H-quinone oxidoreductase subunit D/H, NADH-quinone oxidoreductase, subunit D superfamily, NADH-quinone oxidoreductase, subunit D, [NiFe]-hydrogenase, large subunit, NADH:ubiquinone oxidoreductase, 49kDa subunit, conserved site	GO:0016651|GO:0055114|GO:0016651|GO:0048038|GO:0051287|GO:0055114	Reactome: R-HSA-611105|Reactome: R-HSA-6799198				[NiFe]-hydrogenase, large subunit	NAD(P)H-quinone oxidoreductase subunit D/H
g1069	1	3711898	3713409									487	1.03	FAD binding domain	Ubiquinone biosynthesis hydroxylase UbiH/COQ6, FAD/NAD(P)-binding domain superfamily, Ubiquinone biosynthesis hydroxylase, UbiH/UbiF/VisC/COQ6, conserved site, Ubiquinone biosynthesis monooxygenase COQ6, FAD-binding domain	GO:0006744|GO:0016709|GO:0050660|GO:0055114|GO:0016709|GO:0055114|GO:0004497|GO:0055114|GO:0071949	Reactome: R-HSA-2142789				FAD/NAD(P)-binding domain superfamily	Ubiquinone biosynthesis hydroxylase UbiH/COQ6
g1070	1	3714046	3716174		2		2	1	1			671	1.19	HeH/LEM domain, Man1-Src1p-C-terminal domain	HeH/LEM domain, Man1/Src1, C-terminal		Reactome: R-HSA-2980766|Reactome: R-HSA-2995383|Reactome: R-HSA-4419969
g1071	1	3716790	3717723			1	1					242		Mitochondrial ATP synthase B chain precursor (ATP-synt_B)	ATP synthase, F0 complex, subunit B/MI25, ATP synthase, F0 complex, subunit B	GO:0000276|GO:0015078|GO:0015986	Reactome: R-HSA-163210|Reactome: R-HSA-8949613						ATP synthase, F0 complex, subunit B
g1072	1	3718073	3719841		2		1	2				549	1.09	CBF/Mak21 family	Nucleolar complex protein 4, CCAAT-binding factor	GO:0042254	Reactome: R-HSA-6790901|Reactome: R-HSA-6791226						Nucleolar complex protein 4
g1073	1	3721207	3723813		2		1	2	1			833	0.6	CorA-like Mg2+ transporter protein
g1074	1	3724791	3725789									293	0.34	Transcription termination and cleavage factor C-terminal, Hinge domain of cleavage stimulation factor subunit 2, RNA recognition motif. (a.k.a. RRM, RBD, or RNP domain)	Transcription termination and cleavage factor, C-terminal domain, RNA recognition motif domain, Cleavage stimulation factor subunit 2, hinge domain, Nucleotide-binding alpha-beta plait domain superfamily, CSTF2, C-terminal domain superfamily, RNA-binding domain superfamily	GO:0031124|GO:0003676	Reactome: R-HSA-72163|Reactome: R-HSA-72187|Reactome: R-HSA-73856|Reactome: R-HSA-77595		RNA recognition motif domain	RNA recognition motif domain	RNA-binding domain superfamily
g1075	1	3726504	3727949		2		1	2	2			439	2.05	Endoplasmic reticulum vesicle transporter, Endoplasmic Reticulum-Golgi Intermediate Compartment (ERGIC)	Endoplasmic reticulum vesicle transporter, C-terminal, Endoplasmic reticulum vesicle transporter, N-terminal
g1076	1	3732231	3734553									735	0.82	Sel1 repeat, Sel1 repeat, Sel1 repeat	Tetratricopeptide-like helical domain superfamily, Sel1-like repeat	GO:0005515				Sel1-like repeat, Sel1-like repeat, Sel1-like repeat
g1077	1	3735150	3736060									270	1.48	Proteasome subunit, Proteasome beta subunits C terminal	Proteasome, subunit alpha/beta, Nucleophile aminohydrolases, N-terminal, Proteasome B-type subunit, Proteasome beta subunit, C-terminal, Peptidase T1A, proteasome beta-subunit, Proteasome subunit beta 7	GO:0004298|GO:0005839|GO:0051603|GO:0004298|GO:0004175|GO:0005839|GO:0051603	Reactome: R-HSA-1169091|Reactome: R-HSA-1234176|Reactome: R-HSA-1236974|Reactome: R-HSA-1236978|Reactome: R-HSA-174084|Reactome: R-HSA-174113|Reactome: R-HSA-174154|Reactome: R-HSA-174178|Reactome: R-HSA-174184|Reactome: R-HSA-180534|Reactome: R-HSA-180585|Reactome: R-HSA-187577|Reactome: R-HSA-195253|Reactome: R-HSA-202424|Reactome: R-HSA-211733|Reactome: R-HSA-2467813|Reactome: R-HSA-2871837|Re…		Proteasome B-type subunit		Nucleophile aminohydrolases, N-terminal		Proteasome subunit beta 7
g1078	1	3736715	3741366									1499	0.47		WD40/YVTN repeat-like-containing domain superfamily, Nuclear pore complex protein	GO:0005515							Nuclear pore complex protein, Nuclear pore complex protein
g1079	1	3743185	3744384									381	1.05	RNA polymerase Rpb3/RpoA insert domain, RNA polymerase Rpb3/Rpb11 dimerisation domain	DNA-directed RNA polymerase, 30-40kDa subunit, conserved site, RNA polymerase, RBP11-like subunit, DNA-directed RNA polymerase, RpoA/D/Rpb3-type, DNA-directed RNA polymerases I and III subunit AC40, DNA-directed RNA polymerase, insert domain superfamily, DNA-directed RNA polymerase, insert domain	GO:0003677|GO:0003899|GO:0006351|GO:0006351|GO:0046983|GO:0003899|GO:0006351|GO:0003899|GO:0006351|GO:0046983	Reactome: R-HSA-1834949|Reactome: R-HSA-427413|Reactome: R-HSA-5250924|Reactome: R-HSA-73762|Reactome: R-HSA-73772|Reactome: R-HSA-73780|Reactome: R-HSA-73863|Reactome: R-HSA-73980|Reactome: R-HSA-749476|Reactome: R-HSA-76061|Reactome: R-HSA-76066|Reactome: R-HSA-76071	DNA-directed RNA polymerases I and III subunit AC40		DNA-directed RNA polymerase, RpoA/D/Rpb3-type	RNA polymerase, RBP11-like subunit, DNA-directed RNA polymerase, insert domain superfamily		DNA-directed RNA polymerases I and III subunit AC40
g1080	1	3744653	3746187									435	2.53	ThiF family, E2 binding domain	THIF-type NAD/FAD binding fold, NEDD8-activating enzyme E1 catalytic subunit, Ubiquitin-activating enzyme, E2 binding, Ubiquitin activating enzyme, alpha domain superfamily	GO:0008641|GO:0019781|GO:0045116	Reactome: R-HSA-5607761|Reactome: R-HSA-5676590|Reactome: R-HSA-8951664|Reactome: R-HSA-983168			E2 binding	Ubiquitin-activating enzyme		NEDD8-activating enzyme E1 catalytic subunit
g1081	1	3747075	3749586		3		2	2				802	0.5	Telomere length regulation protein	TEL2, conserved domain superfamily, Telomere length regulation protein, conserved domain
g1082	1	3749775	3752294									839	0.6	Protein kinase domain	Serine/threonine-protein kinase, active site, Protein kinase domain, Protein kinase, ATP binding site, Protein kinase-like domain superfamily	GO:0004672|GO:0006468|GO:0004672|GO:0005524|GO:0006468|GO:0005524			Protein kinase domain	Protein kinase domain	Protein kinase-like domain superfamily
g1083	1	3754994	3757543									795	2.52	DNA repair metallo-beta-lactamase, Beta-lactamase superfamily domain	DNA repair metallo-beta-lactamase, Metallo-beta-lactamase, Ribonuclease Z/Hydroxyacylglutathione hydrolase-like						Ribonuclease Z/Hydroxyacylglutathione hydrolase-like
g1084	1	3757840	3758325									98		LSM domain	U6 snRNA-associated Sm-like protein LSm2, LSM domain, eukaryotic/archaea-type, LSM domain superfamily	GO:0006397	Reactome: R-HSA-430039|Reactome: R-HSA-72163|Reactome: R-HSA-72165	U6 snRNA-associated Sm-like protein LSm2		LSM domain, eukaryotic/archaea-type	LSM domain superfamily		U6 snRNA-associated Sm-like protein LSm2
g1085	1	3759013	3761643									839	0.95	Cullin protein neddylation domain, Cullin family	Cullin homology domain superfamily, Winged helix-like DNA-binding domain superfamily, Cullin protein, neddylation domain, Cullin repeat-like-containing domain superfamily, Cullin homology domain, Cullin, N-terminal, Winged helix DNA-binding domain superfamily	GO:0006511|GO:0031625	Reactome: R-HSA-8951664		Cullin homology domain	Cullin homology domain, Cullin protein, neddylation domain	Cullin homology domain superfamily, Cullin repeat-like-containing domain superfamily, Winged helix DNA-binding domain superfamily
g1086	1	3762313	3762844									123	0.81	LSM domain	LSM domain, eukaryotic/archaea-type, Small nuclear ribonucleoprotein D1, LSM domain superfamily, Like-Sm (LSM) domain containing protein, LSm4/SmD1/SmD3	GO:0000387|GO:0006396	Reactome: R-HSA-191859|Reactome: R-HSA-72163|Reactome: R-HSA-72165, Reactome: R-HSA-72163	Small nuclear ribonucleoprotein D1		LSM domain, eukaryotic/archaea-type	LSM domain superfamily		Like-Sm (LSM) domain containing protein, LSm4/SmD1/SmD3
g1087	1	3763109	3763873									254	1.57		S-adenosyl-L-methionine-dependent methyltransferase, DNA methylase, N-6 adenine-specific, conserved site	GO:0003676|GO:0008168|GO:0032259					S-adenosyl-L-methionine-dependent methyltransferase
g1088	1	3764848	3769121		9		5	5	6			1069	0.94	Phosphotransferase enzyme family	Acyl-CoA dehydrogenase family member 10/11, N-terminal, Aminoglycoside phosphotransferase, Serine/threonine-protein kinase, active site, Protein kinase-like domain superfamily	GO:0004672|GO:0006468	Reactome: R-HSA-77289	Acyl-CoA dehydrogenase family member 10/11, N-terminal			Protein kinase-like domain superfamily
g1089	1	3770165	3772621									752	0.66	GTPase-activator protein for Ras-like GTPase, RasGAP C-terminus	Ras GTPase-activating domain, Ras GTPase-activating protein, conserved site, RasGAP protein, C-terminal, Rho GTPase activation protein	GO:0043087|GO:0005515|GO:0007165	Reactome: R-HSA-5626467		Ras GTPase-activating domain	Ras GTPase-activating domain	Rho GTPase activation protein
g1090	1	3780197	3780945									184	0.54	Redoxin	Thioredoxin-like superfamily, Peroxiredoxin-5-like, Redoxin, Thioredoxin domain	GO:0016491	KEGG: 00480+1.11.1.15|Reactome: R-HSA-3299685|Reactome: R-HSA-5628897, Reactome: R-HSA-3299685|Reactome: R-HSA-5628897	Peroxiredoxin-5-like	Thioredoxin domain		Thioredoxin-like superfamily		Peroxiredoxin-5-like
g1091	1	3786282	3788127									96
g1092	1	3789551	3790459									302		CCAAT-binding transcription factor (CBF-B/NF-YA) subunit B	Nuclear transcription factor Y subunit A	GO:0003700|GO:0006355	Reactome: R-HSA-1989781|Reactome: R-HSA-2426168|Reactome: R-HSA-380994|Reactome: R-HSA-381183|Reactome: R-HSA-9614657		Nuclear transcription factor Y subunit A	Nuclear transcription factor Y subunit A			Nuclear transcription factor Y subunit A
g1093	1	3791682	3794152		2		1	2	2			773	0.52	CorA-like Mg2+ transporter protein
g1094	1	3795575	3796581									280	0.71	ASF1 like histone chaperone	Histone chaperone ASF1-like, Histone deposition protein Asf1, Histone chaperone ASF1-like superfamily	GO:0005634|GO:0006333|GO:0005634|GO:0006334|GO:0006337|GO:0016573|GO:0042393					Histone chaperone ASF1-like superfamily		Histone chaperone ASF1-like
g1095	1	3797857	3800984									992	0.3	Suppressor of forked protein (Suf)	HAT (Half-A-TPR) repeat, Suppressor of forked, Tetratricopeptide-like helical domain superfamily, Tetratricopeptide repeat-containing domain	GO:0006396|GO:0005634|GO:0006397|GO:0005515			Tetratricopeptide repeat-containing domain	HAT (Half-A-TPR) repeat, HAT (Half-A-TPR) repeat, HAT (Half-A-TPR) repeat, HAT (Half-A-TPR) repeat, HAT (Half-A-TPR) repeat, HAT (Half-A-TPR) repeat	Tetratricopeptide-like helical domain superfamily, Tetratricopeptide-like helical domain superfamily
g1096	1	3802489	3805508									988	0.61	Piwi domain, N-terminal domain of argonaute, Argonaute linker 2 domain, PAZ domain, Argonaute linker 1 domain	Piwi domain, PAZ domain, Protein argonaute, N-terminal, Argonaute linker 2 domain, PAZ domain superfamily, Ribonuclease H-like superfamily, Ribonuclease H superfamily, Argonaute, linker 1 domain	GO:0003676|GO:0005515	Reactome: R-HSA-1912408|Reactome: R-HSA-203927|Reactome: R-HSA-4086398|Reactome: R-HSA-426486|Reactome: R-HSA-426496|Reactome: R-HSA-5628897|Reactome: R-HSA-5687128|Reactome: R-HSA-8934593|Reactome: R-HSA-8943723|Reactome: R-HSA-8948700|Reactome: R-HSA-8986944|Reactome: R-HSA-9018519|Reactome: R-HSA-9022692|Reactome: R-HSA-9029569		PAZ domain, Piwi domain	Piwi domain, PAZ domain, Argonaute, linker 1 domain	PAZ domain superfamily, Ribonuclease H-like superfamily, PAZ domain superfamily
g1097	1	3806877	3807923	1		1	1			Non-effector	0.68	348	4.6
g1098	1	3808216	3810035			1	1					450	1.11	Saccharopine dehydrogenase NADP binding domain, Saccharopine dehydrogenase C-terminal domain	Saccharopine dehydrogenase, NADP binding domain, NAD(P)-binding domain superfamily, Saccharopine dehydrogenase, C-terminal	GO:0016491|GO:0055114	Reactome: R-HSA-71064				NAD(P)-binding domain superfamily
g1099	1	3813552	3814047									131	2.29
g1100	1	3815408	3817161		12		6	7	12			526	1.14	Major Facilitator Superfamily	Major facilitator superfamily domain, MFS transporter superfamily, Major facilitator superfamily	GO:0022857|GO:0022857|GO:0055085			Major facilitator superfamily domain		MFS transporter superfamily
g1101	1	3818887	3821973									984	1.12	Lethal giant larvae(Lgl) like, C-terminal, WD domain, G-beta repeat	WD40-repeat-containing domain superfamily, Lethal giant larvae (Lgl)-like, C-terminal domain, WD40-repeat-containing domain, WD40 repeat	GO:0005515			WD40-repeat-containing domain, WD40 repeat		WD40-repeat-containing domain superfamily, WD40-repeat-containing domain superfamily
g1102	1	3824229	3824938									219	3.2	Zinc finger, C2H2 type, Zinc finger, C2H2 type	Zinc finger C2H2-type, Zinc finger C2H2 superfamily				Zinc finger C2H2-type, Zinc finger C2H2-type	Zinc finger C2H2-type, Zinc finger C2H2-type, Zinc finger C2H2-type	Zinc finger C2H2 superfamily
g1103	1	3829683	3830102									102
g1104	1	3835813	3837035									125
g1105	1	3838276	3840617		1		1	1				682	2.93	Fungal Zn(2)-Cys(6) binuclear cluster domain, Fungal specific transcription factor domain	Zn(2)-C6 fungal-type DNA-binding domain superfamily, Zn(2)-C6 fungal-type DNA-binding domain, Transcription factor domain, fungi	GO:0000981|GO:0006355|GO:0008270|GO:0042025|GO:0003677|GO:0005634|GO:0006351|GO:0008270		Zn(2)-C6 fungal-type DNA-binding domain	Zn(2)-C6 fungal-type DNA-binding domain	Transcription factor domain, fungi, Zn(2)-C6 fungal-type DNA-binding domain	Zn(2)-C6 fungal-type DNA-binding domain superfamily
g1106	1	3844126	3846535			1	1					526	0.95	mRNA cleavage and polyadenylation factor CLP1 P-loop	Polyribonucleotide 5'-hydroxyl-kinase Clp1, P-loop domain
g1107	1	3847081	3849127									664	0.15	DNA-directed RNA polymerase I subunit RPA34.5	DNA-directed RNA polymerase I, subunit RPA34.5	GO:0006360	Reactome: R-HSA-427413|Reactome: R-HSA-5250924|Reactome: R-HSA-73762|Reactome: R-HSA-73772|Reactome: R-HSA-73863
g1108	1	3856549	3857963		8		4	5	8			454	1.76	PAP2 superfamily	Phosphatidic acid phosphatase type 2/haloperoxidase superfamily, Inositolphosphotransferase Aur1/Ipt1, Phosphatidic acid phosphatase type 2/haloperoxidase					Phosphatidic acid phosphatase type 2/haloperoxidase	Phosphatidic acid phosphatase type 2/haloperoxidase superfamily
g1109	1	3859752	3861057									410	1.46	Protein kinase domain	Serine/threonine-protein kinase, active site, Protein kinase domain, Protein kinase, ATP binding site, Protein kinase-like domain superfamily	GO:0004672|GO:0006468|GO:0004672|GO:0005524|GO:0006468|GO:0005524			Protein kinase domain	Protein kinase domain	Protein kinase-like domain superfamily
g1110	1	3862066	3862735									167		RF-1 domain	Peptide chain release factor class I	GO:0003747|GO:0006415
g1111	1	3863665	3866300									859		RNA recognition motif. (a.k.a. RRM, RBD, or RNP domain)	RNA recognition motif domain, RNA-binding domain superfamily, Nucleotide-binding alpha-beta plait domain superfamily	GO:0003676			RNA recognition motif domain	RNA recognition motif domain	RNA-binding domain superfamily
g1112	1	3867130	3868892		6		4	3	4			570	0.18	FAD-binding domain, Ferric reductase like transmembrane component, Ferric reductase NAD binding domain	FAD-binding 8, Ferredoxin-NADP reductase (FNR), nucleotide-binding domain, FAD-binding domain, ferredoxin reductase-type, Riboflavin synthase-like beta-barrel, Ferric reductase transmembrane component-like domain, Ferric reductase, NAD binding domain	GO:0016491|GO:0055114			FAD-binding domain, ferredoxin reductase-type		Riboflavin synthase-like beta-barrel, Ferredoxin-NADP reductase (FNR), nucleotide-binding domain
g1113	1	3869596	3870733		5	1	3	3	6			359	0.84	Eukaryotic integral membrane protein (DUF1751)	TMEM115/Pdh1/Rbl19	GO:0006890|GO:0016021	Reactome: R-HSA-6807878						TMEM115/Pdh1/Rbl19
g1114	1	3875464	3877820									639	1.25	WD domain, G-beta repeat, LisH	WD40 repeat, WD40 repeat, conserved site, WD40-repeat-containing domain, WD40-repeat-containing domain superfamily, LIS1 homology motif, WD40/YVTN repeat-like-containing domain superfamily	GO:0005515			WD40-repeat-containing domain, LIS1 homology motif	WD40 repeat, WD40 repeat, WD40 repeat, WD40 repeat, WD40 repeat, WD40 repeat, LIS1 homology motif	WD40-repeat-containing domain superfamily
g1115	1	3880896	3883280	1	1	1	1	1	1			773	5.95	Disintegrin, Metallo-peptidase family M12	Disintegrin domain, Peptidase M12B, ADAM/reprolysin, Metallopeptidase, catalytic domain superfamily, Fungal reprolysin domain, Disintegrin domain superfamily	GO:0004222|GO:0006508|GO:0008237		Fungal reprolysin domain	Peptidase M12B, ADAM/reprolysin, Disintegrin domain	Disintegrin domain	Disintegrin domain superfamily
g1116	1	3885360	3887892									719	0.97	AMP-binding enzyme C-terminal domain, Acetyl-coenzyme A synthetase N-terminus, AMP-binding enzyme	AMP-binding enzyme, C-terminal domain, Acetate-CoA ligase, Acetyl-coenzyme A synthetase, N-terminal domain, AMP-dependent synthetase/ligase, AMP-binding, conserved site, AMP-dependent synthetase-like superfamily	GO:0003987|GO:0016208|GO:0019427|GO:0003824	KEGG: 00010+6.2.1.1|KEGG: 00620+6.2.1.1|KEGG: 00630+6.2.1.1|KEGG: 00640+6.2.1.1|KEGG: 00680+6.2.1.1|KEGG: 00720+6.2.1.1|MetaCyc: PWY-5108|MetaCyc: PWY-5132|MetaCyc: PWY-5133|MetaCyc: PWY-6672|MetaCyc: PWY-7118|MetaCyc: PWY-7857|Reactome: R-HSA-71384, KEGG: 00010+6.2.1.1|KEGG: 00620+6.2.1.1|KEGG: 00630+6.2.1.1|KEGG: 00640+6.2.1.1|KEGG: 00680+6.2.1.1|KEGG: 00720+6.2.1.1|MetaCyc: PWY-5108|MetaCyc: P…					Acetate-CoA ligase
g1117	1	3891512	3892688									352	0.57	DNA polymerase III, delta subunit	DNA polymerase III, clamp loader complex, gamma/delta/delta subunit, C-terminal, P-loop containing nucleoside triphosphate hydrolase, AAA+ ATPase domain	GO:0003677|GO:0006260	Reactome: R-HSA-110312|Reactome: R-HSA-110314|Reactome: R-HSA-110320|Reactome: R-HSA-174411|Reactome: R-HSA-5651801|Reactome: R-HSA-5655862|Reactome: R-HSA-5656121|Reactome: R-HSA-5656169|Reactome: R-HSA-5685942|Reactome: R-HSA-5696397|Reactome: R-HSA-5696400|Reactome: R-HSA-6782135|Reactome: R-HSA-6782210|Reactome: R-HSA-69091			AAA+ ATPase domain	DNA polymerase III, clamp loader complex, gamma/delta/delta subunit, C-terminal, P-loop containing nucleoside triphosphate hydrolase
g1118	1	3893070	3893930									252	0.79	Ribosomal protein L16p/L10e	Ribosomal protein L16, Ribosomal protein L10e/L16 superfamily, Ribosomal protein L10e/L16, Ribosomal protein L16, conserved site	GO:0003735|GO:0006412|GO:0019843|GO:0003735|GO:0005840|GO:0006412	Reactome: R-HSA-5368286|Reactome: R-HSA-5389840|Reactome: R-HSA-5419276	Ribosomal protein L10e/L16			Ribosomal protein L10e/L16 superfamily	Ribosomal protein L16	Ribosomal protein L16
g1119	1	3894264	3897617									1048	0.57	BRCA1 C Terminus (BRCT) domain, Replication factor RFC1 C terminal domain, ATPase family associated with various cellular activities (AAA)	BRCT domain, AAA+ ATPase domain, Replication factor C subunit 1, DNA polymerase III, clamp loader complex, gamma/delta/delta subunit, C-terminal, DNA replication factor RFC1, C-terminal, P-loop containing nucleoside triphosphate hydrolase, BRCT domain superfamily, ATPase, AAA-type, core	GO:0003689|GO:0005524|GO:0005663|GO:0006260|GO:0006281|GO:0003677|GO:0006260|GO:0003689|GO:0005524|GO:0005663|GO:0006260|GO:0005524	Reactome: R-HSA-110312|Reactome: R-HSA-110314|Reactome: R-HSA-110320|Reactome: R-HSA-174411|Reactome: R-HSA-5651801|Reactome: R-HSA-5655862|Reactome: R-HSA-5656121|Reactome: R-HSA-5656169|Reactome: R-HSA-5685942|Reactome: R-HSA-5696397|Reactome: R-HSA-5696400|Reactome: R-HSA-6782135|Reactome: R-HSA-6782210|Reactome: R-HSA-69091		BRCT domain	AAA+ ATPase domain, BRCT domain	DNA polymerase III, clamp loader complex, gamma/delta/delta subunit, C-terminal, P-loop containing nucleoside triphosphate hydrolase, BRCT domain superfamily
g1120	1	3898370	3901992									858	1.05
g1121	1	3903035	3903457									104		DASH complex subunit Dad1	DASH complex subunit Dad1	GO:0007052|GO:0042729|GO:0072686							DASH complex subunit Dad1
g1122	1	3903873	3910676									2232	0.18		SANT domain, SANT/Myb domain, Homeobox-like domain superfamily	GO:0003677		SANT/Myb domain	SANT domain, SANT domain	SANT/Myb domain, SANT/Myb domain	Homeobox-like domain superfamily, Homeobox-like domain superfamily
g1123	1	3911693	3912892									357	1.96	Deoxyhypusine synthase	DHS-like NAD/FAD-binding domain superfamily, Deoxyhypusine synthase, Deoxyhypusine synthase superfamily	GO:0008612	Reactome: R-HSA-204626				DHS-like NAD/FAD-binding domain superfamily	Deoxyhypusine synthase	Deoxyhypusine synthase
g1124	1	3913166	3914063									278	1.08
g1125	1	3914439	3915393									300	0.33	Aldo/keto reductase family	NADP-dependent oxidoreductase domain, NADP-dependent oxidoreductase domain superfamily, Aldo/keto reductase	GO:0016491|GO:0055114		NADP-dependent oxidoreductase domain			NADP-dependent oxidoreductase domain superfamily		Aldo/keto reductase
g1126	1	3916332	3917609									391	1.53	Oxidoreductase family, NAD-binding Rossmann fold	Oxidoreductase, N-terminal, NAD(P)-binding domain superfamily	GO:0016491					NAD(P)-binding domain superfamily
g1127	1	3919158	3920000									280	1.07	Methyltransferase domain	Methyltransferase type 11, S-adenosyl-L-methionine-dependent methyltransferase	GO:0008168					S-adenosyl-L-methionine-dependent methyltransferase
g1128	1	3920827	3923796									436	0.69	Myb-like DNA-binding domain	SANT/Myb domain, Myb domain, Homeobox-like domain superfamily, Myb-like domain	GO:0003677		SANT/Myb domain	Myb domain, Myb-like domain	SANT/Myb domain	Homeobox-like domain superfamily
g1129	1	3931966	3933036									242	0.83	CAP-Gly domain, Ubiquitin-like domain	CAP Gly-rich domain, Ubiquitin-like domain superfamily, CAP Gly-rich domain superfamily, Ubiquitin-like domain	GO:0005515			CAP Gly-rich domain	CAP Gly-rich domain	Ubiquitin-like domain superfamily, CAP Gly-rich domain superfamily
g1130	1	3936314	3937976	1	1	1	1	1	2			517	1.74	Ring finger domain	Zinc finger, RING-type, Zinc finger, RING/FYVE/PHD-type				Zinc finger, RING-type	Zinc finger, RING-type
g1131	1	3941670	3943375		6		4	3	6			419	2.39
g1132	1	3944286	3945452	1		1	1			Non-effector	0.876	388	2.06	Glycosyl hydrolase catalytic core	Uncharacterised protein family, glycosyl hydrolase catalytic domain, Glycoside hydrolase superfamily						Glycoside hydrolase superfamily
g1133	1	3949574	3951126									450	2.22	Fungal specific transcription factor domain, Fungal Zn(2)-Cys(6) binuclear cluster domain	Zn(2)-C6 fungal-type DNA-binding domain superfamily, Zn(2)-C6 fungal-type DNA-binding domain, Fungal transcription factor	GO:0000981|GO:0006355|GO:0008270|GO:0042025		Zn(2)-C6 fungal-type DNA-binding domain	Zn(2)-C6 fungal-type DNA-binding domain	Zn(2)-C6 fungal-type DNA-binding domain	Zn(2)-C6 fungal-type DNA-binding domain superfamily
g1134	1	3952399	3953328									292	1.37
g1135	1	3953496	3955594		12		6	7	7			652	1.69	Bacterial low temperature requirement A protein (LtrA)	Low temperature requirement A								Low temperature requirement A
g1136	1	3956240	3956623									72		Mitochondrial ATP synthase epsilon chain	ATP synthase, F1 complex, epsilon subunit superfamily, mitochondrial, ATP synthase, F1 complex, epsilon subunit, mitochondrial	GO:0000275|GO:0015986|GO:0046933		ATP synthase, F1 complex, epsilon subunit, mitochondrial			ATP synthase, F1 complex, epsilon subunit superfamily, mitochondrial		ATP synthase, F1 complex, epsilon subunit, mitochondrial
g1137	1	3957252	3959864									757	1.72	Mak10 subunit, NatC N(alpha)-terminal acetyltransferase	-alpha-acetyltransferase 35, NatC auxiliary subunit	GO:0017196|GO:0031417	Reactome: R-HSA-6811440						-alpha-acetyltransferase 35, NatC auxiliary subunit
g1138	1	3960207	3961355		4		3	2	5			346		Mitochondrial carrier protein, Mitochondrial carrier protein, Mitochondrial carrier protein	Mitochondrial substrate/solute carrier, Mitochondrial carrier domain superfamily				Mitochondrial substrate/solute carrier, Mitochondrial substrate/solute carrier, Mitochondrial substrate/solute carrier		Mitochondrial carrier domain superfamily
g1139	1	3962196	3966800									1534	0.07
g1140	1	3967206	3968593									423	0.71	26S proteasome subunit RPN6 C-terminal helix domain, PCI domain, 26S proteasome regulatory subunit RPN6 N-terminal domain	Proteasome component (PCI) domain, 6S proteasome subunit Rpn6, C-terminal helix domain, Winged helix DNA-binding domain superfamily, 26S proteasome regulatory subunit Rpn6, N-terminal		Reactome: R-HSA-1169091|Reactome: R-HSA-1234176|Reactome: R-HSA-1236974|Reactome: R-HSA-1236978|Reactome: R-HSA-174084|Reactome: R-HSA-174113|Reactome: R-HSA-174154|Reactome: R-HSA-174178|Reactome: R-HSA-174184|Reactome: R-HSA-180534|Reactome: R-HSA-180585|Reactome: R-HSA-187577|Reactome: R-HSA-195253|Reactome: R-HSA-202424|Reactome: R-HSA-211733|Reactome: R-HSA-2467813|Reactome: R-HSA-2871837|Re…		Proteasome component (PCI) domain	Proteasome component (PCI) domain	Winged helix DNA-binding domain superfamily
g1141	1	3969192	3969978									244	0.41	GrpE	GrpE nucleotide exchange factor, GrpE nucleotide exchange factor, head, GrpE nucleotide exchange factor, coiled-coil	GO:0000774|GO:0006457|GO:0042803|GO:0051087|GO:0006457	Reactome: R-HSA-1268020	GrpE nucleotide exchange factor			GrpE nucleotide exchange factor, head, GrpE nucleotide exchange factor, coiled-coil		GrpE nucleotide exchange factor
g1142	1	3971189	3972100									269	2.97	Ras family	Small GTPase Rho, Small GTP-binding protein domain, Small GTPase, P-loop containing nucleoside triphosphate hydrolase	GO:0005525|GO:0007264|GO:0005525|GO:0003924|GO:0005525	Reactome: R-HSA-194840		Small GTPase Rho		P-loop containing nucleoside triphosphate hydrolase	Small GTP-binding protein domain
g1143	1	3972893	3973511									110	1.82	Skp1 family, tetramerisation domain	S-phase kinase-associated protein 1-like, Elongin-C, SKP1 component, POZ domain, SKP1/BTB/POZ domain superfamily	GO:0006511	Reactome: R-HSA-8951664|Reactome: R-HSA-983168, Reactome: R-HSA-112382|Reactome: R-HSA-1234176|Reactome: R-HSA-167152|Reactome: R-HSA-167200|Reactome: R-HSA-167238|Reactome: R-HSA-167243|Reactome: R-HSA-167246|Reactome: R-HSA-167287|Reactome: R-HSA-167290|Reactome: R-HSA-180585|Reactome: R-HSA-674695|Reactome: R-HSA-6796648|Reactome: R-HSA-75955|Reactome: R-HSA-8951664|Reactome: R-HSA-9010553|Rea…			S-phase kinase-associated protein 1-like	SKP1/BTB/POZ domain superfamily		Elongin-C
g1144	1	3974452	3977885									718	1.25	Lariat debranching enzyme, C-terminal domain, Mob1/phocein family, Calcineurin-like phosphoesterase	Lariat debranching enzyme, N-terminal metallophosphatase domain, MOB kinase activator family, Lariat debranching enzyme, C-terminal, MOB kinase activator superfamily, Calcineurin-like phosphoesterase domain, ApaH type	GO:0006397|GO:0016788|GO:0016787		Lariat debranching enzyme, N-terminal metallophosphatase domain		MOB kinase activator family, Lariat debranching enzyme, C-terminal	MOB kinase activator superfamily
g1145	1	3978369	3979413									226		ATP synthase delta (OSCP) subunit	ATPase, OSCP/delta subunit, F1F0 ATP synthase OSCP/delta subunit, N-terminal domain superfamily, ATPase, OSCP/delta subunit, conserved site	GO:0015986|GO:0046933|GO:0015986|GO:0016020|GO:0046933	Reactome: R-HSA-163210|Reactome: R-HSA-8949613				F1F0 ATP synthase OSCP/delta subunit, N-terminal domain superfamily	ATPase, OSCP/delta subunit	ATPase, OSCP/delta subunit
g1146	1	3980074	3983573									1018	1.38	Glycosyl hydrolase family 63 C-terminal domain	Six-hairpin glycosidase superfamily, Glycoside hydrolase family 63, Glycosyl hydrolase family 63, C-terminal	GO:0003824|GO:0004573|GO:0009311	Reactome: R-HSA-4793954|Reactome: R-HSA-532668, KEGG: 00510+3.2.1.106|MetaCyc: PWY-7918|MetaCyc: PWY-7919|Reactome: R-HSA-4793954|Reactome: R-HSA-532668				Six-hairpin glycosidase superfamily		Glycoside hydrolase family 63
g1147	1	3986268	3987462									363	0.83	Putative undecaprenyl diphosphate synthase	Decaprenyl diphosphate synthase-like superfamily, Decaprenyl diphosphate synthase-like, Di-trans-poly-cis-decaprenylcistransferase-like, conserved site	GO:0016765	Reactome: R-HSA-446199|Reactome: R-HSA-4755609	Decaprenyl diphosphate synthase-like			Decaprenyl diphosphate synthase-like superfamily	Decaprenyl diphosphate synthase-like	Decaprenyl diphosphate synthase-like
g1148	1	3988383	3990661									719	0.97	Inhibitor of growth proteins N-terminal histone-binding	Zinc finger, RING/FYVE/PHD-type, Zinc finger, PHD-type, conserved site, Inhibitor of growth protein, N-terminal histone-binding, ING family, Zinc finger, FYVE/PHD-type, Zinc finger, PHD-finger, Zinc finger, PHD-type				Zinc finger, PHD-finger	Inhibitor of growth protein, N-terminal histone-binding, Zinc finger, PHD-type	Zinc finger, FYVE/PHD-type		ING family
g1149	1	3994856	3996743									590	1.02		Leucine-rich repeat domain superfamily
g1150	1	3997457	4000247		7		4	4	7			857	0.82	V-type ATPase 116kDa subunit family	V-type ATPase, V0 complex, 116kDa subunit family, ATPase, V0 complex, subunit 116kDa, eukaryotic	GO:0015078|GO:0033179|GO:1902600|GO:0000220	Reactome: R-HSA-1222556|Reactome: R-HSA-77387|Reactome: R-HSA-917977|Reactome: R-HSA-983712						V-type ATPase, V0 complex, 116kDa subunit family
g1151	1	4000483	4003431									832	0.96	Zn-dependent metallo-hydrolase RNA specificity domain, Beta-Casp domain, Pre-mRNA 3'-end-processing endonuclease polyadenylation factor C-term, Metallo-beta-lactamase superfamily	Zn-dependent metallo-hydrolase, RNA specificity domain, Beta-Casp domain, Metallo-beta-lactamase, Ribonuclease Z/Hydroxyacylglutathione hydrolase-like, Pre-mRNA 3'-end-processing endonuclease polyadenylation factor C-term		Reactome: R-HSA-159231|Reactome: R-HSA-72163|Reactome: R-HSA-72187|Reactome: R-HSA-73856|Reactome: R-HSA-77595			Metallo-beta-lactamase, Beta-Casp domain, Pre-mRNA 3'-end-processing endonuclease polyadenylation factor C-term	Ribonuclease Z/Hydroxyacylglutathione hydrolase-like
g1152	1	4004127	4006094									639		Transcription initiation factor TFIID component TAF4 family	Transcription initiation factor TFIID component TAF4	GO:0005669|GO:0006352	Reactome: R-HSA-167161|Reactome: R-HSA-167162|Reactome: R-HSA-167172|Reactome: R-HSA-674695|Reactome: R-HSA-6804756|Reactome: R-HSA-73776|Reactome: R-HSA-73779|Reactome: R-HSA-75953|Reactome: R-HSA-76042
g1153	1	4007091	4008422									295	1.02	Carbon-nitrogen hydrolase	Carbon-nitrogen hydrolase, Carbon-nitrogen hydrolase superfamily	GO:0006807			Carbon-nitrogen hydrolase		Carbon-nitrogen hydrolase superfamily
g1154	1	4014395	4015783									141	2.13
g1155	1	4021932	4022670									201	1	ARP2/3 complex 16 kDa subunit (p16-Arc)	Actin-related protein 2/3 complex subunit 5 superfamily, Actin-related protein 2/3 complex subunit 5	GO:0005885|GO:0015629|GO:0030833|GO:0034314					Actin-related protein 2/3 complex subunit 5 superfamily		Actin-related protein 2/3 complex subunit 5
g1156	1	4022812	4023937									358	0.84	Methyltransferase domain	Methyltransferase type 11, S-adenosyl-L-methionine-dependent methyltransferase	GO:0008168					S-adenosyl-L-methionine-dependent methyltransferase
g1157	1	4024760	4027875									985	1.22	Adaptin C-terminal domain, Alpha adaptin AP2, C-terminal domain, Adaptin N terminal region	Armadillo-like helical, Clathrin adaptor, alpha/beta/gamma-adaptin, appendage, Ig-like subdomain, Clathrin adaptor, appendage, Ig-like subdomain superfamily, TBP domain superfamily, Clathrin adaptor, alpha-adaptin, appendage, C-terminal subdomain, Armadillo-type fold, Adaptor protein complex AP-2, alpha subunit, Coatomer/calthrin adaptor appendage, C-terminal subdomain, Clathrin/coatomer adaptor,…	GO:0006886|GO:0016192|GO:0006886|GO:0016192|GO:0030131|GO:0015031|GO:0030122|GO:0035615|GO:0072583|GO:0006886|GO:0016192|GO:0030117	Reactome: R-HSA-167590|Reactome: R-HSA-177504|Reactome: R-HSA-182218|Reactome: R-HSA-2132295|Reactome: R-HSA-3928665|Reactome: R-HSA-416993|Reactome: R-HSA-437239|Reactome: R-HSA-5099900|Reactome: R-HSA-5140745|Reactome: R-HSA-8856825|Reactome: R-HSA-8856828|Reactome: R-HSA-8866427|Reactome: R-HSA-8964038			Clathrin adaptor, alpha/beta/gamma-adaptin, appendage, Ig-like subdomain	Clathrin adaptor, appendage, Ig-like subdomain superfamily, Armadillo-type fold, Coatomer/calthrin adaptor appendage, C-terminal subdomain
g1158	1	4028267	4029184									263	1.9	Alanine racemase, N-terminal domain	Alanine racemase, N-terminal, Pyridoxal phosphate homeostasis protein, PLP-binding barrel	GO:0030170	KEGG: 00473+5.1.1.1|MetaCyc: PWY-7383|MetaCyc: PWY-8040|MetaCyc: PWY-8072				PLP-binding barrel	Pyridoxal phosphate homeostasis protein	Pyridoxal phosphate homeostasis protein
g1159	1	4029429	4030553									374
g1160	1	4031216	4032902									542		Sds3-like	Sds3-like					Sds3-like			Sds3-like
g1161	1	4033282	4034130									282	0.35
g1162	1	4035169	4037194									656	0.61	ARS binding protein 2	ARS binding protein 2								ARS binding protein 2
g1163	1	4039809	4041949		12		6	7	10			653	1.84	Sugar (and other) transporter	Sugar transporter, conserved site, Sugar/inositol transporter, Major facilitator superfamily domain, Major facilitator, sugar transporter-like, MFS transporter superfamily	GO:0016021|GO:0022857|GO:0055085|GO:0016020|GO:0022857|GO:0055085|GO:0022857	Reactome: R-HSA-189200		Major facilitator superfamily domain		MFS transporter superfamily	Sugar/inositol transporter
g1164	1	4045999	4048755		6		3	4	6			901	0.44	Mechanosensitive ion channel	EF-Hand 1, calcium-binding site, EF-hand domain, LSM domain superfamily, Mechanosensitive ion channel MscS	GO:0005509|GO:0016020|GO:0055085			EF-hand domain		LSM domain superfamily
g1165	1	4049098	4050223									283	1.77	Dienelactone hydrolase family	Alpha/Beta hydrolase fold, Dienelactone hydrolase	GO:0016787					Alpha/Beta hydrolase fold
g1166	1	4051103	4053884		2		2	1	2			860	0.35	Root hair defective 3 GTP-binding protein (RHD3)	P-loop containing nucleoside triphosphate hydrolase, RHD3/Sey1, GB1/RHD3-type guanine nucleotide-binding (G) domain	GO:0005525			GB1/RHD3-type guanine nucleotide-binding (G) domain		P-loop containing nucleoside triphosphate hydrolase
g1167	1	4054062	4055081									339	2.36	Ribonuclease HII	Ribonuclease H superfamily, Ribonuclease H2, subunit A, Ribonuclease HII/HIII, Ribonuclease HII, helix-loop-helix cap domain superfamily, Ribonuclease H-like superfamily, Ribonuclease HII/HIII domain	GO:0003676|GO:0004523|GO:0016070|GO:0003723|GO:0004523|GO:0004523					Ribonuclease H-like superfamily	Ribonuclease H2, subunit A	Ribonuclease HII/HIII
g1168	1	4055978	4058127									653	0.15	Kinetochore CENP-C fungal homologue, Mif2, N-terminal, Mif2/CENP-C like	Linker histone H1/H5, RmlC-like cupin domain superfamily, Mif2/cnp3, N-terminal, Mif2/CENP-C cupin domain, RmlC-like jelly roll fold, Centromere protein C/Mif2/cnp3	GO:0000786|GO:0003677|GO:0006334|GO:0000776|GO:0019237|GO:0051382	Reactome: R-HSA-141444|Reactome: R-HSA-2467813|Reactome: R-HSA-2500257|Reactome: R-HSA-5663220|Reactome: R-HSA-606279|Reactome: R-HSA-68877|Reactome: R-HSA-9648025				RmlC-like cupin domain superfamily		Centromere protein C/Mif2/cnp3
g1169	1	4058602	4061331		1	1	1	1				871	0.46	RNA12 protein, RNA recognition motif. (a.k.a. RRM, RBD, or RNP domain)	P-loop containing nucleoside triphosphate hydrolase, Mitochondrial escape protein 2, Nucleotide-binding alpha-beta plait domain superfamily, RNA recognition motif domain, Mitochondrial escape protein 2, C-terminal, RNA-binding domain superfamily, Yme2, RNA recognition motif	GO:0000002|GO:0031305|GO:0003676		Yme2, RNA recognition motif	RNA recognition motif domain		P-loop containing nucleoside triphosphate hydrolase, RNA-binding domain superfamily		Mitochondrial escape protein 2
g1170	1	4062410	4063072									220	1.82	Protein of unknown function (DUF3128)	Protein of unknown function DUF3128								Protein of unknown function DUF3128
g1171	1	4063709	4065929									652	0.61	Hsp70 protein	Heat shock protein 70kD, C-terminal domain superfamily, Heat shock protein 70 family, Heat shock protein 70, conserved site, Heat shock protein 70kD, peptide-binding domain superfamily, ATPase, nucleotide binding domain		Reactome: R-HSA-3371453				Heat shock protein 70kD, C-terminal domain superfamily, Heat shock protein 70kD, peptide-binding domain superfamily, ATPase, nucleotide binding domain, ATPase, nucleotide binding domain		Heat shock protein 70 family
g1172	1	4070130	4072360		14		7	8	14			642	2.02	Major Facilitator Superfamily	Major facilitator superfamily domain, MFS transporter superfamily, Tetracycline resistance protein/drug resistance transporter, Major facilitator superfamily	GO:0022857|GO:0022857|GO:0055085			Major facilitator superfamily domain		MFS transporter superfamily, MFS transporter superfamily		Tetracycline resistance protein/drug resistance transporter
g1173	1	4075572	4078261									859	1.86	Choline/Carnitine o-acyltransferase	Choline/Carnitine o-acyltransferase, domain 1, Acyltransferase ChoActase/COT/CPT, Choline/carnitine acyltransferase domain, Choline/Carnitine o-acyltransferase, domain 2, Chloramphenicol acetyltransferase-like domain superfamily, Carnitine o-acyltransferase, N-terminal	GO:0016746	Reactome: R-HSA-389661						Acyltransferase ChoActase/COT/CPT
g1174	1	4079365	4083783									1061	1.13	Pumilio-family RNA binding repeat, Pumilio-family RNA binding repeat, Pumilio-family RNA binding repeat, Pumilio-family RNA binding repeat, Pumilio-family RNA binding repeat, Pumilio-family RNA binding repeat, Pumilio-family RNA binding repeat	Pumilio RNA-binding repeat, Pumilio, RNA binding domain, Armadillo-like helical, Armadillo-type fold, Pumilio homology domain	GO:0003723		Pumilio, RNA binding domain	Pumilio RNA-binding repeat, Pumilio RNA-binding repeat, Pumilio RNA-binding repeat, Pumilio homology domain, Pumilio RNA-binding repeat, Pumilio RNA-binding repeat, Pumilio RNA-binding repeat, Pumilio RNA-binding repeat, Pumilio RNA-binding repeat	Pumilio RNA-binding repeat, Pumilio RNA-binding repeat, Pumilio RNA-binding repeat, Pumilio RNA-binding repeat, Pumilio RNA-binding repeat, Pumilio RNA-binding repeat, Pumilio RNA-binding repeat, Pumilio RNA-binding repeat	Armadillo-type fold
g1175	1	4089508	4093145									1157	1.21	RNA polymerase Rpb2, domain 4, RNA polymerase beta subunit, RNA polymerase Rpb2, domain 6, RNA polymerase Rpb2, domain 2, RNA polymerase Rpb2, domain 7, RNA polymerase Rpb2, domain 3, RNA polymerase Rpb2, domain 5	DNA-directed RNA polymerase, subunit 2, RNA polymerase Rpb2, domain 4, RNA polymerase, beta subunit, protrusion, DNA-directed RNA polymerase, subunit 2, hybrid-binding domain, RNA polymerase, beta subunit, conserved site, RNA polymerase Rpb2, domain 2, RNA polymerase Rpb2, domain 7, DNA-directed RNA polymerase, subunit 2, hybrid-binding domain superfamily, RNA polymerase Rpb2, OB-fold, RNA polyme…	GO:0003899|GO:0006351|GO:0032549|GO:0003677|GO:0003899|GO:0006351|GO:0003899|GO:0006351		DNA-directed RNA polymerase, subunit 2					DNA-directed RNA polymerase, subunit 2
g1176	1	4093377	4094696									439	0.46	Rad51	DNA recombination and repair protein Rad51-like, C-terminal, DNA recombination and repair protein RecA-like, ATP-binding domain, P-loop containing nucleoside triphosphate hydrolase	GO:0003677|GO:0005524|GO:0006281|GO:0008094	Reactome: R-HSA-5685942|Reactome: R-HSA-5693554|Reactome: R-HSA-5693568|Reactome: R-HSA-5693579		DNA recombination and repair protein RecA-like, ATP-binding domain		P-loop containing nucleoside triphosphate hydrolase
g1177	1	4095511	4096731									252	0.79	Ribosomal L15	Ribosomal protein L23/L15e core domain superfamily, Ribosomal protein L15e core domain superfamily, Ribosomal protein L15e, Ribosomal protein L15e, conserved site	GO:0003735|GO:0005840|GO:0006412|GO:0003735|GO:0005840	Reactome: R-HSA-156827|Reactome: R-HSA-156902|Reactome: R-HSA-1799339|Reactome: R-HSA-192823|Reactome: R-HSA-2408557|Reactome: R-HSA-6791226|Reactome: R-HSA-72689|Reactome: R-HSA-72706|Reactome: R-HSA-72764|Reactome: R-HSA-9010553|Reactome: R-HSA-9633012|Reactome: R-HSA-975956|Reactome: R-HSA-975957			Ribosomal protein L15e	Ribosomal protein L23/L15e core domain superfamily		Ribosomal protein L15e
g1178	1	4101654	4102314									203
g1179	1	4103478	4106271									894	0.22	PSP1 C-terminal conserved region	PSP1, C-terminal				PSP1, C-terminal
g1180	1	4114908	4118196									1077	1.11	WD domain, G-beta repeat, WD domain, G-beta repeat	WD40 repeat, WD40-repeat-containing domain superfamily, WD40 repeat, conserved site, WD40-repeat-containing domain, WD40/YVTN repeat-like-containing domain superfamily	GO:0005515			WD40 repeat, WD40-repeat-containing domain, WD40 repeat	WD40 repeat, WD40 repeat, WD40 repeat, WD40 repeat, WD40 repeat, WD40 repeat, WD40 repeat, WD40 repeat, WD40 repeat	WD40-repeat-containing domain superfamily, WD40-repeat-containing domain superfamily, WD40-repeat-containing domain superfamily
g1181	1	4118788	4119807		3	1	2	2	4			339	2.65	SUR7/PalI family	Membrane protein SUR7/Rim9-like, fungi	GO:0005886
g1182	1	4122753	4124937									565	1.95	Hsp70 protein	ATPase, nucleotide binding domain, Heat shock protein 70 family		Reactome: R-HSA-3371453				ATPase, nucleotide binding domain, ATPase, nucleotide binding domain
g1183	1	4125689	4127057									437	1.37
g1184	1	4128377	4129647									123	0.81
g1185	1	4129725	4131423									532	2.44	Serine-threonine protein phosphatase N-terminal domain, Calcineurin-like phosphoesterase	Phosphoprotein phosphatase PPZ/Ppq1, Serine-threonine protein phosphatase, N-terminal, Serine/threonine-specific protein phosphatase/bis(5-nucleosyl)-tetraphosphatase, Calcineurin-like phosphoesterase domain, ApaH type, Metallo-dependent phosphatase-like	GO:0004724|GO:0016787	KEGG: 04658+3.1.3.16|KEGG: 04660+3.1.3.16|KEGG: 05235+3.1.3.16, KEGG: 04658+3.1.3.16|KEGG: 04660+3.1.3.16|KEGG: 05235+3.1.3.16|Reactome: R-HSA-163560|Reactome: R-HSA-2173788|Reactome: R-HSA-400253			Serine/threonine-specific protein phosphatase/bis(5-nucleosyl)-tetraphosphatase
g1186	1	4132081	4133127									348	0.29
g1187	1	4133208	4134074									271	0.37	Ribosome recycling factor	Ribosome recycling factor domain, RRF superfamily, Ribosome recycling factor	GO:0006412	Reactome: R-HSA-5419276				RRF superfamily		Ribosome recycling factor
g1188	1	4137177	4138902									527	1.14	Aldehyde dehydrogenase family	Aldehyde dehydrogenase domain, Aldehyde/histidinol dehydrogenase, Aldehyde dehydrogenase, N-terminal, Succinate semialdehyde dehydrogenase, Aldehyde dehydrogenase, cysteine active site, Aldehyde dehydrogenase, C-terminal, Aldehyde dehydrogenase, glutamic acid active site	GO:0016491|GO:0055114|GO:0009013|GO:0009450|GO:0055114|GO:0016491|GO:0016620|GO:0055114	Reactome: R-HSA-916853				Aldehyde/histidinol dehydrogenase	Succinate semialdehyde dehydrogenase
g1189	1	4139497	4140460		4		2	3	4			287	1.39
g1190	1	4144867	4149446									1508	0.93	Histidine kinase-, DNA gyrase B-, and HSP90-like ATPase, His Kinase A (phospho-acceptor) domain, Response regulator receiver domain	Histidine kinase/HSP90-like ATPase, PAS domain superfamily, Signal transduction histidine kinase-related protein, C-terminal, Signal transduction histidine kinase, dimerisation/phosphoacceptor domain, PAS-associated, C-terminal, Signal transduction histidine kinase, dimerisation/phosphoacceptor domain superfamily, Signal transduction response regulator, receiver domain, PAS domain, Histidine kina…	GO:0016310|GO:0016772|GO:0000155|GO:0007165|GO:0000160	Reactome: R-HSA-70895, Reactome: R-HSA-1296072, Reactome: R-HSA-204174|Reactome: R-HSA-5362517	Signal transduction histidine kinase, dimerisation/phosphoacceptor domain, Signal transduction response regulator, receiver domain, PAS domain	PAS-associated, C-terminal, Signal transduction response regulator, receiver domain, Histidine kinase domain	Signal transduction histidine kinase, dimerisation/phosphoacceptor domain, Histidine kinase/HSP90-like ATPase, Signal transduction response regulator, receiver domain	PAS domain superfamily, Signal transduction histidine kinase, dimerisation/phosphoacceptor domain superfamily, CheY-like superfamily, Histidine kinase/HSP90-like ATPase superfamily	PAS domain
g1191	1	4150720	4152650									570		Pleckstrin homology domain	Meiotic expression up-regulated protein 6, PH domain, PH-like domain superfamily, Pleckstrin homology domain, Meiotic expression up-regulated protein 6				Pleckstrin homology domain				Meiotic expression up-regulated protein 6
g1192	1	4161462	4163927									805	2.36
g1193	1	4164460	4164829									99	3.03	Ribosomal protein L36	Ribosomal protein L36 superfamily, Ribosomal protein L36	GO:0003735|GO:0005840|GO:0006412	Reactome: R-HSA-5368286|Reactome: R-HSA-5389840|Reactome: R-HSA-5419276				Ribosomal protein L36 superfamily	Ribosomal protein L36
g1194	1	4165066	4165539									102		Complex 1 protein (LYR family)	Complex 1 LYR protein
g1195	1	4166031	4166699									181	2.21	Acetyltransferase (GNAT) family	N-alpha-acetyltransferase 40, GNAT domain, Acyl-CoA N-acyltransferase	GO:0010485|GO:0043998|GO:0008080			GNAT domain		Acyl-CoA N-acyltransferase		N-alpha-acetyltransferase 40
g1196	1	4167860	4168564		1		1	1				197	7.61	PLAC8 family	PLAC8 motif-containing protein							PLAC8 motif-containing protein	PLAC8 motif-containing protein
g1197	1	4169561	4171405									532	0.75	CBS domain, CBS domain, IMP dehydrogenase / GMP reductase domain	CBS domain, Inosine-5'-monophosphate dehydrogenase, Aldolase-type TIM barrel, IMP dehydrogenase / GMP reductase, conserved site, IMP dehydrogenase/GMP reductase	GO:0003938|GO:0006164|GO:0055114|GO:0003824|GO:0016491|GO:0055114|GO:0003824|GO:0055114	KEGG: 00230+1.1.1.205|KEGG: 00983+1.1.1.205|MetaCyc: PWY-5695|MetaCyc: PWY-6596|MetaCyc: PWY-7221|Reactome: R-HSA-6798695|Reactome: R-HSA-73817	IMP dehydrogenase/GMP reductase	CBS domain, CBS domain	CBS domain, CBS domain		Inosine-5'-monophosphate dehydrogenase
g1198	1	4171926	4174873									878	0.68	Raffinose synthase or seed imbibition protein Sip1, Raffinose synthase or seed imbibition protein Sip1	Glycosyl hydrolases 36, Glycoside hydrolase superfamily, Aldolase-type TIM barrel	GO:0003824					Glycoside hydrolase superfamily		Glycosyl hydrolases 36
g1199	1	4175320	4176969			1	1					474	0.42	Insulinase (Peptidase family M16), Peptidase M16 inactive domain	Metalloenzyme, LuxS/M16 peptidase-like, Peptidase M16, zinc-binding site, Peptidase M16, N-terminal, Peptidase M16, C-terminal	GO:0003824|GO:0046872|GO:0004222|GO:0006508					Metalloenzyme, LuxS/M16 peptidase-like, Metalloenzyme, LuxS/M16 peptidase-like
g1200	1	4177239	4178000									253		Transcription initiation factor IID, 31kD subunit	Transcription initiation factor TAFII31, Histone-fold	GO:0006352|GO:0046982	Reactome: R-HSA-167161|Reactome: R-HSA-167162|Reactome: R-HSA-167172|Reactome: R-HSA-674695|Reactome: R-HSA-6804756|Reactome: R-HSA-73776|Reactome: R-HSA-73779|Reactome: R-HSA-75953|Reactome: R-HSA-76042	Transcription initiation factor TAFII31			Histone-fold
g1201	1	4178785	4181399									853	0.82	Phosphoribosyl-AMP cyclohydrolase, Histidinol dehydrogenase, Phosphoribosyl-ATP pyrophosphohydrolase	Phosphoribosyl-AMP cyclohydrolase domain, Histidinol dehydrogenase, Phosphoribosyl-ATP pyrophosphohydrolase-like, Phosphoribosyl-ATP pyrophosphohydrolase, Aldehyde/histidinol dehydrogenase, Histidine biosynthesis trifunctional-protein, Phosphoribosyl-AMP cyclohydrolase domain superfamily, Histidinol dehydrogenase, conserved site	GO:0000105|GO:0004635|GO:0000105|GO:0004399|GO:0046872|GO:0051287|GO:0055114|GO:0000105|GO:0004636|GO:0016491|GO:0055114|GO:0000105|GO:0004399|GO:0004635|GO:0004636|GO:0055114|GO:0000105|GO:0004399|GO:0055114	KEGG: 00340+3.5.4.19, KEGG: 00340+1.1.1.23, KEGG: 00340+3.6.1.31, KEGG: 00340+3.6.1.31+1.1.1.23+3.5.4.19	Histidinol dehydrogenase			Aldehyde/histidinol dehydrogenase, Phosphoribosyl-AMP cyclohydrolase domain superfamily	Histidinol dehydrogenase, Phosphoribosyl-ATP pyrophosphohydrolase	Histidinol dehydrogenase
g1202	1	4181795	4184278									790	0.25	lipin, N-terminal conserved region, LNS2 (Lipin/Ned1/Smp2)	LNS2/PITP, Lipin, N-terminal, HAD-like superfamily, LIPIN family, Lipin/Ned1/Smp2 (LNS2)		KEGG: 00561+3.1.3.4|KEGG: 00564+3.1.3.4|KEGG: 00565+3.1.3.4|KEGG: 00600+3.1.3.4|MetaCyc: PWY-6453|MetaCyc: PWY-7782|MetaCyc: PWY-8051|MetaCyc: PWY-8052|MetaCyc: PWY-8053|MetaCyc: PWY-8055|Reactome: R-HSA-1483191|Reactome: R-HSA-1483213|Reactome: R-HSA-4419969|Reactome: R-HSA-75109			LNS2/PITP	HAD-like superfamily		LIPIN family, LIPIN family
g1203	1	4187119	4191660		4		3	2	2			1207	0.25	Fibronectin type III domain	Fibronectin type III, Fibronectin type III superfamily, Immunoglobulin-like fold	GO:0005515		Fibronectin type III	Fibronectin type III	Fibronectin type III	Fibronectin type III superfamily
g1204	1	4192061	4196623									1165	1.12	Pyridine nucleotide-disulphide oxidoreductase, Vps53-like, N-terminal	FAD/NAD(P)-binding domain superfamily, Thioredoxin reductase, Pyridine nucleotide-disulphide oxidoreductase, class-II, active site, FAD/NAD(P)-binding domain, Vacuolar protein sorting-associated protein 53, Vps53-like, N-terminal	GO:0004791|GO:0005737|GO:0019430|GO:0055114|GO:0016491|GO:0055114|GO:0000938|GO:0042147	KEGG: 00450+1.8.1.9, Reactome: R-HSA-6811440				FAD/NAD(P)-binding domain superfamily	Thioredoxin reductase	Vacuolar protein sorting-associated protein 53
g1205	1	4196922	4198482									502	0.8	UTP--glucose-1-phosphate uridylyltransferase	UDP-sugar pyrophosphorylase, Nucleotide-diphospho-sugar transferases, UDPGP family	GO:0070569					Nucleotide-diphospho-sugar transferases		UDP-sugar pyrophosphorylase
g1206	1	4199940	4200899									319	0.94	Uracil DNA glycosylase superfamily	Uracil-DNA glycosylase-like domain superfamily, G/U mismatch-specific DNA glycosylase, Uracil-DNA glycosylase-like	GO:0006281|GO:0019104	Reactome: R-HSA-110328|Reactome: R-HSA-110329|Reactome: R-HSA-110357, Reactome: R-HSA-110328|Reactome: R-HSA-110329|Reactome: R-HSA-110357|Reactome: R-HSA-3108214|Reactome: R-HSA-5221030	G/U mismatch-specific DNA glycosylase		Uracil-DNA glycosylase-like	Uracil-DNA glycosylase-like domain superfamily		G/U mismatch-specific DNA glycosylase
g1207	1	4201107	4202595									472	0.85	Actin	Actin, conserved site, Actin family, ATPase, nucleotide binding domain					Actin family	ATPase, nucleotide binding domain, ATPase, nucleotide binding domain		Actin family, Actin family
g1208	1	4203766	4205079									437	1.37	tRNA synthetases class II (D, K and N), tRNA synthetases class II (D, K and N)	Aminoacyl-tRNA synthetase, class II (D/K/N), Aminoacyl-tRNA synthetase, class II, Lysyl-tRNA synthetase, class II, C-terminal	GO:0000166|GO:0004812|GO:0005524|GO:0006418|GO:0000166|GO:0004824|GO:0005524|GO:0005737|GO:0006430	KEGG: 00970+6.1.1.6|Reactome: R-HSA-2408522|Reactome: R-HSA-379716|Reactome: R-HSA-379726		Aminoacyl-tRNA synthetase, class II
g1209	1	4205387	4206926	1		1	1			Non-effector	0.703	462	2.16	Putative TOS1-like glycosyl hydrolase (DUF2401), Glycine-rich protein domain (DUF2403)	Cell wall protein YJL171C/Tos1, C-terminal, Cell wall protein YJL171C/Tos1, N-terminal
g1210	1	4208669	4210750									693	0.29	Helicase conserved C-terminal domain, DEAD/DEAH box helicase	Helicase, C-terminal, RNA helicase, DEAD-box type, Q motif, P-loop containing nucleoside triphosphate hydrolase, Helicase superfamily 1/2, ATP-binding domain, DEAD/DEAH box helicase domain	GO:0003676|GO:0005524			RNA helicase, DEAD-box type, Q motif, Helicase, C-terminal, Helicase superfamily 1/2, ATP-binding domain	Helicase, C-terminal, Helicase superfamily 1/2, ATP-binding domain	P-loop containing nucleoside triphosphate hydrolase, P-loop containing nucleoside triphosphate hydrolase
g1211	1	4211447	4212073									208	1.44
g1212	1	4212755	4213655									278	0.72
g1213	1	4215702	4216614									237	0.42
g1214	1	4217706	4219660									596	0.84
g1215	1	4221769	4223798									618	0.49
g1216	1	4227939	4234038		3		2	2	2			1752	1.2	Golgi CORVET complex core vacuolar protein 8, PIG-P	WD40/YVTN repeat-like-containing domain superfamily, Vacuolar protein sorting-associated protein 8, central domain, PIG-P, WD40-repeat-containing domain superfamily	GO:0005515	KEGG: 00563+2.4.1.198|Reactome: R-HSA-162710				WD40-repeat-containing domain superfamily
g1217	1	4234597	4235529									310		Protein of unknown function (DUF3752)	Protein of unknown function DUF3752
g1218	1	4236374	4237812		1		1	1	1			449	2	Ring finger domain	Zinc finger, RING-type, Zinc finger, RING/FYVE/PHD-type				Zinc finger, RING-type	Zinc finger, RING-type
g1219	1	4242245	4243214									182	2.2	Cyclophilin type peptidyl-prolyl cis-trans isomerase/CLD	Cyclophilin-type peptidyl-prolyl cis-trans isomerase domain, Cyclophilin-like domain superfamily, Cyclophilin-type peptidyl-prolyl cis-trans isomerase, Cyclophilin-type peptidyl-prolyl cis-trans isomerase, conserved site	GO:0000413|GO:0003755|GO:0003755|GO:0003755|GO:0006457			Cyclophilin-type peptidyl-prolyl cis-trans isomerase domain		Cyclophilin-like domain superfamily
g1220	1	4244135	4245694	1		1	1			Non-effector	0.94	519	0.39
g1221	1	4249581	4252250									855	1.75	TEA/ATTS domain	TEA/ATTS domain, TEA/ATTS domain superfamily	GO:0003700|GO:0006355	Reactome: R-HSA-2032785|Reactome: R-HSA-8951671		TEA/ATTS domain	TEA/ATTS domain
g1222	1	4253295	4256123									817		RNA recognition motif. (a.k.a. RRM, RBD, or RNP domain), RNA recognition motif. (a.k.a. RRM, RBD, or RNP domain), RNA recognition motif. (a.k.a. RRM, RBD, or RNP domain), RNA recognition motif. (a.k.a. RRM, RBD, or RNP domain), RNA recognition motif. (a.k.a. RRM, RBD, or RNP domain)	RNA recognition motif domain, RNA-binding domain superfamily, Nucleotide-binding alpha-beta plait domain superfamily, Mrd1, RNA recognition motif 3	GO:0003676		Mrd1, RNA recognition motif 3	RNA recognition motif domain, RNA recognition motif domain, RNA recognition motif domain, RNA recognition motif domain, RNA recognition motif domain	RNA recognition motif domain, RNA recognition motif domain, RNA recognition motif domain, RNA recognition motif domain, RNA recognition motif domain	RNA-binding domain superfamily, RNA-binding domain superfamily, RNA-binding domain superfamily
g1223	1	4260074	4260744									103	1.94	Dynein light chain type 1	Dynein light chain, type 1/2, Dynein light chain, type 1/2, conserved site, Dynein light chain superfamily	GO:0007017|GO:0030286|GO:0005875|GO:0007017	Reactome: R-HSA-141444|Reactome: R-HSA-1632852|Reactome: R-HSA-2132295|Reactome: R-HSA-2467813|Reactome: R-HSA-2500257|Reactome: R-HSA-3371497|Reactome: R-HSA-5620924|Reactome: R-HSA-5663220|Reactome: R-HSA-6807878|Reactome: R-HSA-6811436|Reactome: R-HSA-68877|Reactome: R-HSA-9609690|Reactome: R-HSA-9646399|Reactome: R-HSA-9648025			Dynein light chain, type 1/2	Dynein light chain superfamily		Dynein light chain, type 1/2
g1224	1	4269726	4271857									662	0.3		E3 ubiquitin-protein ligase UBR1-like	GO:0061630|GO:0071596	MetaCyc: PWY-7511						E3 ubiquitin-protein ligase UBR1-like, E3 ubiquitin-protein ligase UBR1-like
g1225	1	4272886	4273668									260	1.54
g1226	1	4274377	4275528									353	0.85	Lysine methyltransferase	Lysine methyltransferase, S-adenosyl-L-methionine-dependent methyltransferase						S-adenosyl-L-methionine-dependent methyltransferase
g1227	1	4276291	4277581									368	0.82
g1228	1	4278477	4280915									708	1.41
g1229	1	4287032	4287431									80	5	RNA polymerases N / 8 kDa subunit	RNA polymerase subunit RPB10, RNA polymerases, subunit N, zinc binding site, DNA-directed RNA polymerase, subunit N/Rpb10	GO:0003677|GO:0003899|GO:0006351|GO:0008270|GO:0003677|GO:0003899|GO:0006351	Reactome: R-HSA-112382|Reactome: R-HSA-113418|Reactome: R-HSA-167152|Reactome: R-HSA-167158|Reactome: R-HSA-167160|Reactome: R-HSA-167161|Reactome: R-HSA-167162|Reactome: R-HSA-167172|Reactome: R-HSA-167200|Reactome: R-HSA-167238|Reactome: R-HSA-167242|Reactome: R-HSA-167243|Reactome: R-HSA-167246|Reactome: R-HSA-167287|Reactome: R-HSA-167290|Reactome: R-HSA-168325|Reactome: R-HSA-1834949|Reactom…				RNA polymerase subunit RPB10		DNA-directed RNA polymerase, subunit N/Rpb10
g1230	1	4287763	4290751									962	0.42	WD domain, G-beta repeat, WD domain, G-beta repeat	WD40 repeat, WD40-repeat-containing domain, WD40/YVTN repeat-like-containing domain superfamily, Quinoprotein amine dehydrogenase, beta chain-like	GO:0005515			WD40-repeat-containing domain, WD40 repeat	WD40 repeat, WD40 repeat	Quinoprotein amine dehydrogenase, beta chain-like
g1231	1	4291245	4292465			1	1					389	0.51	2OG-Fe(II) oxygenase superfamily, non-haem dioxygenase in morphine synthesis N-terminal	Oxoglutarate/iron-dependent dioxygenase, Isopenicillin N synthase-like, Non-haem dioxygenase N-terminal domain	GO:0016491|GO:0055114			Oxoglutarate/iron-dependent dioxygenase
g1232	1	4292696	4293109									74	5.41	4F5 protein family, Zinc-binding	Uncharacterised protein family SERF, N-terminal, At2g23090-like, zinc-binding domain, ZNF706/At2g23090 superfamily, At2g23090-like		Reactome: R-HSA-212436						At2g23090-like
g1233	1	4294370	4295864									481	1.04	Berberine and berberine like, FAD binding domain	FAD-binding, type PCMH, subdomain 1, Berberine/berberine-like, FAD-binding domain, PCMH-type, FAD linked oxidase, N-terminal, FAD-binding, type PCMH, subdomain 2, FAD-binding, type PCMH-like superfamily	GO:0016491|GO:0050660|GO:0055114|GO:0071949|GO:0050660			FAD-binding domain, PCMH-type		FAD-binding, type PCMH-like superfamily
g1234	1	4296462	4297411									265	1.13
g1235	1	4298051	4299487									478	1.05	Protein of unknown function (DUF1479)	Protein of unknown function DUF1479, Isopenicillin N synthase-like								Protein of unknown function DUF1479
g1236	1	4299941	4300766		3		2	2	3			213	0.47	Bap31/Bap29 transmembrane region, Bap31/Bap29 cytoplasmic coiled-coil domain	BAP29/BAP31, transmembrane domain, Bap31/Bap29 cytoplasmic coiled-coil domain, B-cell receptor-associated protein 29/31	GO:0005783|GO:0006886|GO:0016021							B-cell receptor-associated protein 29/31
g1237	1	4301490	4304972									1143	2.45	CXC domain, MCSS domain, EZH2 N-terminal domain, SET domain	Pre-SET CXC domain, MCSS domain, SET domain, EZH2, N-terminal domain, CXC domain	GO:0005515			CXC domain, SET domain	SET domain
g1238	1	4307087	4308374									352	0.57	Eisosome component PIL1	AH/BAR domain superfamily, Eisosome component PIL1/LSP1								Eisosome component PIL1/LSP1
g1239	1	4308615	4308998									106	0.94	LSM domain	LSM domain containing 1, LSM domain superfamily, LSM domain, eukaryotic/archaea-type	GO:0031417	Reactome: R-HSA-6811440	LSM domain containing 1		LSM domain, eukaryotic/archaea-type	LSM domain superfamily		LSM domain containing 1
g1240	1	4309386	4313090									1234	0.41	XPG I-region, XPG N-terminal domain	XPG N-terminal, XPG-I domain, XPG conserved site, 5'-3' exonuclease, C-terminal domain superfamily, XPG/Rad2 endonuclease, Helix-hairpin-helix motif, class 2, PIN-like domain superfamily, XPG/Rad2 endonuclease, eukaryotes	GO:0004518|GO:0016788|GO:0003677|GO:0003824|GO:0003697|GO:0004519|GO:0005634|GO:0006289	Reactome: R-HSA-5696395|Reactome: R-HSA-5696400|Reactome: R-HSA-6782135			XPG N-terminal, XPG-I domain, Helix-hairpin-helix motif, class 2	5'-3' exonuclease, C-terminal domain superfamily, PIN-like domain superfamily
g1241	1	4313718	4317138									1046	0.48	Domain of unknown function (DUF1708)	Meiotically up-regulated protein Msb1/Mug8, Domain of unknown function DUF1708								Meiotically up-regulated protein Msb1/Mug8
g1242	1	4320575	4321737									368	0.54	Uracil DNA glycosylase superfamily	Uracil-DNA glycosylase, active site, Uracil-DNA glycosylase-like domain superfamily, Uracil-DNA glycosylase family 1, Uracil-DNA glycosylase-like	GO:0006281|GO:0016799|GO:0004844|GO:0006281|GO:0006284	Reactome: R-HSA-110328|Reactome: R-HSA-110329|Reactome: R-HSA-110357	Uracil-DNA glycosylase family 1		Uracil-DNA glycosylase-like	Uracil-DNA glycosylase-like domain superfamily	Uracil-DNA glycosylase family 1	Uracil-DNA glycosylase family 1
g1243	1	4323120	4325768	1	1	1	1	1	1			823	0.36	Sel1 repeat, Sel1 repeat, Sel1 repeat, Sel1 repeat, Sel1 repeat, Sel1 repeat, Sel1 repeat, Sel1 repeat, Sel1 repeat, Sel1 repeat	Tetratricopeptide-like helical domain superfamily, Sel1-like repeat	GO:0005515				Sel1-like repeat, Sel1-like repeat, Sel1-like repeat, Sel1-like repeat, Sel1-like repeat, Sel1-like repeat, Sel1-like repeat, Sel1-like repeat, Sel1-like repeat, Sel1-like repeat
g1244	1	4326967	4327576		1		1	1	1			166	0.6	Chitin synthesis regulation, resistance to Congo red	Chitin synthesis regulation, Congo red resistance, RCR protein
g1245	1	4327982	4328724									219
g1246	1	4329400	4332486									959	0.73	Threonyl and Alanyl tRNA synthetase second additional domain, DHHA1 domain, tRNA synthetases class II (A)	Threonyl/alanyl tRNA synthetase, SAD, Alanyl-tRNA synthetase, class IIc, core domain, Threonyl/alanyl tRNA synthetase, class II-like, putative editing domain superfamily, Alanine-tRNA ligase, class IIc, DHHA1 domain, Alanine-tRNA ligase, class IIc, anti-codon-binding domain superfamily, Alanyl-tRNA synthetase, class IIc, N-terminal, Alanine-tRNA ligase, eukaryota/bacteria, Translation protein, be…	GO:0004812|GO:0005524|GO:0043039|GO:0003676|GO:0004813|GO:0005524|GO:0006419|GO:0000166|GO:0000166|GO:0005737|GO:0003676|GO:0000166|GO:0004813|GO:0005524|GO:0005737|GO:0006419|GO:0000166|GO:0004813|GO:0005524|GO:0006419|GO:0004813	KEGG: 00970+6.1.1.7, KEGG: 00970+6.1.1.7|Reactome: R-HSA-379716		Alanyl-tRNA synthetase, class IIc, core domain	Threonyl/alanyl tRNA synthetase, SAD	Threonyl/alanyl tRNA synthetase, class II-like, putative editing domain superfamily, Alanine-tRNA ligase, class IIc, anti-codon-binding domain superfamily, Translation protein, beta-barrel domain superfamily	Alanine-tRNA ligase, class IIc
g1247	1	4332765	4334381									504	0.6	Putative S-adenosyl-L-methionine-dependent methyltransferase	Protein arginine methyltransferase NDUFAF7, S-adenosyl-L-methionine-dependent methyltransferase		Reactome: R-HSA-6799198				S-adenosyl-L-methionine-dependent methyltransferase		Protein arginine methyltransferase NDUFAF7
g1248	1	4335198	4336535		1		1	1	1			445	0.9	Pyridoxal-phosphate dependent enzyme	Tryptophan synthase beta subunit-like PLP-dependent enzyme, Pyridoxal-phosphate dependent enzyme, Cysteine synthase/cystathionine beta-synthase, pyridoxal-phosphate attachment site	GO:0006535	Reactome: R-HSA-1614603				Tryptophan synthase beta subunit-like PLP-dependent enzyme
g1249	1	4336974	4338156									307	2.28	Transcription factor S-II (TFIIS), Transcription factor S-II (TFIIS), central domain, TFIIS helical bundle-like domain	Transcription elongation factor S-II, central domain, Zinc finger, TFIIS-type, Transcription elongation factor S-II, central domain superfamily, TFIIS/LEDGF domain superfamily, Transcription factor IIS, N-terminal, Transcription elongation factor, TFIIS/CRSP70, N-terminal, sub-type, Transcription elongation factor, TFIIS, Transcription elongation factor, IIS-type	GO:0006351|GO:0003676|GO:0006351|GO:0008270|GO:0005634|GO:0003676|GO:0005634|GO:0006351|GO:0006355			Transcription elongation factor S-II, central domain, Transcription factor IIS, N-terminal, Zinc finger, TFIIS-type	Transcription elongation factor, TFIIS/CRSP70, N-terminal, sub-type, Zinc finger, TFIIS-type, Transcription elongation factor S-II, central domain	TFIIS/LEDGF domain superfamily, Transcription elongation factor S-II, central domain superfamily	Transcription elongation factor, TFIIS
g1250	1	4338670	4341160		3		2	2	3			814	0.49	Protein of unknown function (DUF726)	Protein of unknown function DUF726, Alpha/Beta hydrolase fold						Alpha/Beta hydrolase fold		Protein of unknown function DUF726
g1251	1	4342403	4343062									219
g1252	1	4343170	4344378									285	1.75	Thg1 C terminal domain, tRNAHis guanylyltransferase	Thg1 C-terminal domain, tRNAHis guanylyltransferase Thg1, tRNAHis guanylyltransferase catalytic domain, tRNAHis guanylyltransferase Thg1 superfamily	GO:0000287|GO:0006400|GO:0008193	Reactome: R-HSA-6782315						tRNAHis guanylyltransferase Thg1
g1253	1	4345414	4346561									350	1.14		WD40-repeat-containing domain superfamily, Retinoblastoma-binding protein 5/Swd1, WD40/YVTN repeat-like-containing domain superfamily	GO:0005515|GO:0048188	Reactome: R-HSA-201722|Reactome: R-HSA-3214841|Reactome: R-HSA-3769402|Reactome: R-HSA-5617472|Reactome: R-HSA-8936459|Reactome: R-HSA-8951664				WD40-repeat-containing domain superfamily		Retinoblastoma-binding protein 5/Swd1
g1254	1	4347641	4353002									1751	0.86	RNA polymerase Rpb1, domain 5, RNA polymerase Rpb1 C-terminal repeat, RNA polymerase Rpb1 C-terminal repeat, RNA polymerase Rpb1 C-terminal repeat, RNA polymerase Rpb1 C-terminal repeat, RNA polymerase Rpb1 C-terminal repeat, RNA polymerase Rpb1 C-terminal repeat, RNA polymerase Rpb1 C-terminal repeat, RNA polymerase Rpb1, domain 6, RNA polymerase Rpb1, domain 7, RNA polymerase Rpb1, domain 1, RN…	RNA polymerase Rpb1, domain 5, RNA polymerase Rpb1, domain 7 superfamily, RNA polymerase II, heptapeptide repeat, eukaryotic, RNA polymerase Rpb1, domain 6, RNA polymerase Rpb1, funnel domain superfamily, RNA polymerase Rpb1, domain 7, RNA polymerase Rpb1, domain 3 superfamily, RNA polymerase Rpb1, domain 1, RNA polymerase Rpb1, domain 3, RNA polymerase, N-terminal, RNA polymerase Rpb1, domain 4,…	GO:0003677|GO:0003899|GO:0006351|GO:0003677|GO:0006366	Reactome: R-HSA-112382|Reactome: R-HSA-113418|Reactome: R-HSA-167152|Reactome: R-HSA-167158|Reactome: R-HSA-167160|Reactome: R-HSA-167161|Reactome: R-HSA-167162|Reactome: R-HSA-167172|Reactome: R-HSA-167200|Reactome: R-HSA-167238|Reactome: R-HSA-167242|Reactome: R-HSA-167243|Reactome: R-HSA-167246|Reactome: R-HSA-167287|Reactome: R-HSA-167290|Reactome: R-HSA-168325|Reactome: R-HSA-203927|Reactome…			RNA polymerase, N-terminal
g1255	1	4354886	4355167									93
g1256	1	4359342	4360406									354	0.28
g1257	1	4372983	4373320									78	1.28
g1258	1	4374264	4375488			1	1					349		NAD(P)H-binding	NAD(P)-binding domain, NAD(P)-binding domain superfamily						NAD(P)-binding domain superfamily
g1259	1	4377018	4379526									614	0.98	Hsp70 protein	ATPase, nucleotide binding domain, Heat shock protein 70, conserved site, Heat shock protein 70 family, Heat shock protein 70kD, C-terminal domain superfamily, Heat shock protein 70kD, peptide-binding domain superfamily		Reactome: R-HSA-3371453				ATPase, nucleotide binding domain, Heat shock protein 70kD, C-terminal domain superfamily, ATPase, nucleotide binding domain, Heat shock protein 70kD, peptide-binding domain superfamily		Heat shock protein 70 family
g1260	1	4381321	4383932		2		2	1	2			820	0.85
g1261	1	4386227	4387796									490	0.82		F-box only protein 28								F-box only protein 28
g1262	1	4390963	4392441									492	0.81	SprT-like family	SprT-like
g1263	1	4393308	4395448		12		6	7	11			557	1.44	Major Facilitator Superfamily, Major Facilitator Superfamily	MFS transporter superfamily, Major facilitator superfamily domain, Major facilitator superfamily	GO:0022857|GO:0022857|GO:0055085			Major facilitator superfamily domain		MFS transporter superfamily
g1264	1	4396899	4399570		1		1	1	1			800	0.25	PA domain, Transferrin receptor-like dimerisation domain, Peptidase family M28	Glutamate carboxypeptidase 2-like, PA domain, Transferrin receptor-like, dimerisation domain, Vacuolar protein sorting-assoociated protein 70, Transferrin receptor-like, dimerisation domain superfamily, Peptidase M28						Transferrin receptor-like, dimerisation domain superfamily		Glutamate carboxypeptidase 2-like, Vacuolar protein sorting-assoociated protein 70
g1265	1	4400123	4401286						1			332	0.3	Oxidoreductase FAD-binding domain, Oxidoreductase NAD-binding domain	FAD-binding domain, ferredoxin reductase-type, Flavoprotein pyridine nucleotide cytochrome reductase-like, FAD-binding domain, Riboflavin synthase-like beta-barrel, Flavoprotein pyridine nucleotide cytochrome reductase, Ferredoxin-NADP reductase (FNR), nucleotide-binding domain, NADH:cytochrome b5 reductase-like, Oxidoreductase FAD/NAD(P)-binding	GO:0016491|GO:0055114	Reactome: R-HSA-1237044		FAD-binding domain, ferredoxin reductase-type		Riboflavin synthase-like beta-barrel, Ferredoxin-NADP reductase (FNR), nucleotide-binding domain
g1266	1	4402172	4403467									431	0.23	SH3 domain	SH3 domain, SH3-like domain superfamily	GO:0005515			SH3 domain	SH3 domain	SH3-like domain superfamily
g1267	1	4407114	4407936									255	1.57	Ssu72-like protein	RNA polymerase II subunit A	GO:0004721|GO:0005634|GO:0006397	KEGG: 04658+3.1.3.16|KEGG: 04660+3.1.3.16|KEGG: 05235+3.1.3.16|Reactome: R-HSA-6807505						RNA polymerase II subunit A
g1268	1	4409621	4411187									504	1.19	Alcohol acetyltransferase	Alcohol acetyltransferase/N-acetyltransferase
g1269	1	4413139	4416007									889	0.11	Spa2 homology domain (SHD) of GIT, Spa2 homology domain (SHD) of GIT	GIT, Spa2 homology (SHD) domain, Protein Spa2/Sph1					GIT, Spa2 homology (SHD) domain, GIT, Spa2 homology (SHD) domain			Protein Spa2/Sph1, Protein Spa2/Sph1
g1270	1	4416773	4418481		2	1	2	1	1			551	0.73	UDP-glucoronosyl and UDP-glucosyl transferase	UDP-glucuronosyl/UDP-glucosyltransferase	GO:0008194	Reactome: R-HSA-156588
g1271	1	4422550	4423998									482	1.24	JmjC domain, hydroxylase	JmjC domain				JmjC domain	JmjC domain
g1272	1	4424443	4425616		1	1	1	1	1			373	0.54	Protein of unknown function (DUF4448)	Pma1 stabilization in the Golgi protein 1
g1273	1	4427032	4427421									129	0.78
g1274	1	4428943	4429499									167	1.2	Cyclophilin type peptidyl-prolyl cis-trans isomerase/CLD	Cyclophilin-type peptidyl-prolyl cis-trans isomerase, conserved site, Cyclophilin-type peptidyl-prolyl cis-trans isomerase domain, Cyclophilin-type peptidyl-prolyl cis-trans isomerase, Cyclophilin-like domain superfamily	GO:0003755|GO:0006457|GO:0000413|GO:0003755|GO:0003755			Cyclophilin-type peptidyl-prolyl cis-trans isomerase domain		Cyclophilin-like domain superfamily
g1275	1	4432008	4433657									549	0.73	Cyclophilin type peptidyl-prolyl cis-trans isomerase/CLD	Cyclophilin-type peptidyl-prolyl cis-trans isomerase, conserved site, Cyclophilin-type peptidyl-prolyl cis-trans isomerase domain, Cyclophilin-like domain superfamily	GO:0003755|GO:0006457|GO:0000413|GO:0003755			Cyclophilin-type peptidyl-prolyl cis-trans isomerase domain		Cyclophilin-like domain superfamily
g1276	1	4435066	4437361									747		HSF-type DNA-binding	Heat shock transcription factor family, Heat shock factor (HSF)-type, DNA-binding, Winged helix DNA-binding domain superfamily, Winged helix-like DNA-binding domain superfamily	GO:0003700|GO:0006355|GO:0042025|GO:0043565				Heat shock factor (HSF)-type, DNA-binding	Winged helix DNA-binding domain superfamily		Heat shock transcription factor family
g1277	1	4440823	4442055									393	1.53	Cyclin, N-terminal domain, Cyclin, C-terminal domain	Cyclin, Cyclin, N-terminal, Cyclin-like, Cyclin-like superfamily, Cyclin, C-terminal domain	GO:0042025		Cyclin-like, Cyclin-like		Cyclin-like, Cyclin-like, Cyclin, C-terminal domain	Cyclin-like superfamily, Cyclin-like superfamily		Cyclin
g1278	1	4442366	4443616									74	4.05
g1279	1	4461588	4464026		1		1	1	1			812	0.37	Domain of unknown function (DUF3395), DnaJ domain	DnaJ domain, DnaJ-like protein C11, C-terminal, Chaperone J-domain superfamily		Reactome: R-HSA-8949613	DnaJ domain	DnaJ domain	DnaJ domain	Chaperone J-domain superfamily
g1280	1	4464631	4466495		6		3	4	5			577	1.91	Cation efflux family	Cation efflux transmembrane domain superfamily, Cation efflux protein, Cation efflux protein, cytoplasmic domain superfamily	GO:0006812|GO:0008324|GO:0016021|GO:0055085	Reactome: R-HSA-435368				Cation efflux transmembrane domain superfamily, Cation efflux protein, cytoplasmic domain superfamily	Cation efflux protein, Cation efflux protein
g1281	1	4471768	4472800									324	1.54	Memo-like protein	MEMO1 family		Reactome: R-HSA-6785631	MEMO1 family					MEMO1 family
g1282	1	4474916	4476386		1		1	1	1			376	0.8	Syntaxin, SNARE domain	SNARE, Target SNARE coiled-coil homology domain, Syntaxin, N-terminal domain	GO:0016020|GO:0016192|GO:0016020			Target SNARE coiled-coil homology domain	Target SNARE coiled-coil homology domain	SNARE
g1283	1	4477092	4477805									237
g1284	1	4478905	4480235									357	1.68	Glycosyl hydrolases family 18	2S globulin, Glycoside hydrolase superfamily, Chitinase II, Chitinase insertion domain superfamily, Glycoside hydrolase family 18, catalytic domain	GO:0008061|GO:0005975	KEGG: 00520+3.2.1.14|MetaCyc: PWY-6855|MetaCyc: PWY-6902|MetaCyc: PWY-7822			Chitinase II	Glycoside hydrolase superfamily, Chitinase insertion domain superfamily
g1285	1	4483198	4484483									359	2.79	Methyltransferase domain	S-adenosyl-L-methionine-dependent methyltransferase						S-adenosyl-L-methionine-dependent methyltransferase
g1286	1	4485034	4485792									252	5.95	CCCH-type zinc finger, Zinc finger C-x8-C-x5-C-x3-H type (and similar)	Zinc finger, CCCH-type, E3 ligase, CCCH-type zinc finger, Zinc finger, CCCH-type superfamily	GO:0046872			Zinc finger, CCCH-type, Zinc finger, CCCH-type, Zinc finger, CCCH-type, Zinc finger, CCCH-type, Zinc finger, CCCH-type	Zinc finger, CCCH-type, Zinc finger, CCCH-type, Zinc finger, CCCH-type, Zinc finger, CCCH-type, Zinc finger, CCCH-type	Zinc finger, CCCH-type superfamily, Zinc finger, CCCH-type superfamily
g1287	1	4486071	4487658		1		1	1				495	0.61	Fungal family of unknown function (DUF1776)	Protein of unknown function DUF1776, fungi, NAD(P)-binding domain superfamily						NAD(P)-binding domain superfamily
g1288	1	4489175	4490991									560	2.14	Amidase	Amidase signature (AS) superfamily, Amidase signature domain		KEGG: 00970+6.3.5.7				Amidase signature (AS) superfamily
g1289	1	4491166	4492374									402	0.75
g1290	1	4499891	4501577		2		2	1	2			378	2.65
g1291	1	4504040	4505629									493	1.62	Aldehyde dehydrogenase family	Aldehyde dehydrogenase domain, Aldehyde dehydrogenase, C-terminal, Aldehyde dehydrogenase, N-terminal, Aldehyde dehydrogenase, glutamic acid active site, Aldehyde dehydrogenase, cysteine active site, Aldehyde/histidinol dehydrogenase	GO:0016491|GO:0055114|GO:0016491|GO:0016620|GO:0055114					Aldehyde/histidinol dehydrogenase
g1292	1	4510285	4511504									247	0.81
g1293	1	4512110	4514624									821	0.37	Rgp1	Reduced growth phenotype protein 1, Arrestin, C-terminal		Reactome: R-HSA-6811438|Reactome: R-HSA-6811440|Reactome: R-HSA-8876198						Reduced growth phenotype protein 1
g1294	1	4516455	4519514									1019	1.86	WD domain, G-beta repeat	WD40 repeat, WD40-repeat-containing domain superfamily, WD40-repeat-containing domain, WD40/YVTN repeat-like-containing domain superfamily	GO:0005515			WD40-repeat-containing domain	WD40 repeat, WD40 repeat, WD40 repeat, WD40 repeat, WD40 repeat, WD40 repeat, WD40 repeat	WD40-repeat-containing domain superfamily, WD40-repeat-containing domain superfamily
g1295	1	4519758	4523421									1069	0.09		Bromodomain-like superfamily	GO:0005515					Bromodomain-like superfamily
g1296	1	4523731	4525290		1		1	1				501	2.2	Glycosyl transferases group 1, PIGA (GPI anchor biosynthesis)	Glycosyl transferase, family 1, PIGA, GPI anchor biosynthesis	GO:0006506	KEGG: 00563+2.4.1.198|Reactome: R-HSA-162710
g1297	1	4525925	4528630									901	0.55	DEAD/DEAH box helicase, Helicase conserved C-terminal domain	ATP-dependent RNA helicase DEAD-box, conserved site, Helicase, C-terminal, RNA helicase, DEAD-box type, Q motif, P-loop containing nucleoside triphosphate hydrolase, Helicase superfamily 1/2, ATP-binding domain, DEAD/DEAH box helicase domain	GO:0003676|GO:0005524			Helicase, C-terminal, RNA helicase, DEAD-box type, Q motif, Helicase superfamily 1/2, ATP-binding domain	Helicase superfamily 1/2, ATP-binding domain, Helicase, C-terminal	P-loop containing nucleoside triphosphate hydrolase
g1298	1	4529004	4532458		3		2	2	3			645	2.02		Zinc finger C2H2-type				Zinc finger C2H2-type
g1299	1	4534384	4535046		2		1	2	2			220	1.36	Protein of unknown function (DUF2470)	Domain of unknown function DUF2470, Haem oxygenase HugZ-like superfamily
g1300	1	4538842	4541292		1		1	1				816	1.84	Fungal specific transcription factor domain, Fungal Zn(2)-Cys(6) binuclear cluster domain	Zn(2)-C6 fungal-type DNA-binding domain, Transcription factor domain, fungi, Zn(2)-C6 fungal-type DNA-binding domain superfamily	GO:0000981|GO:0006355|GO:0008270|GO:0042025|GO:0003677|GO:0005634|GO:0006351|GO:0008270		Zn(2)-C6 fungal-type DNA-binding domain	Zn(2)-C6 fungal-type DNA-binding domain	Zn(2)-C6 fungal-type DNA-binding domain	Zn(2)-C6 fungal-type DNA-binding domain superfamily
g1301	1	4542267	4544641									649	1.54	Fungal specific transcription factor domain	Transcription factor domain, fungi	GO:0003677|GO:0005634|GO:0006351|GO:0008270				Transcription factor domain, fungi
g1302	1	4544716	4546305									252	3.17	RecQ zinc-binding, Helicase conserved C-terminal domain, DEAD/DEAH box helicase	ATP-dependent DNA helicase RecQ, zinc-binding domain, Helicase, C-terminal, DEAD/DEAH box helicase domain, P-loop containing nucleoside triphosphate hydrolase	GO:0003676|GO:0005524			Helicase, C-terminal	Helicase, C-terminal	P-loop containing nucleoside triphosphate hydrolase, P-loop containing nucleoside triphosphate hydrolase
g1303	1	4549111	4552107									982	0.71	Leucine rich repeat, RAM signalling pathway protein, RAM signalling pathway protein	Leucine-rich repeat, typical subtype, Leucine-rich repeat, RAM signalling pathway, SOG2, Leucine-rich repeat domain superfamily	GO:0005515			Leucine-rich repeat, Leucine-rich repeat, Leucine-rich repeat, Leucine-rich repeat	Leucine-rich repeat, typical subtype, Leucine-rich repeat, typical subtype
g1304	1	4552936	4553757									273	1.1	GCN5-like protein 1 (GCN5L1)	Biogenesis of lysosome-related organelles complex 1 subunit 1	GO:0031083	Reactome: R-HSA-432720|Reactome: R-HSA-432722						Biogenesis of lysosome-related organelles complex 1 subunit 1
g1305	1	4554022	4555065		6		3	4	6			308	0.97	3-oxo-5-alpha-steroid 4-dehydrogenase	3-oxo-5-alpha-steroid 4-dehydrogenase, C-terminal, 3-oxo-5-alpha-steroid 4-dehydrogenase/very-long-chain enoyl-CoA reductase	GO:0006629|GO:0016627			3-oxo-5-alpha-steroid 4-dehydrogenase, C-terminal				3-oxo-5-alpha-steroid 4-dehydrogenase/very-long-chain enoyl-CoA reductase
g1306	1	4557955	4560564									580	1.03	Ribosomal protein S8e	Ribosomal protein S8e, Ribosomal protein S8e/ribosomal biogenesis NSA2	GO:0003735|GO:0005840|GO:0006412	Reactome: R-HSA-156827|Reactome: R-HSA-156902|Reactome: R-HSA-1799339|Reactome: R-HSA-192823|Reactome: R-HSA-2408557|Reactome: R-HSA-6791226|Reactome: R-HSA-72649|Reactome: R-HSA-72689|Reactome: R-HSA-72695|Reactome: R-HSA-72702|Reactome: R-HSA-72706|Reactome: R-HSA-72764|Reactome: R-HSA-9010553|Reactome: R-HSA-9633012|Reactome: R-HSA-975956|Reactome: R-HSA-975957					Ribosomal protein S8e	Ribosomal protein S8e
g1307	1	4561146	4564333									974	0.51	Rab-GTPase-TBC domain	Rab-GTPase-TBC domain, Rab-GTPase-TBC domain superfamily				Rab-GTPase-TBC domain	Rab-GTPase-TBC domain	Rab-GTPase-TBC domain superfamily, Rab-GTPase-TBC domain superfamily
g1308	1	4568471	4580607									3992	0.65	Domain of Unknown Function (DUF908), HECT-domain (ubiquitin-transferase), Domain of Unknown Function (DUF913), Ubiquitin binding region, Ubiquitin binding region, Ubiquitin binding region	E3 ubiquitin ligase, domain of unknown function DUF908, HECT domain, E3 ubiquitin ligase, domain of unknown function DUF913, HECT, E3 ligase catalytic domain, HUWE1/Rev1, ubiquitin binding region	GO:0004842	MetaCyc: PWY-7511|Reactome: R-HSA-6798695|Reactome: R-HSA-983168, MetaCyc: PWY-7511|Reactome: R-HSA-983168	HECT domain	HECT domain	HECT domain	HECT, E3 ligase catalytic domain
g1309	1	4581257	4582465									239	0.84	Ribosomal protein S6e	Ribosomal protein S6, eukaryotic, Ribosomal protein S6e, Ribosomal protein S6e, conserved site	GO:0003735|GO:0005840|GO:0006412	Reactome: R-HSA-156827|Reactome: R-HSA-156902|Reactome: R-HSA-166208|Reactome: R-HSA-1799339|Reactome: R-HSA-192823|Reactome: R-HSA-2408557|Reactome: R-HSA-6790901|Reactome: R-HSA-6791226|Reactome: R-HSA-72649|Reactome: R-HSA-72689|Reactome: R-HSA-72695|Reactome: R-HSA-72702|Reactome: R-HSA-72706|Reactome: R-HSA-72764|Reactome: R-HSA-9010553|Reactome: R-HSA-9633012|Reactome: R-HSA-975956|Reactome…			Ribosomal protein S6e			Ribosomal protein S6e
g1310	1	4583590	4585028									453	1.77	Putative diphthamide synthesis protein	Diphthamide synthesis DHP1/DPH2, eukaryotes and archaea, Diphthamide synthesis DPH1/DPH2, Diphthamide synthesis DPH1/DPH2, domain 2, Diphthamide synthesis DPH1/DPH2, domain 3, Diphthamide synthesis DPH1/DPH2, domain 1	GO:0017183	MetaCyc: PWY-6482|MetaCyc: PWY-7546, MetaCyc: PWY-6482|MetaCyc: PWY-7546|Reactome: R-HSA-5358493					Diphthamide synthesis DPH1/DPH2	Diphthamide synthesis DPH1/DPH2
g1311	1	4585540	4587419									511	0.39	ATP synthase alpha/beta family, beta-barrel domain, ATP synthase alpha/beta family, nucleotide-binding domain	P-loop containing nucleoside triphosphate hydrolase, ATPase, F1/V1/A1 complex, alpha/beta subunit, N-terminal domain, V-type ATP synthase regulatory subunit B/beta, ATPase, V1 complex, subunit B, ATPase, alpha/beta subunit, nucleotide-binding domain, active site, ATPase, F1/V1/A1 complex, alpha/beta subunit, nucleotide-binding domain	GO:0046034|GO:1902600|GO:0033180|GO:1902600|GO:0005524	KEGG: 00190+7.1.2.2|KEGG: 00195+7.1.2.2|MetaCyc: PWY-7980, Reactome: R-HSA-1222556|Reactome: R-HSA-77387|Reactome: R-HSA-917977|Reactome: R-HSA-9639288|Reactome: R-HSA-983712				P-loop containing nucleoside triphosphate hydrolase	ATPase, V1 complex, subunit B	V-type ATP synthase regulatory subunit B/beta
g1312	1	4587818	4588981									369	1.63	HMGL-like	Pyruvate carboxyltransferase, Aldolase-type TIM barrel	GO:0003824			Pyruvate carboxyltransferase
g1313	1	4589527	4591230									449	3.12	Tubulin C-terminal domain, Tubulin/FtsZ family, GTPase domain	Tubulin/FtsZ, 2-layer sandwich domain, Tubulin, Tubulin/FtsZ, GTPase domain, Alpha tubulin, Tubulin, conserved site, Tubulin/FtsZ, C-terminal, Tubulin/FtsZ, C-terminal domain superfamily, Tubulin, C-terminal, Tubulin/FtsZ, GTPase domain superfamily	GO:0005874|GO:0007017|GO:0003924|GO:0005200|GO:0005525|GO:0005874|GO:0007017|GO:0005525|GO:0005874|GO:0007017	Reactome: R-HSA-1445148|Reactome: R-HSA-190840|Reactome: R-HSA-190861|Reactome: R-HSA-2132295|Reactome: R-HSA-2467813|Reactome: R-HSA-2500257|Reactome: R-HSA-3371497|Reactome: R-HSA-380320|Reactome: R-HSA-437239|Reactome: R-HSA-5617833|Reactome: R-HSA-5626467|Reactome: R-HSA-5663220|Reactome: R-HSA-6807878|Reactome: R-HSA-6811434|Reactome: R-HSA-6811436|Reactome: R-HSA-68877|Reactome: R-HSA-88522…			Tubulin/FtsZ, 2-layer sandwich domain, Tubulin/FtsZ, GTPase domain	Tubulin/FtsZ, C-terminal, Tubulin/FtsZ, GTPase domain superfamily		Tubulin
g1314	1	4592794	4593581		1	1	1	1	1			243	0.41	GPI-Mannosyltransferase II co-activator	GPI-Mannosyltransferase II co-activator, Pga1								GPI-Mannosyltransferase II co-activator, Pga1
g1315	1	4593927	4595593									519		WW domain	WW domain, WW domain superfamily	GO:0005515		WW domain	WW domain	WW domain	WW domain superfamily
g1316	1	4597053	4598402	1		1	1			Non-effector	0.951	431	2.55
g1317	1	4603723	4606642									916	0.11	LsmAD domain	LsmAD domain					LsmAD domain
g1318	1	4606712	4607192									83	1.2
g1319	1	4608972	4610519									454	0.22	Peptidase M16 inactive domain, Insulinase (Peptidase family M16)	Metalloenzyme, LuxS/M16 peptidase-like, Peptidase M16, C-terminal, Peptidase M16, N-terminal	GO:0003824|GO:0046872					Metalloenzyme, LuxS/M16 peptidase-like, Metalloenzyme, LuxS/M16 peptidase-like
g1320	1	4611069	4613155									633	0.95	RNA polymerase III subunit RPC82, RNA polymerase III subunit RPC82 helix-turn-helix domain	Winged helix-like DNA-binding domain superfamily, RNA polymerase III Rpc82, C -terminal, DNA-directed RNA polymerase III subunit RPC3, RNA polymerase III subunit RPC82-related, helix-turn-helix	GO:0003677|GO:0006351|GO:0003697|GO:0005666	Reactome: R-HSA-1834949|Reactome: R-HSA-73780|Reactome: R-HSA-73980|Reactome: R-HSA-749476|Reactome: R-HSA-76061|Reactome: R-HSA-76066|Reactome: R-HSA-76071						DNA-directed RNA polymerase III subunit RPC3
[truncated: 16,594 more rows]

## Sheet: Supplementary Table S2
Supplementary Table S2: Repeatmasker annotation summary of the Fusarium oxysporum Fo5176 genome
==================================================
number of length percentage
[truncated: 24 more rows]

## Sheet: Supplementary Table S3
Supplementary Table S3: Fusarium oxysporum genomes included in the comparative genomics analyses
[truncated: 106 more rows]
